# Supplementary material for: TBR1 regulates autism risk genes in the developing neocortex
Source: HighWire-hosted journal article supplement (doi:10.1101/gr.203612.115), 2016-06-20
Supplement: Supplemental_Material.pdf [file Supplemental_Material.pdf]

## Supplemental Figures

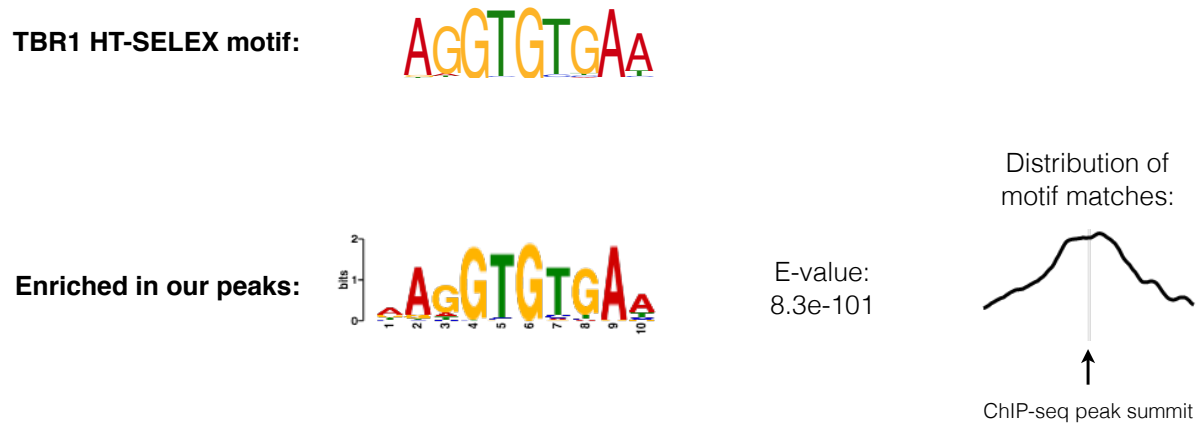

**Figure S1** MEME-ChIP (Machanick and Bailey 2011) motif discovery recovers the known TBR1 motif (Jolma et al. 2013) enriched at the summits of ChIP-seq peaks.

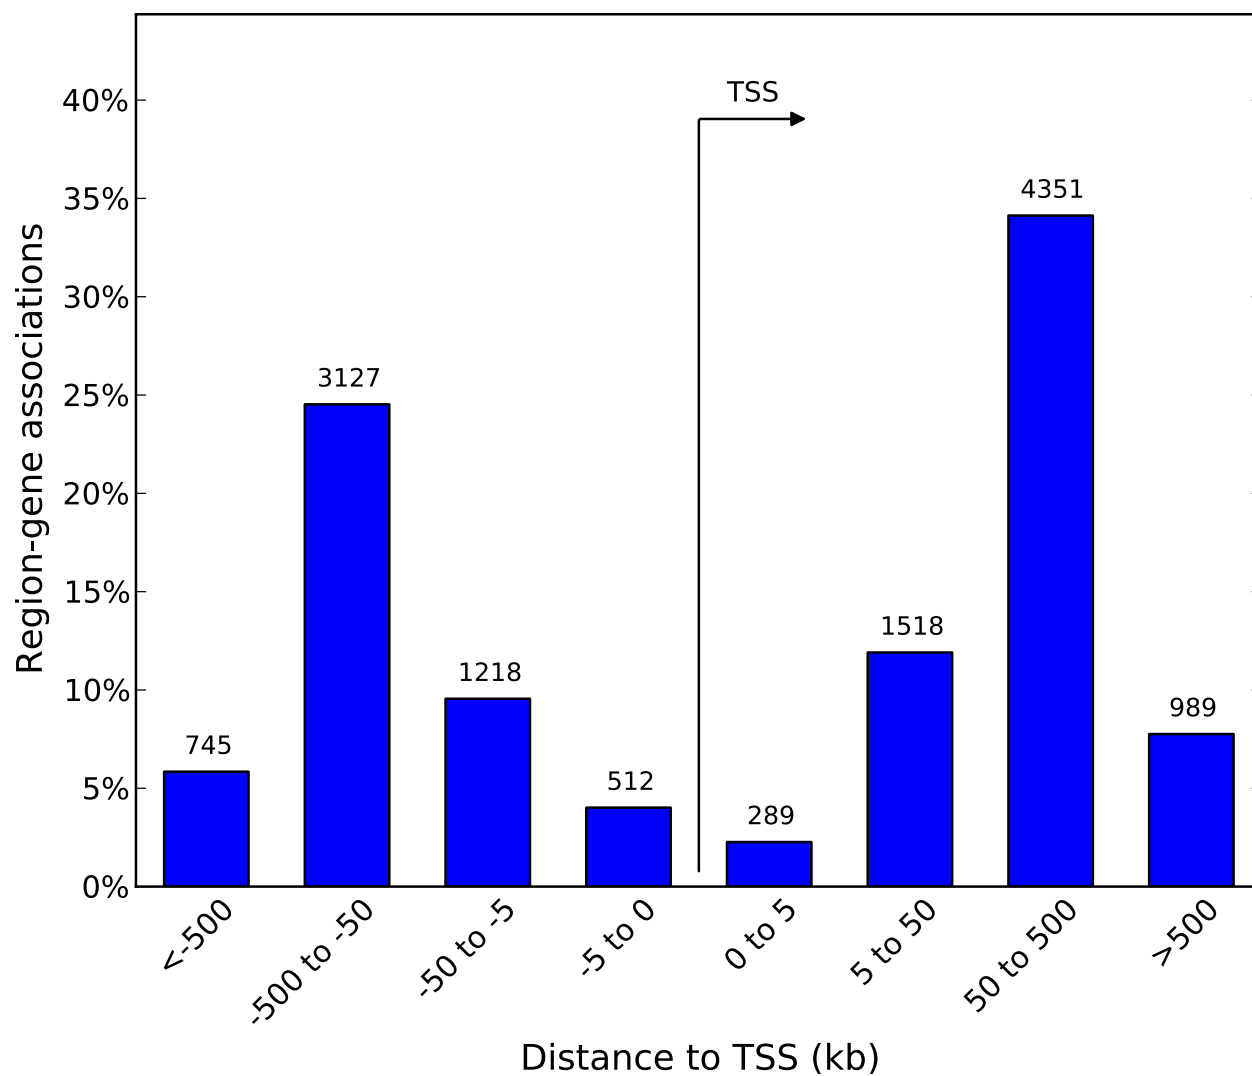

**Figure S2** Distribution of TBR1 ChIP-seq peak distances to the associated transcription start sites.

A

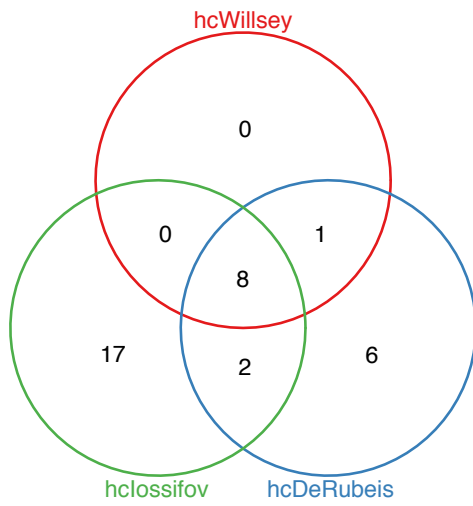

B

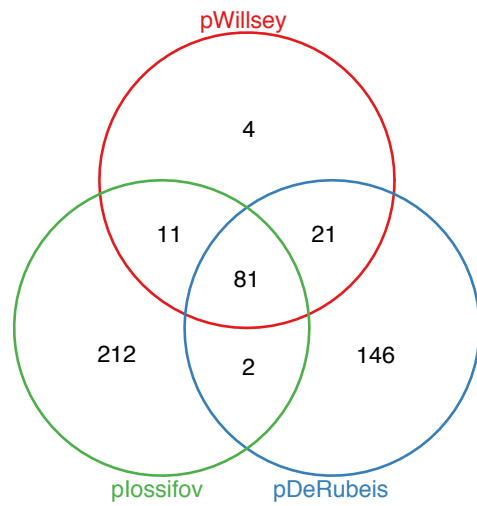

**Figure S3** Overlaps among the mouse orthologs of high-confidence (A) and probable (B) ASD genes from different studies. *SYNGAP1* was not mapped from the high-confidence human ASD gene set to mouse.

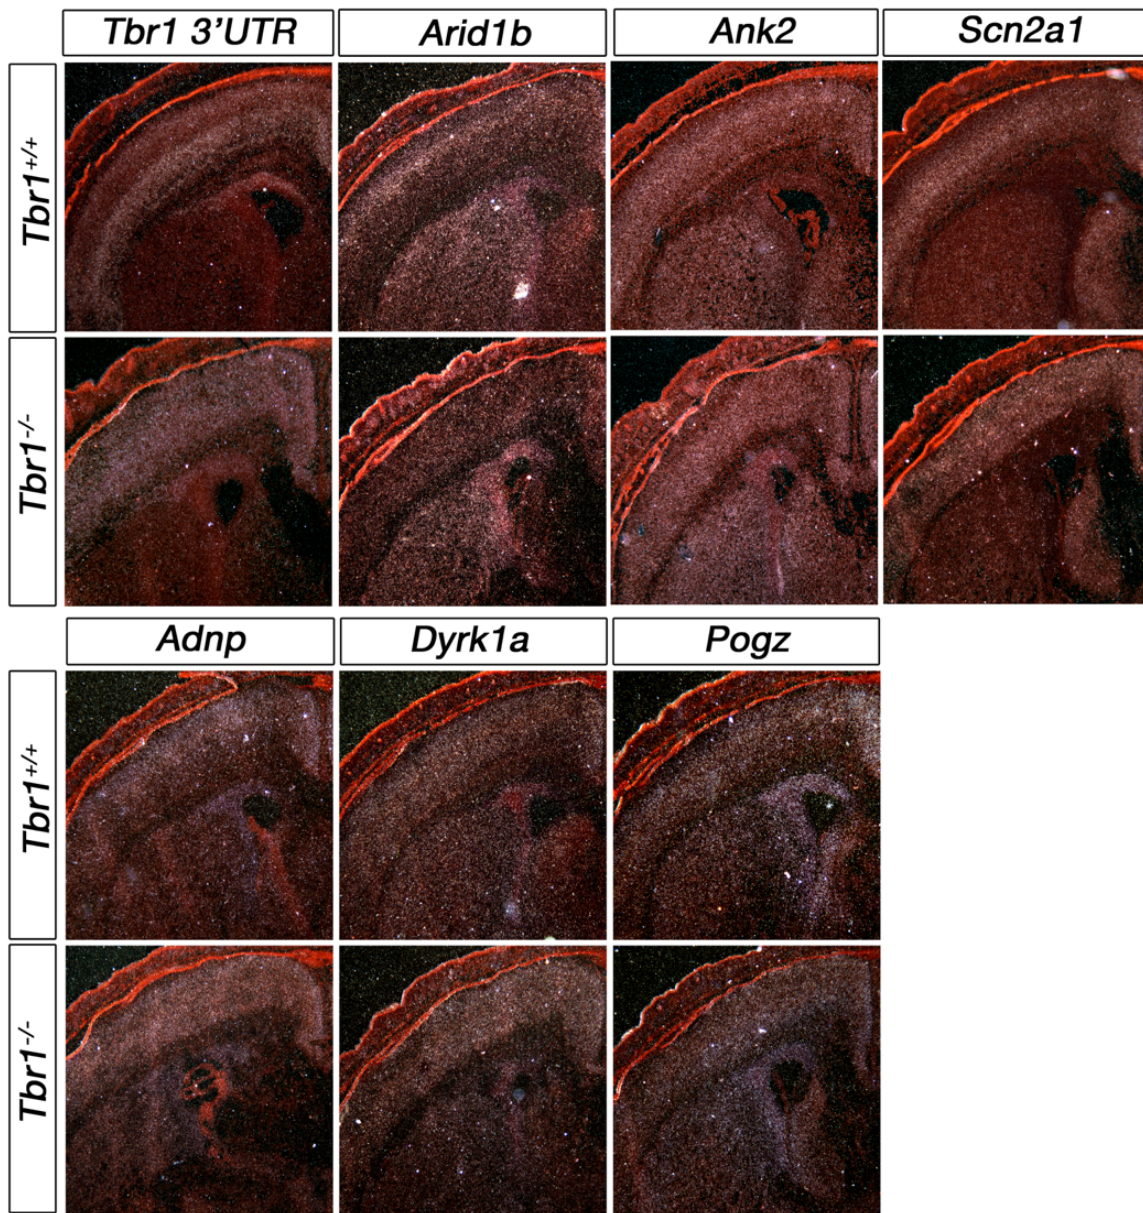

**Figure S4** Radioactive *in situ* hybridization (RISH) of high-confidence ASD genes at P0 in *Tbr1*<sup>+/+</sup> and *Tbr1*<sup>-/-</sup> cortices reveals expression differences.

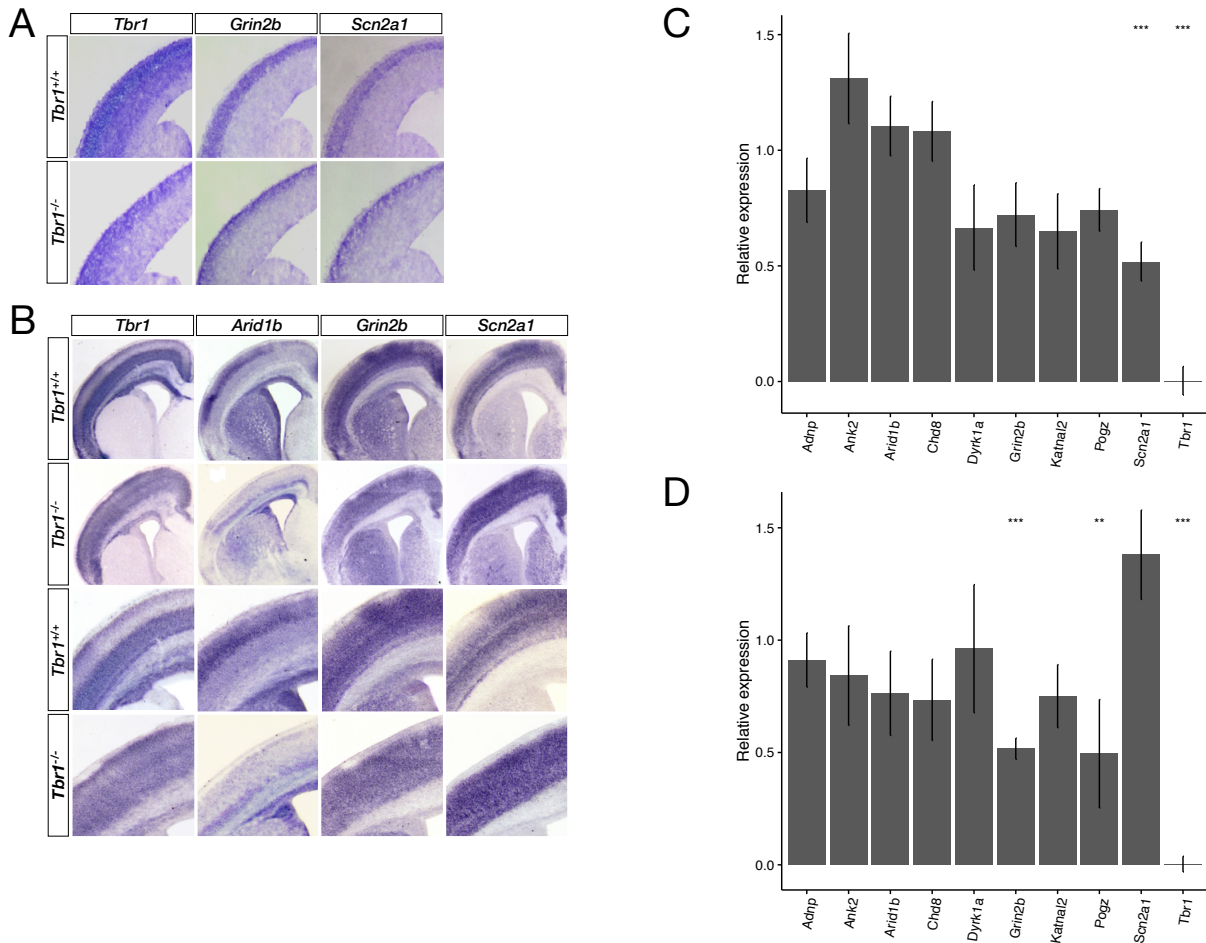

**Figure S5** Digoxigenin *in situ* hybridization of high-confidence genes at E14.5 (A) and P0 (B) in *Tbr1*<sup>+/+</sup> and *Tbr1*<sup>-/-</sup> cortices reveals expression differences. Relative expression corresponds to quantitative real-time PCR (qRT-PCR) results comparing transcript expression levels in the cortex of the *Tbr1* mutant mice and wild-type littermates at E14.5 (C) and P0 (D). The error bars represent the standard error of the mean. 2-sided *t*-test. \*\*p-value < 0.01; \*\*\*p-value < 0.001.

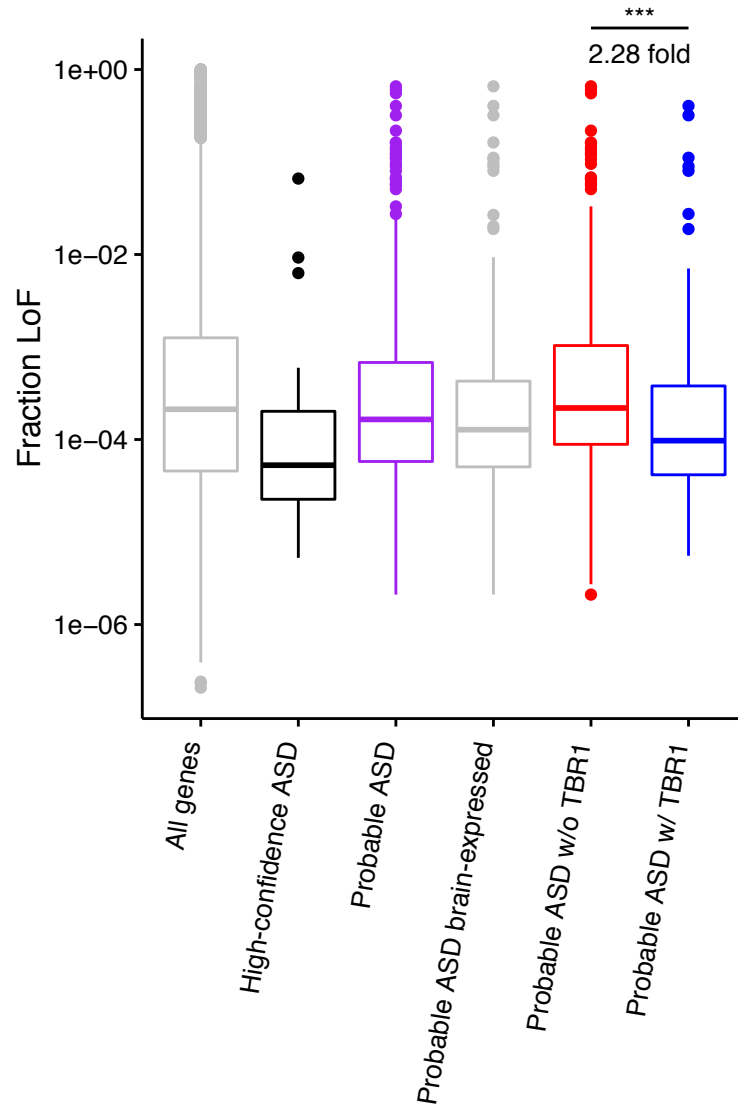

**Figure S6** Probable ASD genes that are TBR1 targets are depleted for RVIS percentiles. Box-plots depicting the distributions of RVIS percentiles for different ASD gene lists (x-axis). Probable ASD genes with adjacent TBR1 ChIP-seq peaks in the developing cortex (blue) have lower RVIS percentiles than those without an adjacent TBR1 peak (red). Significance was determined using the 1-sided 2-sample Wilcoxon test. \*\*\*p-value < 0.001.

## Supplemental Tables

**Table S1** GREAT enrichments corresponding to the E15.5 TBR1 ChIP-seq, E14.5 neocortex EP300 ChIP-seq, E15.5 neocortex SATB2 ChIP-seq, and 28 ENCODE ChIP-seq sets including tissues at different developmental time-points and primary cell lines featured in Figure 1.

**Table S2** Fraction LoF scores and RVIS percentiles for each gene. “NA” describes missing values.

**Table S3** The number of TBR1 ChIP-seq peaks adjacent to the mouse ortholog, GREAT binomial *p*-value, fraction LoF score, fraction LoF percentile among all genes, Icelandic knockout status, and limma *p*-value and fold for each high-confidence and probable ASD gene. “NA” describes missing values.

**Table S4** Gene ontology enrichment analysis of the mouse orthologs of probable ASD genes with at least one TBR1 ChIP-seq peak against the background of all probable ASD genes.

**Table S5** ChIP-seq replicate quality control information. NSC: normalized strand cross-correlation coefficient. RSC: relative strand cross-correlation coefficient.

**Table S6** PCR Primers used to generate probes for radioactive *in situ* hybridization. The T7 promoter sequence (5'- gcgcgtaatacgaactcactatagggc-3') was added to the 5' end of each reverse primer.

**Table S7** Primers used for qRT-PCR experiments.

**Table S8** cDNA clones used to synthesize DIG-labeled RNA probes for *in situ* hybridization on frozen sections.

## Supplemental References

- Jolma A, Yan J, Whittington T, Toivonen J, Nitta KR, Rastas P, Morgunova E, Enge M, Taipale M, Wei G, et al. 2013. DNA-binding specificities of human transcription factors. *Cell* **152**: 327–339.
- Machanick P, Bailey TL. 2011. MEME-ChIP: motif analysis of large DNA datasets. *Bioinformatics* **27**: 1696–1697.
