# Supplementary material for: TBR1 regulates autism risk genes in the developing neocortex
Source: HighWire-hosted journal article supplement (doi:10.1101/gr.203612.115), 2016-06-20
Supplement: Supplemental_Tables.xlsx [file Supplemental_Tables.xlsx]

## Sheet: Table S1
		hcWillsey				hcIossifov				hcDeRubeis				Merged
Context	Transcription factor	Binom Raw P-Value	Binom Observed Region Hits	Hyper FDR P-Val	Hyper Observed Gene Hits	Binom Raw P-Value	Binom Observed Region Hits	Hyper FDR P-Val	Hyper Observed Gene Hits	Binom Raw P-Value	Binom Observed Region Hits	Hyper FDR P-Val	Hyper Observed Gene Hits	Binom Raw P-Value	Binom Observed Region Hits	Hyper FDR P-Val	Hyper Observed Gene Hits
E15.5 Neocortex	TBR1	1.68856e-05	27	0.0159157	6	0.000203009	66	5.90225e-07	20	0.00135153	42	0.000255435	12	0.000110707	82	2.81247e-08	25
E14.5 Neocortex	EP300	0.00465095	19	0.121349	4	3.01438e-08	75	7.2243e-06	17	0.0105249	35	0.02175	8	6.88536e-06	81	2.39794e-05	19
Neocortex	EP300 - TBR1	0.0794801	12	0.265285	3	1.47272e-06	58	5.12135e-05	15	0.0956012	24	0.108335	6	0.000233935	61	0.000373503	16
E15.5 Neocortex	SATB2	0.306656	3	0.52707	1	0.139289	11	0.0595588	5	0.183961	7	0.149458	3	0.177059	13	0.0499981	6
Olfactory Bulb	CTCF	0.267683	24	0.0392342	8	0.137093	91	2.65611e-05	25	0.279471	54	0.000596407	16	0.346187	108	6.41165e-07	32
Cerebellum	CTCF	0.129437	41	0.0367129	9	0.00874144	160	4.92195e-05	27	0.293157	86	0.00194291	17	0.0783651	188	3.75101e-06	34
Lung	CTCF	0.276647	39	0.0437351	9	0.00580088	167	8.3237e-05	27	0.668567	80	0.0027044	17	0.0620794	196	7.27035e-06	34
ESC E14	ZNF384	0.878828	28	0.0237111	9	4.28989e-05	181	1.32484e-05	27	0.328486	86	0.000850573	17	9.59129e-05	222	7.18154e-07	34
Heart	EP300	0.710084	52	0.499304	7	0.0185691	248	0.0283087	24	0.994448	105	0.237418	14	0.752778	267	0.0175318	30
ESC E14	HCFC1	0.992866	6	0.465527	5	0.999758	30	0.0451949	18	0.999489	16	0.138558	11	0.999992	36	0.0195199	23
Small Intestine	CTCF	0.938956	17	0.0692102	8	0.195343	101	0.000167374	25	0.890721	48	0.00200001	16	0.606447	116	7.1323e-06	32
Bone marrow derived macrophage	CTCF	0.593526	36	0.138572	8	0.0323178	167	0.000225572	26	0.899039	77	0.00897916	16	0.508752	185	1.57742e-05	33
Megakaryocyte	TAL1	0.616866	16	0.208219	6	0.0446278	80	0.000309851	22	0.814361	35	0.0150034	13	0.128863	95	3.08804e-05	28
Limb	CTCF	0.441273	46	0.0735063	9	0.0180359	202	0.000395564	27	0.777156	99	0.0485065	16	0.160657	238	0.00064529	33
Liver	CTCF	0.415068	45	0.0854407	9	0.030497	193	0.000621373	27	0.940154	88	0.0095846	17	0.52669	215	9.14522e-05	34
Embryonic Fibroblast	CTCF	0.691546	54	0.0966423	9	2.15302e-06	295	0.000899401	27	0.784461	128	0.0120965	17	0.00306384	334	0.000145706	34
Spleen	CTCF	0.880026	28	0.205822	8	0.287629	140	0.000989011	26	0.872447	72	0.0843391	15	0.632166	167	0.000790215	32
Megakaryocyte	FLI1	0.775245	4	0.327675	3	0.916567	15	0.0614702	10	0.93506	8	0.328715	5	0.988702	16	0.120623	11
Erythroblast	TAL1	0.857164	7	0.325032	4	0.652846	36	0.0631727	13	0.955198	16	0.0630313	9	0.91444	40	0.0518278	16
Cortex	CTCF	0.0549689	65	0.104438	9	0.0263329	233	0.00113524	27	0.2075	135	0.0140061	17	0.0629705	288	0.000195372	34
Thymus	CTCF	0.998368	51	0.120296	9	0.018073	326	0.00173527	27	0.999498	136	0.018294	17	0.700595	362	0.000333403	34
Whole brain	CTCF	0.144933	68	0.126605	9	0.00396579	272	0.00202301	27	0.29849	148	0.0201488	17	0.0385474	327	0.000404477	34
Megakaryocyte	GATA1	0.361819	15	0.0813227	6	0.0428547	65	0.00260941	18	0.871187	26	0.159775	9	0.310383	71	0.00464183	21
ESC Bruce4	EP300	0.637203	31	0.198753	7	1.3535e-07	189	0.0026328	23	0.459504	79	0.0335295	14	8.9467e-05	213	0.000676271	29
Kidney	CTCF	0.139354	68	0.153446	9	0.0041254	271	0.00360294	27	0.408042	144	0.0289749	17	0.0947205	318	0.000836768	34
Testis	CTCF	0.908234	23	0.813338	5	0.182633	125	0.0039214	24	0.981953	54	0.589341	11	0.716199	141	0.0170691	28
ESC E14	MAFK	0.705926	19	0.302048	6	0.068759	96	0.00596636	21	0.894796	42	0.102081	12	0.405258	108	0.00338429	26
ESC Bruce4	CTCF	0.055495	60	0.343041	8	0.000311207	236	0.00711277	26	0.43149	117	0.067776	16	0.0234424	272	0.00136399	33
Heart	CTCF	0.270289	52	0.349297	8	0.00524279	220	0.00764086	26	0.294905	119	0.0706406	16	0.0589721	261	0.00149695	33
Bone Marrow	CTCF	0.844354	18	0.718561	5	0.00340934	113	0.0128484	22	0.679921	50	0.424173	11	0.022581	133	0.0111065	27
Erythroblast	GATA1	0.964912	6	0.359142	4	0.703587	40	0.0160094	15	0.979809	17	0.0295221	10	0.856951	48	0.000747586	21
ESC E14	ZC3H11A	0.255311	21	0.537385	5	0.13182	79	0.159235	17	0.548679	42	0.360883	10	0.152811	99	0.0849782	22

## Sheet: Table S2
Gene symbol	Ensembl Identifier	Fraction LoF	Fraction LoF percentile	RVIS percentile (%)
TSPAN6	ENSG00000000003	0.000460335	0.721122	52.2189
TNMD	ENSG00000000005	0.000561641	0.745502	40.9763
DPM1	ENSG00000000419	0.00167732	0.844521	57.0146
SCYL3	ENSG00000000457	0.000261622	0.646895	39.1723
C1orf112	ENSG00000000460	0.000161697	0.575673	16.8062
FGR	ENSG00000000938	0.000275092	0.65392	13.8124
CFH	ENSG00000000971	3.02758e-05	0.368844	18.2278
FUCA2	ENSG00000001036	0.000378303	0.697156	68.285
GCLC	ENSG00000001084	4.25961e-05	0.400285	22.5107
NFYA	ENSG00000001167	0.000311532	0.6718	26.2454
STPG1	ENSG00000001460	0.00033131	0.679501	NA
NIPAL3	ENSG00000001461	6.07208e-05	0.439315	36.7628
LAS1L	ENSG00000001497	0.00248188	0.870816	11.3905
ENPP4	ENSG00000001561	0.000145963	0.560047	51.3523
SEMA3F	ENSG00000001617	7.43551e-06	0.305511	17.0351
CFTR	ENSG00000001626	0.00126143	0.823072	99.3494
ANKIB1	ENSG00000001629	2.30811e-05	0.349987	76.8207
CYP51A1	ENSG00000001630	0.000181955	0.593854	22.5107
KRIT1	ENSG00000001631	0.000763758	0.778108	8.40913
RAD52	ENSG00000002016	0.0712017	0.973217	74.2787
MYH16	ENSG00000002079	0	0	NA
BAD	ENSG00000002330	0.00290633	0.880921	77.1761
LAP3	ENSG00000002549	0.00045077	0.71853	41.5517
CD99	ENSG00000002586	2.3223e-05	0.350438	72.0414
HS3ST1	ENSG00000002587	0.000119077	0.529882	22.5709
AOC1	ENSG00000002726	8.97527e-05	0.490177	NA
WNT16	ENSG00000002745	0.000124629	0.536456	29.5344
HECW1	ENSG00000002746	1.1438e-05	0.315615	1.11439
MAD1L1	ENSG00000002822	0.000370118	0.694114	NA
LASP1	ENSG00000002834	0.00105189	0.807145	37.5098
SNX11	ENSG00000002919	0.000128272	0.540739	17.5411
TMEM176A	ENSG00000002933	5.60368e-05	0.429511	80.5614
M6PR	ENSG00000003056	5.98189e-05	0.437549	NA
KLHL13	ENSG00000003096	0.000910095	0.794824	7.10059
CYP26B1	ENSG00000003137	0.000398009	0.703354	90.7054
ICA1	ENSG00000003147	0.0645936	0.971151	29.0103
DBNDD1	ENSG00000003249	0.000715486	0.771196	52.2137
ALS2	ENSG00000003393	6.50569e-05	0.447879	1.35534
CASP10	ENSG00000003400	0.000388248	0.700349	19.0531
CFLAR	ENSG00000003402	0.113552	0.980016	44.3287
TFPI	ENSG00000003436	0.000168623	0.581871	54.8521
NDUFAF7	ENSG00000003509	0.00108426	0.809887	NA
RBM5	ENSG00000003756	4.00963e-05	0.393561	4.9756
MTMR7	ENSG00000003987	4.04578e-05	0.394576	NA
SLC7A2	ENSG00000003989	0.000100766	0.505916	7.90314
ARF5	ENSG00000004059	0.000463129	0.721836	39.0097
SARM1	ENSG00000004139	0.447336	0.995117	NA
POLDIP2	ENSG00000004142	0.198602	0.987191	NA
PLXND1	ENSG00000004399	0.0139616	0.942865	81.1939
AK2	ENSG00000004455	0.000123832	0.535555	86.8924
CD38	ENSG00000004468	0.00211665	0.860749	86.8803
FKBP4	ENSG00000004478	0.000142491	0.556365	37.7327
KDM1A	ENSG00000004487	6.95747e-05	0.456482	6.43335
RBM6	ENSG00000004534	8.11675e-06	0.307389	15.6557
CAMKK1	ENSG00000004660	5.49311e-05	0.427182	15.0292
RECQL	ENSG00000004700	0.000479996	0.726419	62.424
CCDC132	ENSG00000004766	5.66346e-05	0.430675	11.6619
HSPB6	ENSG00000004776	0	0	NA
ARHGAP33	ENSG00000004777	0.00011106	0.519928	6.46347
NDUFAB1	ENSG00000004779	2.09031e-05	0.344089	42.1119
PDK4	ENSG00000004799	0.000288856	0.660944	24.9021
SLC22A16	ENSG00000004809	0.000123062	0.53454	81.7601
ZMYND10	ENSG00000004838	0.00208985	0.860148	89.5428
ABCB5	ENSG00000004846	0.0161554	0.94617	99.4217
ARX	ENSG00000004848	0	0	NA
SLC25A13	ENSG00000004864	0.000532273	0.738853	8.01157
ST7	ENSG00000004866	5.17898e-05	0.419781	37.7809
CDC27	ENSG00000004897	0.00874267	0.929304	99.3073
SLC4A1	ENSG00000004939	5.03894e-05	0.416739	58.0929
CALCR	ENSG00000004948	0.000719844	0.771909	29.7813
HCCS	ENSG00000004961	0	0	74.8521
DVL2	ENSG00000004975	7.73152e-05	0.470719	15.9569
PRSS22	ENSG00000005001	3.23827e-05	0.373953	49.0211
UPF1	ENSG00000005007	3.49934e-05	0.38109	1.17463
SKAP2	ENSG00000005020	4.15457e-05	0.397318	57.5688
SLC25A5	ENSG00000005022	0	0	72.6331
CCDC109B	ENSG00000005059	0.00107971	0.809436	86.549
HOXA11	ENSG00000005073	0.00490267	0.90808	55.5208
POLR2J	ENSG00000005075	6.8446e-05	0.454528	NA
DHX33	ENSG00000005100	0.000267022	0.649976	69.0862
MEOX1	ENSG00000005102	0.000565128	0.746178	NA
THSD7A	ENSG00000005108	3.17332e-05	0.372413	2.68659
LIG3	ENSG00000005156	0.00020996	0.615754	9.58978
RPAP3	ENSG00000005175	0.00021239	0.617595	18.1254
ACSM3	ENSG00000005187	0.00421981	0.901431	77.0616
AC004381.6	ENSG00000005189	0.00072245	0.77236	NA
CIAPIN1	ENSG00000005194	0.113219	0.979978	76.5496
SPPL2B	ENSG00000005206	0	0	NA
FAM214B	ENSG00000005238	0.000829381	0.785883	82.7601
COPZ2	ENSG00000005243	0.592082	0.996995	NA
PRKAR2B	ENSG00000005249	0	0	35.1967
MSL3	ENSG00000005302	9.63012e-06	0.311371	NA
CREBBP	ENSG00000005339	0.000221378	0.623117	0.361424
BZRAP1	ENSG00000005379	6.9471e-05	0.456369	98.2471
MPO	ENSG00000005381	0.00959923	0.933135	NA
PON1	ENSG00000005421	0.000641213	0.759663	89.85
GCFC2	ENSG00000005436	0.00047524	0.725254	91.9161
WDR54	ENSG00000005448	0.00440206	0.903159	61.2794
CROT	ENSG00000005469	0.000612772	0.75448	84.778
ABCB4	ENSG00000005471	6.29348e-05	0.443484	9.08981
KMT2E	ENSG00000005483	0.00928261	0.931483	NA
RHBDD2	ENSG00000005486	5.38197e-06	0.300477	19.8181
SOX8	ENSG00000005513	7.86651e-06	0.306525	77.3146
IBTK	ENSG00000005700	5.7963e-05	0.43383	10.6138
ZNF195	ENSG00000005801	0.0011272	0.812855	21.2879
MYCBP2	ENSG00000005810	6.04391e-05	0.438601	NA
FBXL3	ENSG00000005812	0.00343668	0.891063	16.6737
ITGAL	ENSG00000005844	8.36474e-05	0.480936	4.06602
PDK2	ENSG00000005882	5.25182e-05	0.421923	18.7459
ITGA3	ENSG00000005884	0.000165158	0.578791	22.6251
ZFX	ENSG00000005889	2.06067e-05	0.343225	15.3846
LAMP2	ENSG00000005893	0	0	36.5385
NA	ENSG00000005955	0.000142902	0.556816	NA
ITGA2B	ENSG00000005961	0.000223724	0.624432	23.7697
ASB4	ENSG00000005981	0.000248909	0.640059	38.9615
GDE1	ENSG00000006007	0.00118251	0.817512	54.2016
C19orf60	ENSG00000006015	3.37911e-05	0.378273	NA
CRLF1	ENSG00000006016	2.94513e-05	0.367003	26.7936
OSBPL7	ENSG00000006025	3.54163e-05	0.381954	6.92127
TMEM98	ENSG00000006042	0.000129943	0.542579	31.8776
YBX2	ENSG00000006047	4.08423e-06	0.29781	52.6655
KRT33A	ENSG00000006059	0.00102874	0.805191	90.109
MAP3K14	ENSG00000006062	0	0	NA
ABCC8	ENSG00000006071	8.95895e-05	0.489801	2.16252
NA	ENSG00000006074	0.000677803	0.765448	NA
NA	ENSG00000006075	0.000215657	0.619548	NA
NA	ENSG00000006114	0.000409641	0.706735	NA
CACNG3	ENSG00000006116	0	0	17.8604
TMEM132A	ENSG00000006118	0.000113456	0.523384	12.8908
AP2B1	ENSG00000006125	3.55775e-05	0.382367	5.37919
TAC1	ENSG00000006128	0	0	48.8284
ZNF263	ENSG00000006194	0.00053882	0.740318	49.5753
CX3CL1	ENSG00000006210	0.00157526	0.839675	75.9834
SPATA20	ENSG00000006282	0.000192008	0.602006	73.4835
CACNA1G	ENSG00000006283	0.000148636	0.563014	0.584302
TNFRSF12A	ENSG00000006327	0.476997	0.995605	65.8936
DLX6	ENSG00000006377	0.000235558	0.631945	59.2796
MAP3K9	ENSG00000006432	3.7169e-05	0.386575	NA
RALA	ENSG00000006451	0	0	51.8403
BAIAP2L1	ENSG00000006453	4.63801e-05	0.408399	38.4314
KDM7A	ENSG00000006459	2.56722e-05	0.356899	NA
ETV1	ENSG00000006468	7.93046e-06	0.306675	7.72845
AGK	ENSG00000006530	0.00658357	0.919988	79.9108
ALDH3B1	ENSG00000006534	0.14058	0.982871	NA
TTC22	ENSG00000006555	0.0391425	0.963187	NA
PHTF2	ENSG00000006576	7.02176e-05	0.457421	22.8239
CCL26	ENSG00000006606	0.0156064	0.945644	65.5262
FARP2	ENSG00000006607	0.00101006	0.803952	95.7653
USH1C	ENSG00000006611	0.000181376	0.593291	72.6101
GGCT	ENSG00000006625	0.000564454	0.746065	62.1167
DBF4	ENSG00000006634	0.000218016	0.621126	59.635
TBXA2R	ENSG00000006638	4.90344e-05	0.413884	68.3393
IFRD1	ENSG00000006652	3.46443e-05	0.380264	26.8478
LGALS14	ENSG00000006659	0.000147402	0.561699	83.6938
COX10	ENSG00000006695	1.19076e-05	0.316968	52.3583
GTF2IRD1	ENSG00000006704	9.29745e-05	0.495511	3.27691
PAF1	ENSG00000006712	0.000856498	0.788851	26.7092
VPS41	ENSG00000006715	0.000174212	0.586868	13.2643
ARHGAP44	ENSG00000006740	0.000199218	0.608091	10.3729
ELAC2	ENSG00000006744	0.000470428	0.723789	8.07783
SCIN	ENSG00000006747	0.109798	0.979377	94.0245
ARSD	ENSG00000006756	0.000243285	0.636715	86.0947
PNPLA4	ENSG00000006757	0.00148142	0.835318	64.0533
MYH13	ENSG00000006788	0.000375827	0.696255	NA
ADIPOR2	ENSG00000006831	9.4377e-06	0.310807	30.0404
CDKL3	ENSG00000006837	0.000394586	0.702491	78.5133
UPP2	ENSG00000007001	0.0899581	0.97656	63.3456
PRSS21	ENSG00000007038	0.0031218	0.885241	63.3456
MARK4	ENSG00000007047	4.33183e-06	0.298261	NA
PROM1	ENSG00000007062	0.000243697	0.636903	76.0436
CCDC124	ENSG00000007080	0.000138091	0.551482	68.5682
CEACAM21	ENSG00000007129	0.310485	0.992036	69.7006
PAFAH1B1	ENSG00000007168	0.000522066	0.736336	24.0467
NOS2	ENSG00000007171	8.64004e-05	0.484693	23.866
DNAH9	ENSG00000007174	0.000150738	0.564892	85.5129
KIAA0100	ENSG00000007202	0.000414299	0.7079	2.39745
SLC13A2	ENSG00000007216	0.00025745	0.644566	17.9688
GAS7	ENSG00000007237	3.49993e-05	0.381165	7.02367
TRAPPC6A	ENSG00000007255	0.0041169	0.900229	85.7298
MATK	ENSG00000007264	0.00370188	0.894857	NA
CEACAM7	ENSG00000007306	0.00254766	0.872657	78.2724
CD79B	ENSG00000007312	0	0	42.5095
SCN4A	ENSG00000007314	5.37383e-05	0.424439	14.5955
ST7L	ENSG00000007341	0.000375434	0.695992	90.8439
TKTL1	ENSG00000007350	0.00284171	0.879306	2.81065
PAX6	ENSG00000007372	0.000274153	0.653319	15.1858
RPUSD1	ENSG00000007376	0.000777875	0.780211	75.6581
RHBDF1	ENSG00000007384	7.31027e-05	0.462717	27.6791
LUC7L	ENSG00000007392	0.000311148	0.671538	47.3646
CACNA2D2	ENSG00000007402	0.000349044	0.686751	1.68665
BAIAP3	ENSG00000007516	0.000101374	0.506818	59.7434
TSR3	ENSG00000007520	0.00237395	0.867774	45.6358
PIGQ	ENSG00000007541	0.000132286	0.544871	94.6329
CRAMP1L	ENSG00000007545	0.000231576	0.629728	9.18017
TEAD3	ENSG00000007866	2.74475e-05	0.361557	61.8818
SELE	ENSG00000007908	0.000111481	0.520379	47.4128
DNAJC11	ENSG00000007923	0.0155913	0.945607	17.8965
FMO3	ENSG00000007933	0.000465152	0.722287	94.1991
MYLIP	ENSG00000007944	7.9605e-05	0.474513	NA
NOX1	ENSG00000007952	0.000560328	0.745164	91.8639
E2F2	ENSG00000007968	7.86912e-05	0.472822	31.5644
PSMB1	ENSG00000008018	4.94651e-06	0.299463	30.4861
SYN1	ENSG00000008056	1.54338e-05	0.327148	NA
JARID2	ENSG00000008083	1.40026e-05	0.323279	2.81911
CDKL5	ENSG00000008086	0.000509327	0.733669	1.18343
CAMK1G	ENSG00000008118	5.00914e-05	0.41595	61.6409
CDK11A	ENSG00000008128	0.000340544	0.683295	88.5067
NADK	ENSG00000008130	0.000358822	0.69032	25.3961
TFAP2B	ENSG00000008196	1.98011e-05	0.340746	18.7459
TFAP2D	ENSG00000008197	1.08935e-05	0.314451	15.5292
DLEC1	ENSG00000008226	0.00261034	0.87431	88.6212
CYTH3	ENSG00000008256	6.05555e-05	0.438939	19.5711
ADAM22	ENSG00000008277	0.000389831	0.700838	43.2323
SYPL1	ENSG00000008282	5.66066e-05	0.4306	68.9055
CYB561	ENSG00000008283	0.00122061	0.820142	66.6345
SPAG9	ENSG00000008294	0.00185115	0.851471	24.625
CELSR3	ENSG00000008300	0.000236171	0.632809	9.58376
AASS	ENSG00000008311	0.00118919	0.818339	12.2342
PLEKHG6	ENSG00000008323	0.00131782	0.826791	77.2363
SS18L2	ENSG00000008324	0.00776563	0.925623	43.1721
MPND	ENSG00000008382	0.000146061	0.560197	NA
MGST1	ENSG00000008394	0.000606268	0.75354	NA
CRY1	ENSG00000008405	0.000279689	0.655911	7.20439
PGLYRP1	ENSG00000008438	0.000181708	0.593479	68.9055
NFIX	ENSG00000008441	0.000213796	0.618234	14.4389
ST3GAL1	ENSG00000008513	3.75319e-05	0.387514	51.9186
MMP25	ENSG00000008516	0.000273182	0.652981	NA
IL32	ENSG00000008517	0.000402602	0.704557	88.4646
PKD1	ENSG00000008710	0.000252296	0.642087	99.8735
MAPK8IP2	ENSG00000008735	0.178479	0.986139	NA
MED24	ENSG00000008838	0.000121874	0.533	NA
RHOBTB2	ENSG00000008853	4.35646e-05	0.402276	29.1669
HEATR5B	ENSG00000008869	0.000146618	0.560723	0.674658
SEC62	ENSG00000008952	0.00199	0.856204	42.889
RPS20	ENSG00000008988	6.93265e-05	0.456181	54.6112
CSDE1	ENSG00000009307	3.7068e-05	0.386161	6.73453
UBE3C	ENSG00000009335	0.000106886	0.514481	3.59617
REV3L	ENSG00000009413	3.13169e-05	0.371173	0.843323
TENM1	ENSG00000009694	3.0931e-05	0.370234	NA
PAX7	ENSG00000009709	3.35994e-05	0.377672	16.6918
MASP2	ENSG00000009724	0.000554335	0.743774	NA
IYD	ENSG00000009765	5.11458e-05	0.418617	83.8022
FAM76A	ENSG00000009780	9.60557e-05	0.499718	53.7678
TRAF3IP3	ENSG00000009790	7.85762e-05	0.472634	44.0034
POMT2	ENSG00000009830	8.40634e-05	0.481612	22.5348
VTA1	ENSG00000009844	6.61285e-05	0.449795	51.4427
MLXIPL	ENSG00000009950	8.7788e-05	0.486646	NA
BAZ1B	ENSG00000009954	4.43461e-05	0.404079	1.25896
RANBP9	ENSG00000010017	6.19503e-06	0.30243	6.83694
ETV7	ENSG00000010030	0.000386282	0.699823	95.7051
SPRTN	ENSG00000010072	5.2588e-05	0.42211	35.6424
METTL13	ENSG00000010165	0.000137815	0.551144	NA
DYRK4	ENSG00000010219	0.000367827	0.693287	37.4556
ZNF207	ENSG00000010244	0.000121023	0.531948	18.517
UQCRC1	ENSG00000010256	0.00200703	0.857068	33.6124
STARD3NL	ENSG00000010270	7.49474e-05	0.466324	30.1006
CD9	ENSG00000010278	0.000345274	0.685023	45.3346
HHATL	ENSG00000010282	0.000439108	0.714962	92.1451
NCAPD2	ENSG00000010292	0.000112422	0.522031	44.2503
IFFO1	ENSG00000010295	0.000470861	0.72394	26.661
GIPR	ENSG00000010310	0.00118849	0.818226	89.3741
PHF7	ENSG00000010318	6.05768e-05	0.439014	20.0771
SEMA3G	ENSG00000010319	0.000535188	0.739679	32.2029
NISCH	ENSG00000010322	0.000135605	0.548852	1.63243
STAB1	ENSG00000010327	0.000220874	0.622629	87.8802
FUZ	ENSG00000010361	0.00184422	0.851133	54.2016
SLC6A13	ENSG00000010379	0.00470906	0.90639	78.2001
IDS	ENSG00000010404	2.41019e-05	0.352654	85.7988
PRSS3	ENSG00000010438	0.000117547	0.528117	89.1151
ZNF200	ENSG00000010539	0.00632578	0.918448	72.5197
CD4	ENSG00000010610	5.33478e-05	0.423575	67.2731
LRRC23	ENSG00000010626	0.000218672	0.621615	57.3098
BTK	ENSG00000010671	0	0	25
HFE	ENSG00000010704	0.000233035	0.630555	74.0739
SCMH1	ENSG00000010803	2.89198e-05	0.365388	41.9131
FYN	ENSG00000010810	0.000190971	0.600917	19.541
HIVEP2	ENSG00000010818	1.61143e-05	0.329251	0.75899
FMO1	ENSG00000010932	0.00209315	0.860186	68.9296
TCEB3	ENSG00000011007	6.14345e-05	0.440968	80.8204
LYPLA2	ENSG00000011009	0.00609007	0.916757	32.2872
CLCN6	ENSG00000011021	5.4448e-05	0.42613	1.86133
MRC2	ENSG00000011028	3.70183e-05	0.385973	NA
NME2	ENSG00000011052	0.00152178	0.836933	42.5998
SLC6A7	ENSG00000011083	3.99169e-05	0.392885	6.42732
TSPAN9	ENSG00000011105	1.89207e-05	0.338079	39.335
BTBD7	ENSG00000011114	0.000266218	0.649412	7.75857
APBA3	ENSG00000011132	0.00138461	0.830397	96.3737
MKS1	ENSG00000011143	0.00084542	0.787649	NA
ABHD5	ENSG00000011198	0.00121684	0.819841	43.2685
KAL1	ENSG00000011201	2.27362e-05	0.349236	87.426
AKAP8L	ENSG00000011243	4.38957e-05	0.403028	39.3531
MBTD1	ENSG00000011258	1.30867e-05	0.320574	NA
UTP18	ENSG00000011260	0.000109222	0.517223	16.7761
RNF216	ENSG00000011275	0.000177986	0.590286	5.13222
TTC19	ENSG00000011295	0.000326409	0.677473	72.3209
PTBP1	ENSG00000011304	1.62089e-05	0.329702	4.40937
DPF1	ENSG00000011332	8.13252e-06	0.307464	18.8061
SYT7	ENSG00000011347	7.67083e-05	0.469629	12.7402
LARS2	ENSG00000011376	7.51302e-05	0.466774	22.4203
PIK3C2A	ENSG00000011405	0.000100016	0.505052	2.1324
PLAUR	ENSG00000011422	0.000264538	0.648774	72.2426
ANLN	ENSG00000011426	0.00021216	0.61737	88.079
WIZ	ENSG00000011451	0.000361314	0.691296	40.0578
RABGAP1	ENSG00000011454	8.18715e-06	0.307765	6.05385
DCN	ENSG00000011465	0.00898002	0.930281	29.191
QPCTL	ENSG00000011478	0.000668829	0.763833	45.5214
PPP5C	ENSG00000011485	4.76665e-05	0.411104	12.9269
CEP68	ENSG00000011523	0.00398967	0.898802	82.3866
MAP4K3	ENSG00000011566	3.15395e-05	0.372037	NA
ZBTB32	ENSG00000011590	9.21119e-05	0.494008	54.4847
TYROBP	ENSG00000011600	0.000414847	0.7082	87.1032
TMEM159	ENSG00000011638	5.00492e-05	0.415875	63.5685
GABRA3	ENSG00000011677	7.35955e-05	0.463581	11.6864
BRCA1	ENSG00000012048	0.000250707	0.641073	20.806
ERCC1	ENSG00000012061	0.000734413	0.774464	45.6358
CD22	ENSG00000012124	0.0261063	0.955749	40.7987
SEMA3B	ENSG00000012171	0	0	NA
MBTPS2	ENSG00000012174	3.38864e-05	0.378385	NA
PRICKLE3	ENSG00000012211	0.444207	0.994966	79.8817
LTF	ENSG00000012223	0.000221195	0.622929	95.187
EXTL3	ENSG00000012232	0.000130517	0.543105	1.39148
NR1H4	ENSG00000012504	0.000186755	0.597273	55.2798
ELOVL5	ENSG00000012660	0.00225874	0.864919	33.5763
ALOX5	ENSG00000012779	4.08121e-05	0.395515	4.4154
KDM5D	ENSG00000012817	0.0029692	0.882311	NA
CALCOCO1	ENSG00000012822	0.00572748	0.914203	64.2973
UBR7	ENSG00000012963	3.214e-05	0.373352	34.6485
MAP4K5	ENSG00000012983	2.84955e-05	0.364374	NA
EHD3	ENSG00000013016	0.000116075	0.526276	18.1555
PSMC4	ENSG00000013275	0.000291166	0.662071	11.3487
MAN2B2	ENSG00000013288	0.000253907	0.642951	NA
SLC7A14	ENSG00000013293	7.35658e-05	0.463506	57.1592
CLDN11	ENSG00000013297	2.13023e-05	0.345329	34.2329
SLC25A39	ENSG00000013306	0.000120174	0.530897	17.5833
MVP	ENSG00000013364	0.00341981	0.890763	NA
NUB1	ENSG00000013374	5.19935e-05	0.420683	31.6126
PGM3	ENSG00000013375	0.000268876	0.65084	55.1774
RWDD2A	ENSG00000013392	0.0154162	0.945344	29.7151
CLK1	ENSG00000013441	0.000791734	0.781639	10.5295
POLR3B	ENSG00000013503	0.00014031	0.553548	4.98765
ANGEL1	ENSG00000013523	0.0013288	0.827805	49.6054
RNF14	ENSG00000013561	0.000140159	0.55336	44.2865
DNASE1L1	ENSG00000013563	1.32091e-05	0.321025	36.6864
DDX11	ENSG00000013573	0.0384258	0.962886	97.8134
HEBP1	ENSG00000013583	0.000120371	0.531235	74.1522
GPRC5A	ENSG00000013588	0.00540727	0.911912	63.1046
MAMLD1	ENSG00000013619	0.000138044	0.551369	NA
CD6	ENSG00000013725	1.87024e-05	0.337365	42.0637
TACC3	ENSG00000013810	4.05879e-05	0.394951	23.5889
UFL1	ENSG00000014123	0.000372814	0.695015	20.9746
POLA2	ENSG00000014138	0.000409795	0.706923	20.4686
ZC3H3	ENSG00000014164	0.0370731	0.961985	97.2351
CAPN1	ENSG00000014216	0.000110289	0.519064	37.8351
ACPP	ENSG00000014257	9.11967e-05	0.492581	34.7931
MDH1	ENSG00000014641	0.000126736	0.539123	NA
SLC30A9	ENSG00000014824	3.78866e-05	0.38819	24.8359
MTMR11	ENSG00000014914	0.000776615	0.779911	NA
COX15	ENSG00000014919	0.000437308	0.714624	53.9727
CCDC88C	ENSG00000015133	0.00275441	0.877615	99.4579
YAF2	ENSG00000015153	4.98816e-06	0.299613	44.7021
ZMYND11	ENSG00000015171	4.27939e-06	0.298148	9.11993
WAS	ENSG00000015285	0	0	34.4675
DPEP1	ENSG00000015413	0.000989198	0.801886	30.7993
BID	ENSG00000015475	0.0468232	0.966455	44.7804
MATR3	ENSG00000015479	0.000228068	0.627399	NA
NPC1L1	ENSG00000015520	0.000559627	0.745126	47.0755
XYLT2	ENSG00000015532	4.85484e-05	0.413095	35.7448
RGPD5	ENSG00000015568	0	0	NA
STMN4	ENSG00000015592	0.000281625	0.65685	29.7151
NUDCD3	ENSG00000015676	1.55222e-05	0.327486	80.212
ISL1	ENSG00000016082	0.000210566	0.616093	35.4497
CHDH	ENSG00000016391	0.000297254	0.665377	12.0836
IL20RA	ENSG00000016402	3.9929e-05	0.392923	67.1887
CLCA1	ENSG00000016490	9.02384e-05	0.491041	54.2377
CLCA4	ENSG00000016602	0.00105247	0.807182	38.9133
GLT8D1	ENSG00000016864	0.000573919	0.747756	30.2994
ATP2C1	ENSG00000017260	0.000199077	0.607941	4.2648
NA	ENSG00000017373	8.80343e-06	0.309117	NA
IGF1	ENSG00000017427	0.000560614	0.745276	56.5689
SLC38A5	ENSG00000017483	0	0	34.9112
NA	ENSG00000017621	0.000253754	0.642801	NA
RALBP1	ENSG00000017797	0.000491139	0.729537	14.8244
RUFY3	ENSG00000018189	0.00186042	0.851771	42.2143
CNTN1	ENSG00000018236	2.01361e-05	0.341648	12.0414
SLC11A1	ENSG00000018280	0.000155367	0.569363	46.6719
WWTR1	ENSG00000018408	0.156774	0.984261	73.4293
AGPS	ENSG00000018510	4.3632e-05	0.402427	11.0415
CXorf56	ENSG00000018610	0	0	57.5444
ATP1A2	ENSG00000018625	2.34691e-05	0.350888	3.79495
TTC27	ENSG00000018699	0.00010781	0.515646	81.206
ZNF582	ENSG00000018869	0.00038392	0.698922	22.8239
VSIG2	ENSG00000019102	0.000554977	0.743886	60.3337
PHLDB1	ENSG00000019144	8.1619e-05	0.477818	17.0652
MARCO	ENSG00000019169	0.000184931	0.596071	NA
CYP24A1	ENSG00000019186	0.000239115	0.634424	85.8924
PRDM11	ENSG00000019485	7.13129e-06	0.304534	73.9172
SYT13	ENSG00000019505	0.00143594	0.833214	43.0637
SNAI2	ENSG00000019549	0	0	38.9013
CD74	ENSG00000019582	0.0003621	0.691559	85.6876
HGF	ENSG00000019991	5.77284e-05	0.433042	7.29474
ZRANB1	ENSG00000019995	0.363556	0.993389	10.2946
NCDN	ENSG00000020129	9.20891e-05	0.493933	3.75881
GPR124	ENSG00000020181	0.00158224	0.840089	29.5765
CCT8L1P	ENSG00000020219	0	0	NA
ZFP64	ENSG00000020256	0.0693602	0.972578	12.7583
MNAT1	ENSG00000020426	0.000794998	0.782014	NA
SAMD4A	ENSG00000020577	0.000654648	0.76203	29.2211
RUNX3	ENSG00000020633	0.000355997	0.689381	17.517
MRE11A	ENSG00000020922	0.277789	0.99106	NA
PLEKHB1	ENSG00000021300	0.00227649	0.865445	81.1638
SERPINB1	ENSG00000021355	2.91599e-05	0.366064	14.9208
CYP3A43	ENSG00000021461	0.0682192	0.972315	74.2305
SLC7A9	ENSG00000021488	0.000218161	0.621164	64.4118
SPAST	ENSG00000021574	6.28317e-05	0.443372	20.2819
NRXN3	ENSG00000021645	2.98882e-06	0.295594	1.46377
OSBPL5	ENSG00000021762	0.000131539	0.544007	19.6916
AQR	ENSG00000021776	1.5703e-05	0.327937	2.72273
CPS1	ENSG00000021826	4.3373e-05	0.401863	6.69839
C8B	ENSG00000021852	0.000647721	0.760903	87.6152
FHL1	ENSG00000022267	0	0	40.5325
RTFDC1	ENSG00000022277	4.23048e-05	0.399196	NA
GABRA1	ENSG00000022355	4.73125e-06	0.299087	18.3242
NLRP2	ENSG00000022556	0.000311506	0.671725	98.1266
SLC45A4	ENSG00000022567	0.000110886	0.519778	46.0575
RNF10	ENSG00000022840	0.000760652	0.777657	3.4275
ZNF839	ENSG00000022976	0.000194326	0.604072	97.2411
ZDHHC6	ENSG00000023041	0.000161142	0.575298	38.7266
GRAMD1B	ENSG00000023171	4.47377e-05	0.405019	54.0389
RNH1	ENSG00000023191	0.000289186	0.661207	30.8656
NDUFS1	ENSG00000023228	0.000269759	0.65129	11.9511
RB1CC1	ENSG00000023287	3.399e-05	0.378648	1.34329
ERP44	ENSG00000023318	0.000661359	0.762969	22.9926
ALAS1	ENSG00000023330	0.00014046	0.553811	36.9375
BIRC3	ENSG00000023445	5.60913e-05	0.429623	27.5104
AKAP11	ENSG00000023516	5.74296e-05	0.432215	47.3345
GLRX2	ENSG00000023572	0.000118956	0.529807	82.4227
SNAPC1	ENSG00000023608	0.0102672	0.934751	63.7612
DERA	ENSG00000023697	0.000346588	0.685774	36.6243
STRAP	ENSG00000023734	2.52269e-05	0.355847	51.6475
ABCC2	ENSG00000023839	0.000826173	0.78547	70.9716
DEF6	ENSG00000023892	2.2061e-05	0.34732	66.9719
PLEKHO1	ENSG00000023902	1.52399e-05	0.326472	45.0816
GCLM	ENSG00000023909	0.000123322	0.534954	31.4559
UBR2	ENSG00000024048	1.31662e-05	0.320837	9.30667
EHD2	ENSG00000024422	3.11836e-05	0.370797	21.7999
DEPDC1	ENSG00000024526	0.000170399	0.583675	12.3185
CCDC28A	ENSG00000024862	0.00444418	0.90361	68.4055
RRAGD	ENSG00000025039	7.53096e-05	0.467112	30.9981
HSF2	ENSG00000025156	7.47721e-05	0.46591	13.463
PHF20	ENSG00000025293	6.2209e-05	0.44232	16.2761
HSD17B6	ENSG00000025423	0.00267824	0.875887	71.4535
NR1H3	ENSG00000025434	0.000502802	0.731903	17.6375
TYMP	ENSG00000025708	0.000399962	0.703918	45.6659
NCAPH2	ENSG00000025770	0.0783575	0.974607	64.7009
TOMM34	ENSG00000025772	7.43843e-05	0.465272	45.9069
SEC63	ENSG00000025796	0.00201948	0.857706	7.29474
KPNA6	ENSG00000025800	0.000424496	0.711093	24.2877
VIM	ENSG00000026025	5.94829e-05	0.436836	12.9149
RTEL1-TNFRSF6B	ENSG00000026036	0	0	NA
FAS	ENSG00000026103	1.82536e-05	0.3359	70.6524
RNASET2	ENSG00000026297	0.000180329	0.592277	81.4409
CD44	ENSG00000026508	0.00389777	0.897487	71.7547
KCNG1	ENSG00000026559	0.000423023	0.710792	11.18
AGPAT4	ENSG00000026652	3.7573e-05	0.387626	23.9263
SLAMF7	ENSG00000026751	9.9559e-05	0.504451	83.7781
BTN3A1	ENSG00000026950	0.000546211	0.741708	79.3446
MIPEP	ENSG00000027001	0.000249895	0.640697	NA
PRKCH	ENSG00000027075	1.7877e-05	0.334623	4.59611
INSRR	ENSG00000027644	0.00116415	0.816047	62.7251
IFNGR1	ENSG00000027697	3.86863e-05	0.390181	42.6059
B4GALT7	ENSG00000027847	0.000427455	0.711882	24.8599
SH2D2A	ENSG00000027869	0.000102681	0.508696	62.3517
VRK2	ENSG00000028116	0.000490458	0.729424	76.905
TNFRSF1B	ENSG00000028137	1.93654e-05	0.339469	87.3441
VEZT	ENSG00000028203	9.29268e-05	0.495398	73.5016
POU2F2	ENSG00000028277	0.00393579	0.898013	29.944
BRD9	ENSG00000028310	4.01949e-05	0.393862	10.15
SNX1	ENSG00000028528	1.7302e-05	0.333158	9.86688
TBPL1	ENSG00000028839	0	0	51.8403
ARNTL2	ENSG00000029153	0.00452332	0.904549	39.3531
BCLAF1	ENSG00000029363	0.0273612	0.956651	99.8012
SLC39A9	ENSG00000029364	0.0379284	0.962586	44.4491
ANK1	ENSG00000029534	5.60055e-06	0.301041	1.15053
IBSP	ENSG00000029559	0.000108978	0.516923	86.5068
TFB1M	ENSG00000029639	0.000171553	0.584801	79.0916
RABEP1	ENSG00000029725	2.84182e-05	0.364149	5.16836
HMGB3	ENSG00000029993	0.00148524	0.835581	30.3254
NUP160	ENSG00000030066	8.77489e-05	0.486608	2.10228
BAK1	ENSG00000030110	0.000482122	0.726907	57.1472
MUSK	ENSG00000030304	0.000305959	0.669246	NA
IKZF2	ENSG00000030419	0.000416595	0.708689	29.8175
GRN	ENSG00000030582	0.000316962	0.673754	49.5753
FAM13B	ENSG00000031003	1.51162e-05	0.326096	6.03578
ARHGAP31	ENSG00000031081	1.35659e-05	0.321964	14.3847
NA	ENSG00000031544	0	0	NA
CENPQ	ENSG00000031691	0.000422973	0.710755	56.0087
SARS	ENSG00000031698	1.73525e-05	0.333459	16.0834
RANBP3	ENSG00000031823	7.74304e-06	0.306149	9.96928
ARID4A	ENSG00000032219	0.00125401	0.822509	5.85507
TSSC1	ENSG00000032389	0.154773	0.984148	34.51
PNPLA6	ENSG00000032444	0.000135471	0.548627	1.50593
IFT88	ENSG00000032742	0.000159711	0.574021	77.5917
ALG1	ENSG00000033011	4.11808e-05	0.396754	89.4946
ZCCHC8	ENSG00000033030	5.45748e-05	0.426318	NA
ABCF2	ENSG00000033050	2.18835e-05	0.346907	6.13216
CHPF2	ENSG00000033100	0.00132218	0.827242	96.2773
LRRC7	ENSG00000033122	6.51126e-05	0.447992	1.73484
FUT8	ENSG00000033170	3.91061e-05	0.391195	32.8053
UBA6	ENSG00000033178	5.02855e-05	0.416513	12.2342
GAB2	ENSG00000033327	2.57455e-05	0.357011	24.872
ATP6V0A1	ENSG00000033627	0.000112526	0.522219	35.0762
PIAS1	ENSG00000033800	8.57913e-06	0.308666	4.5419
SLC4A7	ENSG00000033867	0.000123176	0.534691	3.34317
APBA2	ENSG00000034053	8.48683e-05	0.482551	22.7757
NA	ENSG00000034063	0	0	NA
MAP2K3	ENSG00000034152	0.000473431	0.724691	NA
EFCAB1	ENSG00000034239	8.63322e-05	0.484655	29.7151
TMSB10	ENSG00000034510	0.000229033	0.628151	56.8219
ASTE1	ENSG00000034533	0.186599	0.986627	77.6821
RNF19A	ENSG00000034677	0.00533142	0.911461	8.25251
PEX3	ENSG00000034693	7.08352e-05	0.458322	26.1551
GABARAPL2	ENSG00000034713	0.0129827	0.940836	58.8639
MYOC	ENSG00000034971	0.00241162	0.86875	NA
SH3YL1	ENSG00000035115	0.000465079	0.722249	78.3507
FAM136A	ENSG00000035141	0.00595826	0.915706	68.2007
VCL	ENSG00000035403	4.76815e-05	0.411217	5.98157
DEPDC1B	ENSG00000035499	0.000153062	0.567259	12.8607
DAPK2	ENSG00000035664	0.000161003	0.57511	87.1152
NSMAF	ENSG00000035681	0.000108912	0.516848	7.86097
ADSS	ENSG00000035687	0.000214912	0.61906	20.8542
STAP1	ENSG00000035720	5.99089e-05	0.437812	24.2877
TIMP2	ENSG00000035862	3.2868e-05	0.375493	53.292
RFC1	ENSG00000035928	0.000135423	0.548589	16.3544
TBC1D23	ENSG00000036054	0.000154144	0.568198	11.2343
CUL3	ENSG00000036257	1.94001e-05	0.339694	10.6921
MYOM2	ENSG00000036448	0.000548524	0.742346	NA
OTC	ENSG00000036473	0	0	63.1657
CYP46A1	ENSG00000036530	1.82245e-05	0.335675	9.40305
ZZZ3	ENSG00000036549	7.59828e-05	0.46839	22.2095
SLC18A1	ENSG00000036565	0.000273314	0.653056	92.9583
USP2	ENSG00000036672	4.65272e-05	0.408737	37.8953
CASR	ENSG00000036828	3.06824e-05	0.369595	3.92145
TUBG2	ENSG00000037042	0.000106268	0.513429	20.0952
RPL26L1	ENSG00000037241	7.08202e-05	0.458247	55.6593
FLT4	ENSG00000037280	8.72219e-06	0.308967	10.4331
NSUN2	ENSG00000037474	3.2097e-05	0.373239	12.9028
FBXO42	ENSG00000037637	6.76487e-05	0.452913	6.12011
MFAP3	ENSG00000037749	5.06456e-05	0.417415	NA
MRI1	ENSG00000037757	0.000494688	0.730288	NA
METTL1	ENSG00000037897	0.0001976	0.606964	NA
HOXC8	ENSG00000037965	2.86211e-05	0.364712	48.5453
AGA	ENSG00000038002	4.53648e-05	0.406371	82.0734
PI4K2B	ENSG00000038210	6.52841e-05	0.448443	28.7633
BOD1L1	ENSG00000038219	0.000259743	0.645994	97.6688
MAT2B	ENSG00000038274	4.16645e-05	0.397618	NA
TLL1	ENSG00000038295	9.20211e-05	0.493821	5.72857
EDC4	ENSG00000038358	0.000203311	0.611134	1.55412
TRIO	ENSG00000038382	0.000209019	0.615041	0.108427
VCAN	ENSG00000038427	2.59797e-05	0.357763	26.5044
CLEC16A	ENSG00000038532	8.00189e-05	0.475039	78.1338
MSR1	ENSG00000038945	0.129534	0.981819	NA
CDH1	ENSG00000039068	1.85865e-05	0.337065	18.9025
SKIV2L2	ENSG00000039123	8.73512e-05	0.486045	5.4816
DNAH5	ENSG00000039139	9.37449e-05	0.496262	98.4579
ZFYVE16	ENSG00000039319	0.000110346	0.519101	83.766
FAM65A	ENSG00000039523	0.000829681	0.785958	26.6369
C6	ENSG00000039537	0.00196598	0.85549	94.9642
RAI14	ENSG00000039560	5.40692e-05	0.425078	27.8537
SOX30	ENSG00000039600	1.57059e-05	0.327974	80.9108
PNKP	ENSG00000039650	0.00202829	0.858007	28.2814
BEST2	ENSG00000039987	0.00141361	0.831937	32.8534
PHLPP2	ENSG00000040199	6.0184e-05	0.43815	7.99349
SPDL1	ENSG00000040275	0.000246325	0.638781	NA
STAU2	ENSG00000040341	0.377988	0.993727	13.6076
PQLC2	ENSG00000040487	7.74947e-05	0.470906	39.094
CTNS	ENSG00000040531	4.07294e-05	0.395327	86.7719
RTN4R	ENSG00000040608	0.00296263	0.882161	29.7813
PHF23	ENSG00000040633	0.000740957	0.775403	17.1134
CDH10	ENSG00000040731	0.000145353	0.559333	3.25884
INPP4A	ENSG00000040933	0.000279983	0.656061	10.0657
RAB27B	ENSG00000041353	1.79985e-05	0.334924	37.052
PSMA4	ENSG00000041357	4.93947e-05	0.41456	42.5998
MYO16	ENSG00000041515	3.98071e-05	0.392585	NA
LSG1	ENSG00000041802	6.79461e-05	0.453514	90.3259
PARP3	ENSG00000041880	0.00170345	0.845498	96.0785
TNC	ENSG00000041982	3.44158e-05	0.379625	79.8747
THAP3	ENSG00000041988	0.000674396	0.764622	85.2599
FAM65C	ENSG00000042062	0.00135736	0.829195	92.1752
TDP1	ENSG00000042088	0.0925037	0.976785	49.6838
AIFM2	ENSG00000042286	0.000265298	0.649187	88.5067
C2orf83	ENSG00000042304	0.196091	0.986965	79.5795
SPATA7	ENSG00000042317	0.000262594	0.647496	82.1577
MED17	ENSG00000042429	7.28325e-05	0.462154	NA
RETSAT	ENSG00000042445	0.00408526	0.899966	96.2412
CAPG	ENSG00000042493	0.00122512	0.820443	65.5924
AP2S1	ENSG00000042753	7.15862e-05	0.459787	51.8884
USH2A	ENSG00000042781	0.000232853	0.630367	98.8615
ZPBP	ENSG00000042813	3.27743e-05	0.375117	31.721
TG	ENSG00000042832	0.000168259	0.581721	99.3976
ADAM28	ENSG00000042980	0.000277192	0.654897	96.958
BARX2	ENSG00000043039	0.000362511	0.691672	80.4771
DCUN1D1	ENSG00000043093	0	0	55.6593
JADE2	ENSG00000043143	4.99898e-05	0.415687	NA
ZIC2	ENSG00000043355	0	0	21.5168
LCP2	ENSG00000043462	8.11408e-05	0.477029	42.63
TRIT1	ENSG00000043514	0.000868813	0.790353	60.7012
ADRB1	ENSG00000043591	0.000104913	0.512114	33.4498
GUCA2B	ENSG00000044012	1.91155e-05	0.33883	49.3103
CUL7	ENSG00000044090	0.000325695	0.677135	52.3221
CTNNA1	ENSG00000044115	5.97511e-05	0.437474	3.62629
PHKA2	ENSG00000044446	0.000103177	0.509372	22.1893
CNTLN	ENSG00000044459	0.000257236	0.644454	82.3264
EPHA3	ENSG00000044524	6.73813e-05	0.452312	9.45124
HSPA5	ENSG00000044574	0.000133418	0.546373	13.6257
DSG2	ENSG00000046604	0.000153786	0.567935	67.7911
GEMIN8	ENSG00000046647	0	0	54.5858
OFD1	ENSG00000046651	0.00201086	0.857293	6.21302
GPM6B	ENSG00000046653	0.00195577	0.855152	14.497
MAGEC2	ENSG00000046774	1.66415e-05	0.330904	NA
PREX2	ENSG00000046889	0.00010302	0.509034	9.38498
WDR37	ENSG00000047056	2.00707e-05	0.341347	8.33082
YTHDC2	ENSG00000047188	5.09768e-05	0.418166	10.7102
CTPS2	ENSG00000047230	8.24497e-05	0.479058	18.1953
ATP6V1H	ENSG00000047249	0.000138476	0.55197	16.505
POLR2B	ENSG00000047315	5.38626e-05	0.42474	3.51786
FAM214A	ENSG00000047346	4.3013e-05	0.401112	42.0155
ARAP2	ENSG00000047365	0.000103734	0.510236	60.7614
TPR	ENSG00000047410	0.000123303	0.534916	0.777062
CP	ENSG00000047457	0.000151195	0.565193	41.7987
KIAA0556	ENSG00000047578	0.000478924	0.726231	76.8749
DTNBP1	ENSG00000047579	0.0324405	0.959956	58.3459
XK	ENSG00000047597	0	0	28.6982
ANO2	ENSG00000047617	0.000378409	0.697269	NA
C12orf4	ENSG00000047621	0.000955539	0.798693	14.6859
SCML1	ENSG00000047634	0	0	42.6036
WWC3	ENSG00000047644	1.46147e-05	0.324593	97.6331
ARHGAP6	ENSG00000047648	0.0001864	0.597198	13.1657
FAM184B	ENSG00000047662	4.7712e-05	0.411254	NA
MAP4	ENSG00000047849	0.00526341	0.910897	NA
GOPC	ENSG00000047932	2.04946e-05	0.34285	27.5767
ROS1	ENSG00000047936	0.000416034	0.708538	70.0018
USP28	ENSG00000048028	9.52059e-05	0.498366	5.03584
HDAC9	ENSG00000048052	4.08486e-05	0.39589	9.8729
TSPAN17	ENSG00000048140	0.000183292	0.594906	42.2987
NOP16	ENSG00000048162	0.646044	0.997671	80.5192
CC2D2A	ENSG00000048342	0.0120897	0.93892	93.91
RRM2B	ENSG00000048392	0.0134393	0.941888	19.3482
ZNF800	ENSG00000048405	7.94574e-05	0.474212	37.0701
TNFRSF17	ENSG00000048462	6.97697e-05	0.456782	80.5192
SNX29	ENSG00000048471	6.19857e-05	0.441907	9.0597
LMO3	ENSG00000048540	0.000119661	0.530333	42.6661
MRPS10	ENSG00000048544	6.0396e-05	0.438526	NA
GUCA1A	ENSG00000048545	9.24866e-05	0.494647	71.068
RSF1	ENSG00000048649	3.45075e-06	0.296345	11.2704
VPS13D	ENSG00000048707	0.000117304	0.527741	0.0963797
CELF2	ENSG00000048740	0	0	15.3424
FAM120A	ENSG00000048828	0.000133888	0.546824	1.38546
R3HDM1	ENSG00000048991	5.46001e-05	0.426393	27.7453
COL9A2	ENSG00000049089	0.0132004	0.941249	96.8014
KITLG	ENSG00000049130	0.00017077	0.58375	35.5521
ERCC8	ENSG00000049167	0.000184815	0.596033	42.2565
ADAMTS6	ENSG00000049192	7.54858e-05	0.467413	31.9559
H6PD	ENSG00000049239	0.0733643	0.973743	99.5904
VAMP3	ENSG00000049245	0.000169088	0.58266	34.8232
PER3	ENSG00000049246	0.000307656	0.670035	61.2433
UTS2	ENSG00000049247	0.000574514	0.747831	84.5311
TNFRSF9	ENSG00000049249	4.20016e-05	0.398219	59.5085
EPN3	ENSG00000049283	0.000706414	0.769994	95.4581
NA	ENSG00000049319	0	0	NA
LTBP1	ENSG00000049323	2.82625e-05	0.36351	45.2443
RCN1	ENSG00000049449	3.13017e-05	0.371098	89.9645
ELN	ENSG00000049540	0.000133659	0.546636	51.0572
RFC2	ENSG00000049541	0.000748771	0.776154	33.4076
ARID1B	ENSG00000049618	0.000278519	0.655347	0.638516
CLPTM1L	ENSG00000049656	0.000190856	0.600766	13.704
NEDD4L	ENSG00000049759	7.10595e-05	0.458848	20.547
FOXP3	ENSG00000049768	0.000186068	0.59686	55.1775
PPP1R3F	ENSG00000049769	0.000751462	0.776455	54.2899
HEXB	ENSG00000049860	0.000124894	0.536794	40.4976
PTCD2	ENSG00000049883	0.00542371	0.912099	20.041
KIAA2022	ENSG00000050030	0.000717776	0.771722	1.77515
JKAMP	ENSG00000050130	6.66888e-05	0.450997	27.0405
3	ENSG00000050165	0.000134641	0.547688	52.5872
ARHGEF5	ENSG00000050327	0.00306076	0.884189	NA
NFE2L3	ENSG00000050344	0.00314119	0.885767	58.3941
MCUR1	ENSG00000050393	0.00591933	0.915443	NA
LIMA1	ENSG00000050405	0.000319075	0.674468	14.71
LETMD1	ENSG00000050426	0.000316921	0.673716	51.3523
SLC4A8	ENSG00000050438	1.92888e-05	0.339243	2.66249
LAMC3	ENSG00000050555	9.02537e-05	0.491154	99.4338
PTGER3	ENSG00000050628	0.00204396	0.858533	44.2082
TNIP3	ENSG00000050730	3.93537e-05	0.391683	49.6356
MAPK9	ENSG00000050748	0.00192112	0.853837	NA
COL23A1	ENSG00000050767	0.00181851	0.849968	66.8333
BCAR1	ENSG00000050820	0.00102534	0.804966	85.778
FAM160A2	ENSG00000051009	5.08323e-05	0.417866	61.2855
HERPUD1	ENSG00000051108	0.000774098	0.779573	36.4255
HOMER3	ENSG00000051128	3.71196e-05	0.386387	64.7371
RAD51	ENSG00000051180	0.000188975	0.599113	37.5098
POLQ	ENSG00000051341	0.00182027	0.850081	75.2063
PIK3CB	ENSG00000051382	0.000228175	0.62755	3.53593
CYBA	ENSG00000051523	0.000457055	0.720371	NA
THOC3	ENSG00000051596	0.000322344	0.67597	68.6826
HEBP2	ENSG00000051620	0.00300056	0.883025	88.0067
MPHOSPH9	ENSG00000051825	9.57646e-05	0.499343	NA
PLEKHA5	ENSG00000052126	1.41973e-05	0.323692	8.27059
PRSS8	ENSG00000052344	0.000371296	0.694602	22.2637
SIKE1	ENSG00000052723	0.00137022	0.829796	43.9492
RRP12	ENSG00000052749	5.28949e-05	0.422599	35.3171
FNIP2	ENSG00000052795	9.75464e-05	0.501784	54.7557
MSMO1	ENSG00000052802	0.000310664	0.671462	NA
TTC17	ENSG00000052841	6.40775e-05	0.445776	6.35504
ALX4	ENSG00000052850	4.23961e-05	0.399684	34.4618
FSTL4	ENSG00000053108	3.58637e-05	0.383494	88.2959
FOXN3	ENSG00000053254	9.09198e-05	0.49213	37.2327
METTL24	ENSG00000053328	0.000576957	0.748469	NA
AKR7A2	ENSG00000053371	0.000158044	0.57218	93.5365
MRTO4	ENSG00000053372	3.35707e-06	0.296157	NA
NNAT	ENSG00000053438	0.00831121	0.927801	54.6112
USE1	ENSG00000053501	5.48888e-05	0.426919	53.7257
MCF2L2	ENSG00000053524	0.000148597	0.562939	NA
NRIP2	ENSG00000053702	0.0057524	0.914278	67.8272
LAMA3	ENSG00000053747	0.000203433	0.611284	96.3075
AP5M1	ENSG00000053770	0.00103503	0.80583	30.6126
ANAPC4	ENSG00000053900	8.19861e-05	0.478269	5.1021
KCNQ1	ENSG00000053918	0.000140676	0.554187	12.3788
TRAPPC3	ENSG00000054116	0.000375035	0.695767	58.3218
THRAP3	ENSG00000054118	3.68406e-06	0.296908	7.22246
PHPT1	ENSG00000054148	0.00303273	0.883889	52.1234
ENTPD2	ENSG00000054179	0.00155774	0.838887	53.1896
LY75	ENSG00000054219	0.000410961	0.707111	32.9197
ARID4B	ENSG00000054267	3.70572e-05	0.386049	3.03596
OPN3	ENSG00000054277	3.55414e-05	0.382255	60.7734
SDCCAG8	ENSG00000054282	0.000792888	0.781864	19.5169
PTPRN	ENSG00000054356	0.000553979	0.743699	16.1557
HHAT	ENSG00000054392	0.000196117	0.605499	45.8105
KIF1B	ENSG00000054523	2.37313e-05	0.351677	0.897536
FOXC1	ENSG00000054598	0	0	NA
TBC1D22A	ENSG00000054611	5.49869e-05	0.427294	54.9605
SYNE2	ENSG00000054654	0.00391093	0.897712	98.8796
PLEKHH1	ENSG00000054690	0.000833612	0.786259	98.1748
ATP9A	ENSG00000054793	1.09007e-05	0.314526	2.73478
SPO11	ENSG00000054796	0.000549489	0.742647	52.5089
CBLN4	ENSG00000054803	0.00022645	0.62631	30.6247
CHRDL2	ENSG00000054938	0.000171599	0.584914	35.2087
FAM168A	ENSG00000054965	2.21149e-05	0.347508	27.8056
RELT	ENSG00000054967	0.000542864	0.740994	84.8563
GALC	ENSG00000054983	4.6084e-05	0.407648	60.0084
NOP58	ENSG00000055044	0.000347112	0.686	12.4932
SZRD1	ENSG00000055070	0.00150567	0.836295	66.8634
KCNH2	ENSG00000055118	0.000173442	0.586191	13.21
CUL1	ENSG00000055130	1.67589e-05	0.331355	6.77068
FAM114A2	ENSG00000055147	0.000232398	0.630254	11.3969
CYFIP2	ENSG00000055163	0.202331	0.987454	NA
TAB2	ENSG00000055208	2.50999e-05	0.355584	7.50557
GINM1	ENSG00000055211	0.000976805	0.800759	64.3997
EIF2AK2	ENSG00000055332	0.000101928	0.507832	5.92133
USP36	ENSG00000055483	0.000137582	0.550994	92.0908
KMT2C	ENSG00000055609	0.00629359	0.91811	NA
MCOLN3	ENSG00000055732	0.000797625	0.782202	NA
CCDC85A	ENSG00000055813	7.19307e-05	0.460426	12.0475
PUM2	ENSG00000055917	0.000440639	0.715488	2.77092
MRPL43	ENSG00000055950	0.000320038	0.674881	NA
ITIH4	ENSG00000055955	8.40328e-05	0.481575	81.8384
ITIH1	ENSG00000055957	0.105552	0.978776	86.031
C4orf27	ENSG00000056050	0.000525925	0.73705	63.3877
ZFR	ENSG00000056097	1.12989e-05	0.315315	3.25282
ZNF280C	ENSG00000056277	1.27635e-05	0.319447	20.1183
NPFFR2	ENSG00000056291	0.0237254	0.95357	90.9283
PHF21B	ENSG00000056487	3.88321e-05	0.390444	83.4649
TRAF1	ENSG00000056558	3.66204e-05	0.38511	88.3621
RC3H2	ENSG00000056586	0.251065	0.989895	4.80694
NA	ENSG00000056661	0.57327	0.996694	NA
IL17RB	ENSG00000056736	0.0317491	0.959468	93.5064
TRAF3IP2	ENSG00000056972	0.000121912	0.533075	90.7415
GYG2	ENSG00000056998	0.00027587	0.654483	89.9408
DCBLD2	ENSG00000057019	0.000136678	0.550092	87.049
SERPINB3	ENSG00000057149	0.00030511	0.668758	89.5247
SOAT1	ENSG00000057252	0.000178129	0.590474	30.0705
PKP2	ENSG00000057294	0.000372346	0.69494	90.35
MSH4	ENSG00000057468	9.39679e-05	0.496488	NA
F7	ENSG00000057593	0.00028912	0.66117	72.4896
GDI2	ENSG00000057608	8.66416e-06	0.308816	28.7212
PRDM1	ENSG00000057657	0.000354944	0.68893	47.8104
ATG5	ENSG00000057663	6.64081e-05	0.450284	45.949
TMCC3	ENSG00000057704	4.68075e-05	0.409526	75.0979
PITHD1	ENSG00000057757	0.00121861	0.819954	41.0397
MTA3	ENSG00000057935	1.84552e-05	0.336839	NA
USP13	ENSG00000058056	0.000122172	0.533376	18.9748
ATP11B	ENSG00000058063	7.92294e-05	0.473573	75.9713
LAMC2	ENSG00000058085	8.54759e-05	0.483228	89.1272
CDK14	ENSG00000058091	1.34694e-05	0.321663	24.9322
SEC61A1	ENSG00000058262	1.49348e-05	0.32557	13.4992
PPP1R12A	ENSG00000058272	0.000142717	0.556591	26.1069
RASGRF1	ENSG00000058335	8.88556e-05	0.488637	1.89748
CAMK2B	ENSG00000058404	0.000548229	0.742234	29.0886
CROCC	ENSG00000058453	0.000204142	0.611848	99.9096
POLR3E	ENSG00000058600	0.000807313	0.783329	14.3003
ATP2B4	ENSG00000058668	0.000173738	0.586454	15.7159
ZC3H11A	ENSG00000058673	8.52309e-06	0.308591	16.6074
RIOK2	ENSG00000058729	9.15714e-05	0.493069	77.1219
YIPF1	ENSG00000058799	0.00381542	0.89636	63.8395
NDC1	ENSG00000058804	0.000134693	0.547763	NA
DGKG	ENSG00000058866	4.34832e-05	0.402051	77.3568
FLYWCH1	ENSG00000059122	0.00110472	0.81139	99.4518
UNKL	ENSG00000059145	0.000249341	0.640359	NA
TBXAS1	ENSG00000059377	0.000438083	0.714736	96.6147
PARP12	ENSG00000059378	9.55833e-05	0.49908	48.979
ALDH18A1	ENSG00000059573	6.57984e-05	0.449307	18.023
TARBP1	ENSG00000059588	0.00014693	0.561098	29.95
GATB	ENSG00000059691	0.000263175	0.647722	NA
MXD1	ENSG00000059728	6.60157e-05	0.449645	NA
CDK17	ENSG00000059758	5.40444e-05	0.424965	20.3421
DNAJC25	ENSG00000059769	0.000132029	0.544533	42.4733
SLC2A3	ENSG00000059804	0.000113003	0.522933	87.5971
PSD	ENSG00000059915	0.000206463	0.613538	23.9865
CTDP1	ENSG00000060069	3.22826e-05	0.37369	12.4209
YBX3	ENSG00000060138	5.59485e-05	0.429285	NA
STYK1	ENSG00000060140	9.26448e-05	0.49491	62.2191
WNK1	ENSG00000060237	0.0745542	0.974005	2.58418
CCAR1	ENSG00000060339	8.94833e-05	0.489613	4.90332
OGFR	ENSG00000060491	0.000147964	0.562225	NA
GNA15	ENSG00000060558	1.5722e-05	0.328124	49.0211
CREB3L3	ENSG00000060566	0.00396557	0.898313	54.2558
PIGV	ENSG00000060642	0.133956	0.982082	24.4503
PTPRU	ENSG00000060656	6.07604e-05	0.439465	9.22234
SNRNP40	ENSG00000060688	2.99781e-05	0.368206	24.354
RIMBP2	ENSG00000060709	7.63399e-05	0.468878	63.5383
COL11A1	ENSG00000060718	7.56022e-05	0.467676	3.4516
QSER1	ENSG00000060749	0.000135543	0.548777	8.96332
MPC1	ENSG00000060762	0.000246514	0.638932	NA
ACAA1	ENSG00000060971	0.000368037	0.693362	56.8038
BCAT1	ENSG00000060982	4.78154e-05	0.411405	54.6533
HDAC7	ENSG00000061273	0.000111803	0.521055	20.306
LZTS1	ENSG00000061337	3.43293e-05	0.379325	85.0431
PRDM6	ENSG00000061455	0.000169287	0.582961	NA
WNT8A	ENSG00000061492	5.11876e-05	0.418692	61.3276
SPAG4	ENSG00000061656	0.006122	0.916983	68.3393
NCKAP1	ENSG00000061676	2.63559e-06	0.295218	2.74682
MRPS35	ENSG00000061794	9.17322e-05	0.493407	NA
GUCY1B3	ENSG00000061918	0.379456	0.993764	17.3484
SFSWAP	ENSG00000061936	5.53106e-06	0.30089	14.0714
TNK2	ENSG00000061938	0.00015925	0.573532	88.7416
MON2	ENSG00000061987	5.37235e-05	0.424364	NA
CDH3	ENSG00000062038	4.49636e-05	0.405695	20.5349
ARSF	ENSG00000062096	0.000423318	0.71083	95.858
GPBP1	ENSG00000062194	0.000117708	0.528305	32.8293
DGAT2	ENSG00000062282	0.00259533	0.873934	84.7539
ZNF112	ENSG00000062370	2.93529e-05	0.36659	NA
CS	ENSG00000062485	3.26588e-05	0.374591	41.4553
LTK	ENSG00000062524	0.10213	0.978363	95.5424
MRPS24	ENSG00000062582	8.79359e-05	0.486984	NA
ELMO2	ENSG00000062598	7.12235e-05	0.459224	7.0056
WAPAL	ENSG00000062650	5.20416e-06	0.299951	6.03578
VMP1	ENSG00000062716	2.68635e-05	0.360017	40.859
APPBP2	ENSG00000062725	1.22018e-05	0.317644	25.3057
POLD1	ENSG00000062822	0.000142263	0.556102	69.5741
SEZ6	ENSG00000063015	0.000334931	0.681116	75.4834
EIF4B	ENSG00000063046	4.7223e-06	0.298974	21.5891
SLC6A16	ENSG00000063127	0.00101636	0.80429	40.1301
GLTSCR1	ENSG00000063169	9.9734e-05	0.504602	NA
SPHK2	ENSG00000063176	0.00933607	0.931746	51.1596
RPL18	ENSG00000063177	6.15289e-05	0.44108	31.3656
CA11	ENSG00000063180	9.92769e-06	0.31216	22.7095
ISOC2	ENSG00000063241	0.000154537	0.568386	63.4359
U2AF2	ENSG00000063244	0.00207423	0.859622	12.7703
EPN1	ENSG00000063245	0.000181683	0.593441	27.1188
MED29	ENSG00000063322	0.000308713	0.670824	NA
AHRR	ENSG00000063438	5.66873e-05	0.430788	57.8158
GSC2	ENSG00000063515	0.00245209	0.869802	NA
ZNF275	ENSG00000063587	9.72242e-05	0.501334	NA
MTMR1	ENSG00000063601	0.000131215	0.543706	NA
GPC1	ENSG00000063660	0.000256675	0.644228	86.2779
ADCK1	ENSG00000063761	0.000118629	0.529432	50.2018
HAGH	ENSG00000063854	0.000772365	0.779422	73.6401
RNF4	ENSG00000063978	7.53419e-06	0.305699	77.8146
CASP8	ENSG00000064012	0.000149648	0.563991	32.7751
LIMCH1	ENSG00000064042	0.000363965	0.692273	18.2519
ASUN	ENSG00000064102	2.54322e-05	0.356298	11.5957
TM7SF3	ENSG00000064115	0.00031252	0.672101	39.4314
DLX3	ENSG00000064195	0.000139214	0.552609	47.9971
SPA17	ENSG00000064199	0.0043519	0.902746	36.7388
TSPAN32	ENSG00000064201	0.000307935	0.670448	95.1569
WISP2	ENSG00000064205	0.000440583	0.715375	59.5988
DMRT3	ENSG00000064218	0.000282798	0.657301	69.7488
ST3GAL6	ENSG00000064225	0.000207958	0.614365	40.7566
ATP2C2	ENSG00000064270	0.00125464	0.822621	57.7857
NGFR	ENSG00000064300	4.41578e-05	0.403666	19.5048
CDON	ENSG00000064309	8.16309e-05	0.477856	21.0469
TAF2	ENSG00000064313	3.45781e-05	0.379963	5.6081
HIPK2	ENSG00000064393	0.000247989	0.639683	NA
TNPO3	ENSG00000064419	9.02099e-05	0.490966	3.15644
MEF2BNB-MEF2B	ENSG00000064489	0.000116945	0.527328	NA
RFXANK	ENSG00000064490	0.00051295	0.734646	67.3996
TMEM161A	ENSG00000064545	0.00110139	0.811089	84.9828
LPAR2	ENSG00000064547	8.06038e-05	0.476391	21.6915
CTSA	ENSG00000064601	0.000127795	0.540325	15.999
SUGP2	ENSG00000064607	5.35517e-05	0.424139	18.1917
SLC12A2	ENSG00000064651	0.000134441	0.547463	3.17451
SNX24	ENSG00000064652	0.000169798	0.583412	28.9862
EYA2	ENSG00000064655	5.5565e-05	0.428571	76.905
CNN2	ENSG00000064666	0.00012304	0.534503	44.678
ABCA7	ENSG00000064687	0.00533079	0.911423	99.2229
SNCAIP	ENSG00000064692	0.00289644	0.880621	47.5875
DDX20	ENSG00000064703	0.000158938	0.573157	57.9182
BTBD1	ENSG00000064726	0.00177252	0.848353	30.8295
FAR2	ENSG00000064763	2.18933e-05	0.346982	19.7819
BCAS1	ENSG00000064787	8.8913e-05	0.488862	87.2056
POU1F1	ENSG00000064835	0.00527224	0.910973	39.1543
CHI3L2	ENSG00000064886	0.000101797	0.507682	90.7415
SBNO2	ENSG00000064932	0.000106956	0.514519	NA
PMS1	ENSG00000064933	0.33447	0.992863	79.5554
HMG20B	ENSG00000064961	0.000686511	0.767064	72.0318
CALCRL	ENSG00000064989	2.18721e-05	0.346869	34.5883
TAF11	ENSG00000064995	2.65414e-05	0.35904	58.7133
ANKS1A	ENSG00000064999	1.38508e-05	0.32279	53.6233
AP3D1	ENSG00000065000	3.90636e-05	0.391045	1.76495
ZNF76	ENSG00000065029	0.000245296	0.63803	56.8339
SLC9A3R2	ENSG00000065054	0.000219706	0.622103	NA
NTHL1	ENSG00000065057	0.0447108	0.965591	76.4653
UHRF1BP1	ENSG00000065060	0.0002752	0.653957	90.9162
GNAI3	ENSG00000065135	0.0019194	0.8538	39.7024
IPO5	ENSG00000065150	5.74886e-05	0.432441	6.74056
OAT	ENSG00000065154	6.55294e-05	0.448894	23.5528
WDR3	ENSG00000065183	0.00193515	0.854401	4.09012
PKN2	ENSG00000065243	1.8409e-05	0.336614	11.9933
WDR18	ENSG00000065268	8.63948e-06	0.308779	64.2853
TRAM2	ENSG00000065308	1.70317e-05	0.332256	25.6912
NTN1	ENSG00000065320	3.12688e-05	0.37106	26.0587
GLP2R	ENSG00000065325	0.000127129	0.539612	58.641
MCM10	ENSG00000065328	7.70374e-05	0.47023	NA
DGKA	ENSG00000065357	0.000205832	0.613163	11.7101
ERBB3	ENSG00000065361	0.000298724	0.665978	2.46371
ROPN1	ENSG00000065371	0.000295896	0.664175	70.315
ANKRD44	ENSG00000065413	0.0509053	0.967807	28.2754
KARS	ENSG00000065427	0.000275232	0.653995	7.99952
ADAT1	ENSG00000065457	0.000425725	0.711356	74.4594
PDIA5	ENSG00000065485	4.16469e-05	0.397581	19.8843
TBC1D22B	ENSG00000065491	2.81779e-05	0.363285	13.4329
NDUFB4	ENSG00000065518	0.0249069	0.95451	49.3103
SPEN	ENSG00000065526	0.00107877	0.809286	0.801157
MYLK	ENSG00000065534	3.76978e-05	0.387814	NA
ZC3H15	ENSG00000065548	0.000107465	0.515307	36.0641
MAP2K4	ENSG00000065559	0	0	NA
TMEM206	ENSG00000065600	0.00218462	0.862815	26.0105
SNAP91	ENSG00000065609	1.96148e-05	0.34007	20.6253
SLK	ENSG00000065613	4.00088e-05	0.393223	17.8724
CYB5R4	ENSG00000065615	0.000189414	0.599677	36.7749
COL17A1	ENSG00000065618	7.60265e-05	0.468427	96.4279
GSTO2	ENSG00000065621	0.000608575	0.753916	76.2544
SEC61A2	ENSG00000065665	5.32709e-05	0.423425	13.3064
PRKCQ	ENSG00000065675	2.40667e-05	0.352579	12.3426
TLE2	ENSG00000065717	0.000480695	0.726569	8.2224
ASB1	ENSG00000065802	0.00027864	0.655535	21.3602
FAM107B	ENSG00000065809	0.000172565	0.58559	17.4026
ME1	ENSG00000065833	0.00399628	0.89899	NA
TBC1D1	ENSG00000065882	0.000190074	0.60009	31.8957
CDK13	ENSG00000065883	0.000127918	0.5404	15.9027
MTHFD2	ENSG00000065911	0.00161799	0.841741	NA
SLC9A7	ENSG00000065923	3.03206e-05	0.368919	11.9822
FOXJ2	ENSG00000065970	0.000150201	0.564442	20.2156
YBX1	ENSG00000065978	0.000597137	0.751812	38.1604
PDE4A	ENSG00000065989	0.00010313	0.509222	29.4741
PPP2R5A	ENSG00000066027	2.17833e-05	0.346719	16.2038
CTNNA2	ENSG00000066032	0.0136926	0.942564	3.24077
ELAVL1	ENSG00000066044	7.43072e-05	0.465046	16.6978
TIE1	ENSG00000066056	9.90509e-05	0.503888	4.74068
DIP2B	ENSG00000066084	3.27477e-05	0.375005	1.33727
SMARCD1	ENSG00000066117	6.26264e-05	0.443034	24.354
KDM4A	ENSG00000066135	2.54266e-05	0.356223	6.49358
NFYC	ENSG00000066136	0.000637359	0.75895	38.4615
ZMYND12	ENSG00000066185	0.000258934	0.645355	74.0739
SLC9A3	ENSG00000066230	1.06582e-05	0.313963	66.8815
NGEF	ENSG00000066248	6.07453e-05	0.439352	9.10186
ASPM	ENSG00000066279	0.000444578	0.716727	25.6069
CD84	ENSG00000066294	0.00338385	0.890049	81.8083
ELOVL1	ENSG00000066322	0.00581968	0.914729	33.5763
SPI1	ENSG00000066336	0.146808	0.983284	58.7555
ZNRD1	ENSG00000066379	2.31669e-05	0.350287	52.4185
MPPED2	ENSG00000066382	0.00053129	0.73844	NA
CLDN18	ENSG00000066405	0.000526497	0.737275	29.9319
ZBTB11	ENSG00000066422	0.000115244	0.525638	8.07783
ATXN3	ENSG00000066427	0.177522	0.986101	56.9303
GOLGA5	ENSG00000066455	2.6834e-05	0.359904	67.8875
FGFR2	ENSG00000066468	4.69755e-05	0.409902	2.77694
LRRC40	ENSG00000066557	0.00118889	0.818301	90.5006
ISOC1	ENSG00000066583	0.000115185	0.525563	14.0534
EML1	ENSG00000066629	6.13532e-05	0.440667	5.331
TRMT11	ENSG00000066651	0.000419608	0.709515	49.4067
THUMPD1	ENSG00000066654	6.66783e-05	0.450922	52.2137
MSANTD3	ENSG00000066697	0.000209768	0.615642	NA
KIF26A	ENSG00000066735	0.000321071	0.675332	NA
ATG2B	ENSG00000066739	0.00010397	0.510687	51.6957
ARFGEF1	ENSG00000066777	0.000807682	0.783367	1.10234
ACSM2B	ENSG00000066813	0.136513	0.982382	95.5665
ZFAT	ENSG00000066827	0.00033003	0.678938	66.8032
MTFR1	ENSG00000066855	0.000308427	0.670636	NA
STAG3	ENSG00000066923	7.72474e-05	0.470568	2.86127
FECH	ENSG00000066926	4.05842e-05	0.394914	48.4368
MYO9A	ENSG00000066933	0.000224467	0.624807	NA
DDX3Y	ENSG00000067048	0	0	NA
PFKP	ENSG00000067057	0.000262361	0.647233	5.20451
IDI1	ENSG00000067064	7.2305e-05	0.460877	24.4262
SP100	ENSG00000067066	0.0664024	0.971752	36.4918
KLF6	ENSG00000067082	0	0	53.2076
PPAP2A	ENSG00000067113	2.71185e-05	0.36073	50.8584
NEO1	ENSG00000067141	2.1633e-05	0.346381	2.06614
TRAM1	ENSG00000067167	2.322e-05	0.3504	46.19
PHKA1	ENSG00000067177	0.000210642	0.61628	9.31953
TNFRSF1A	ENSG00000067182	0.00016534	0.579092	50.2319
CACNB1	ENSG00000067191	0.000145669	0.559821	14.5895
EVI5	ENSG00000067208	0.0001636	0.577702	50.7018
STOML1	ENSG00000067221	0.000247952	0.639608	32.5101
PKM	ENSG00000067225	0.000200741	0.609068	16.252
DHX29	ENSG00000067248	0.000513049	0.734683	5.39124
DNTTIP2	ENSG00000067334	0.000176464	0.589121	12.5414
METTL22	ENSG00000067365	3.60672e-05	0.383907	NA
TP53BP1	ENSG00000067369	3.13427e-05	0.371286	4.72261
TRO	ENSG00000067445	0.000775524	0.77976	20.5621
RRP15	ENSG00000067533	0.0326497	0.960182	81.8686
RHOA	ENSG00000067560	0	0	47.2502
DHX8	ENSG00000067596	8.08861e-05	0.476691	3.40341
PRKCZ	ENSG00000067606	9.60983e-05	0.499793	8.10795
ZFY	ENSG00000067646	0.00467867	0.905976	NA
IARS2	ENSG00000067704	0.000855265	0.788738	15.216
SYT1	ENSG00000067715	6.71319e-05	0.451936	15.6436
NAV3	ENSG00000067798	1.47051e-05	0.324931	0.271068
IDH3G	ENSG00000067829	0.000355533	0.68908	30.6213
ROGDI	ENSG00000067836	0.00319448	0.886969	56.3882
PDZD4	ENSG00000067840	1.67897e-05	0.331468	5.76923
ATP2B3	ENSG00000067842	4.89468e-06	0.29935	6.6568
ROCK1	ENSG00000067900	0.000203188	0.610909	5.27679
CBFB	ENSG00000067955	0.000159422	0.573758	42.1119
PDK3	ENSG00000067992	0.000117039	0.527366	58.284
HYAL2	ENSG00000068001	0.000118125	0.528831	7.95735
HDAC4	ENSG00000068024	0.00398868	0.898764	19.1254
RASSF1	ENSG00000068028	0.00231708	0.866384	48.9368
FGFR3	ENSG00000068078	0.000233879	0.631043	50.2379
IFI35	ENSG00000068079	0.000854669	0.788626	89.4464
HEATR6	ENSG00000068097	0.00134656	0.828707	14.1498
COASY	ENSG00000068120	0.000732064	0.774163	8.77056
PLEKHH3	ENSG00000068137	0.000281479	0.656662	17.8905
MEF2A	ENSG00000068305	0.0197055	0.950265	NA
OTUD5	ENSG00000068308	0	0	26.4793
TFE3	ENSG00000068323	0.00406752	0.899703	50.2959
TBC1D25	ENSG00000068354	4.25807e-05	0.40021	10.9467
ACSL4	ENSG00000068366	0	0	6.80473
INPP5A	ENSG00000068383	1.73745e-05	0.333534	67.8272
GPKOW	ENSG00000068394	8.74717e-05	0.486233	75.8876
GRIPAP1	ENSG00000068400	3.46702e-05	0.380376	14.2012
FTSJ1	ENSG00000068438	0	0	57.6923
PRR11	ENSG00000068489	0.00261148	0.874347	78.2724
REEP1	ENSG00000068615	3.46401e-05	0.380226	65.8213
ATP11A	ENSG00000068650	0.000193204	0.60317	20.4626
POLR1A	ENSG00000068654	1.91682e-05	0.338868	2.62635
LAPTM4A	ENSG00000068697	0.000277954	0.655159	30.956
TTC7A	ENSG00000068724	0.000233248	0.630592	60.7433
IP6K2	ENSG00000068745	0.000922439	0.795763	25.6009
STON1-GTF2A1L	ENSG00000068781	9.89653e-05	0.503738	34.3594
SRBD1	ENSG00000068784	0.000286229	0.659404	82.9227
NA	ENSG00000068793	0.000245804	0.638481	NA
KIF2A	ENSG00000068796	2.76568e-05	0.361932	23.9805
RASGRP2	ENSG00000068831	0.000140861	0.554525	35.5701
PSME4	ENSG00000068878	2.10644e-05	0.344653	1.02403
IFT80	ENSG00000068885	0.0011374	0.813643	39.6121
SIRT2	ENSG00000068903	0.000136559	0.549979	84.3022
ERLEC1	ENSG00000068912	0.000105241	0.51249	52.9667
PPP2R5B	ENSG00000068971	4.91314e-05	0.414147	9.2645
PYGM	ENSG00000068976	0.000808554	0.783517	83.3384
PAGE1	ENSG00000068985	2.03833e-05	0.342474	77.071
PITX1	ENSG00000069011	0.462419	0.99538	34.1004
TRPC7	ENSG00000069018	0.000178111	0.590399	5.08403
MAST4	ENSG00000069020	0.000547471	0.742008	NA
GPR116	ENSG00000069122	6.44368e-06	0.302881	63.0143
SDK2	ENSG00000069188	0.000209454	0.615492	95.181
ADAM7	ENSG00000069206	0.000757771	0.777206	96.6026
NUP133	ENSG00000069248	0.000245066	0.63788	16.8725
NUCKS1	ENSG00000069275	3.69136e-05	0.385673	35.6725
VPS35	ENSG00000069329	6.62135e-05	0.449983	8.33082
DNAJA2	ENSG00000069345	8.37957e-06	0.308253	25.0226
BCL3	ENSG00000069399	4.55173e-05	0.406747	73.4474
KCNAB2	ENSG00000069424	4.83495e-05	0.412757	31.3294
ABCC9	ENSG00000069431	0.000371339	0.69464	1.51196
GAL	ENSG00000069482	0.000152563	0.566771	71.6041
CLEC2D	ENSG00000069493	6.80721e-06	0.30382	85.4948
FUNDC1	ENSG00000069509	9.2337e-05	0.494347	62.7219
MAOB	ENSG00000069535	3.27517e-05	0.37508	NA
RORA	ENSG00000069667	0.000105274	0.512603	22.5107
DRD4	ENSG00000069696	0.00364863	0.894369	NA
TGFBR3	ENSG00000069702	2.42709e-05	0.353217	47.1779
KIAA1107	ENSG00000069712	0.000160493	0.574847	NA
PLA2G10	ENSG00000069764	3.46502e-05	0.380301	NA
HES2	ENSG00000069812	0.000535739	0.739754	NA
ATP1B3	ENSG00000069849	9.17822e-05	0.493483	25.0949
NEDD4	ENSG00000069869	6.48821e-05	0.447504	36.6303
PIGB	ENSG00000069943	0.000533198	0.739116	63.6769
MAPK6	ENSG00000069956	6.90683e-05	0.455655	NA
GNB5	ENSG00000069966	0.000384027	0.698959	14.9208
RAB27A	ENSG00000069974	0.00105543	0.807445	56.0087
CECR5	ENSG00000069998	0.000127238	0.539687	37.6423
UFD1L	ENSG00000070010	0	0	26.2936
LRP6	ENSG00000070018	5.2461e-05	0.42181	11.5294
GUCY2C	ENSG00000070019	0.000119671	0.530371	14.7401
SCT	ENSG00000070031	0	0	NA
PHRF1	ENSG00000070047	0.000827569	0.785696	18.1375
IKBKAP	ENSG00000070061	0.000132172	0.544758	26.0647
NUCB2	ENSG00000070081	0.000103131	0.50926	26.896
PFN2	ENSG00000070087	0.00242151	0.869051	39.4976
PTPN3	ENSG00000070159	5.85732e-05	0.434807	10.6018
SPTB	ENSG00000070182	0.000531324	0.738515	87.6815
DAPP1	ENSG00000070190	0.00019755	0.606889	35.1967
FGF10	ENSG00000070193	0	0	48.1597
SLC44A1	ENSG00000070214	4.61043e-05	0.407723	27.4682
TMEM260	ENSG00000070269	0.000148024	0.5623	NA
SMG6	ENSG00000070366	1.04467e-05	0.313549	23.4143
EXOC5	ENSG00000070367	1.57882e-05	0.32835	37.817
CLTCL1	ENSG00000070371	0.174455	0.985951	98.6928
FGF22	ENSG00000070388	0.0631472	0.970775	NA
FSTL3	ENSG00000070404	7.54944e-05	0.467451	NA
DGCR2	ENSG00000070413	0.000193056	0.60302	70.5921
RNF126	ENSG00000070423	2.95443e-05	0.367379	NA
MNT	ENSG00000070444	8.45132e-05	0.482063	NA
ZXDC	ENSG00000070476	2.82212e-05	0.363397	51.4487
JMJD6	ENSG00000070495	0.000318039	0.674129	14.3425
POLB	ENSG00000070501	0.00118335	0.817625	71.5439
ST6GALNAC1	ENSG00000070526	0.000842195	0.787161	70.0259
WIPI1	ENSG00000070540	4.54582e-05	0.406596	62.7914
FRMPD1	ENSG00000070601	0.000140206	0.55351	89.8801
GBA2	ENSG00000070610	0.000595966	0.751625	13.3546
NDST1	ENSG00000070614	1.42288e-05	0.323842	3.92747
ASNS	ENSG00000070669	8.75436e-05	0.48642	9.35486
AP3M2	ENSG00000070718	0.000332312	0.679914	15.5894
CNGB1	ENSG00000070729	0.000377853	0.696931	93.6148
ST6GALNAC2	ENSG00000070731	0.000134919	0.548026	70.4717
CHAT	ENSG00000070748	2.51042e-05	0.355659	94.3437
PABPC1	ENSG00000070756	0	0	94.5244
TESK2	ENSG00000070759	0.000383379	0.698772	85.4587
CFAP20	ENSG00000070761	0.000527471	0.737463	NA
CSNK2A2	ENSG00000070770	0	0	53.9305
PTPN21	ENSG00000070778	0.000145793	0.559934	17.8122
EIF2B3	ENSG00000070785	0.000725331	0.772924	73.3631
CAMK2A	ENSG00000070808	3.59432e-06	0.296721	13.3185
TCOF1	ENSG00000070814	9.39024e-05	0.496375	91.7957
CDC42	ENSG00000070831	2.39428e-05	0.352203	44.6479
OSBPL3	ENSG00000070882	8.96434e-05	0.489914	10.8789
EPHA8	ENSG00000070886	9.97005e-05	0.504527	90.1934
SLC12A3	ENSG00000070915	0.000186347	0.597047	92.127
RAD18	ENSG00000070950	0.000321999	0.675782	50.3825
ATP2B1	ENSG00000070961	5.72615e-06	0.301303	3.50581
TRPM5	ENSG00000070985	0.000169093	0.582698	96.5484
NCK2	ENSG00000071051	0.000930758	0.796176	7.7405
MAP4K4	ENSG00000071054	0.000668327	0.763758	NA
MGAT4A	ENSG00000071073	0.000122263	0.533564	NA
RPL31	ENSG00000071082	0.0476822	0.966943	44.1178
WDR1	ENSG00000071127	0.000118298	0.529056	8.18023
SNX13	ENSG00000071189	0.000101717	0.507494	9.32474
MS4A12	ENSG00000071203	0.112566	0.979866	NA
ARHGAP10	ENSG00000071205	0.000336173	0.681417	72.8631
RPS6KA2	ENSG00000071242	1.22697e-05	0.317944	2.57816
ING3	ENSG00000071243	0.000112553	0.522294	18.3061
VASH1	ENSG00000071246	0.000100788	0.505954	23.0468
LMCD1	ENSG00000071282	0.0013268	0.82758	89.8319
WBSCR22	ENSG00000071462	6.09624e-05	0.439728	28.7633
SEL1L	ENSG00000071537	0.000417098	0.708952	23.9323
TRIP13	ENSG00000071539	3.42364e-05	0.379062	21.6613
ATP6AP1	ENSG00000071553	0.00275439	0.877578	18.0473
TCF3	ENSG00000071564	0.00394348	0.898126	78.9832
TRIB2	ENSG00000071575	1.58946e-05	0.32865	35.4497
DAZAP1	ENSG00000071626	7.1641e-05	0.459938	10.4632
MBD3	ENSG00000071655	0.000494174	0.730138	NA
PRLH	ENSG00000071677	0.215173	0.987942	61.171
HLTF	ENSG00000071794	0.000495774	0.730401	68.9115
FAM50A	ENSG00000071859	2.31587e-05	0.350212	21.7456
FAM3A	ENSG00000071889	0	0	39.7929
CPSF1	ENSG00000071894	0.000170094	0.583524	1.6746
MYO3B	ENSG00000071909	0.00013643	0.549754	NA
CYBRD1	ENSG00000071967	2.93487e-05	0.366553	81.3927
CDH19	ENSG00000071991	0.000997461	0.802675	47.0815
PDCD2	ENSG00000071994	0.00025111	0.641411	58.5808
SLC6A15	ENSG00000072041	0.000142128	0.555952	30.3175
RDH11	ENSG00000072042	0.000808359	0.783442	27.2694
PRKACA	ENSG00000072062	7.04798e-05	0.457646	18.8422
LPHN1	ENSG00000072071	0.000111428	0.520304	2.03
SPP2	ENSG00000072080	0.000196615	0.60595	54.2196
ACTN1	ENSG00000072110	0.00070724	0.770144	2.41552
ZFYVE26	ENSG00000072121	0.000554241	0.743736	14.3485
RPS6KA6	ENSG00000072133	0.000121015	0.531911	46.1538
EPN2	ENSG00000072134	6.10178e-05	0.439991	16.4087
PTPN18	ENSG00000072135	0.000297729	0.665452	73.2426
LIMS2	ENSG00000072163	0.000246384	0.638894	39.082
ASIC4	ENSG00000072182	4.05372e-05	0.394764	70.9897
SPEG	ENSG00000072195	0.00945395	0.932534	10.144
LNX1	ENSG00000072201	0.000190267	0.600466	43.9913
ALDH3A2	ENSG00000072210	0.276859	0.990985	22.854
TFRC	ENSG00000072274	1.09054e-05	0.314564	10.7945
SREBF1	ENSG00000072310	0.000241584	0.635964	64.3817
TRPC5	ENSG00000072315	9.76165e-05	0.501859	5.32544
AFF4	ENSG00000072364	2.79801e-05	0.362721	5.44546
UBE2D1	ENSG00000072401	0	0	46.1117
MPP5	ENSG00000072415	0.000259081	0.645581	NA
RHOBTB1	ENSG00000072422	0.000270024	0.651591	11.1921
NA	ENSG00000072444	0.000166494	0.580294	NA
SMC1A	ENSG00000072501	1.35027e-05	0.321701	2.66272
HSD17B10	ENSG00000072506	0	0	48.5207
MARK2	ENSG00000072518	8.66527e-05	0.484993	NA
HMMR	ENSG00000072571	0.00102163	0.804628	89.7175
CHFR	ENSG00000072609	3.64876e-05	0.384659	26.2996
TRHDE	ENSG00000072657	9.88776e-05	0.50355	3.10222
P4HA2	ENSG00000072682	0.000354888	0.688892	20.5771
FCGR2B	ENSG00000072694	5.44412e-06	0.300665	60.659
NFATC3	ENSG00000072736	0.0907811	0.976673	12.7583
TRNT1	ENSG00000072756	0.000303906	0.668232	38.1363
ACADVL	ENSG00000072778	0.000535944	0.739829	13.457
STK10	ENSG00000072786	0.000142996	0.556966	35.9195
FBXW11	ENSG00000072803	0.000304644	0.66857	11.0415
ACAP1	ENSG00000072818	0.000132003	0.544495	31.7752
CRMP1	ENSG00000072832	1.58317e-06	0.294241	8.54768
EVC	ENSG00000072840	2.82743e-05	0.363548	98.3495
DERL2	ENSG00000072849	7.80756e-05	0.472033	34.7208
SIDT1	ENSG00000072858	0.00154842	0.838173	80.5253
NDE1	ENSG00000072864	6.45053e-05	0.44679	20.6253
MRVI1	ENSG00000072952	0.0465574	0.966305	NA
TMEM38A	ENSG00000072954	4.28311e-05	0.400924	27.5947
AP1M1	ENSG00000072958	0.000647377	0.76079	17.8062
PVR	ENSG00000073008	0.000307523	0.66996	94.0365
NA	ENSG00000073009	0.0142969	0.943391	NA
XRCC1	ENSG00000073050	8.38834e-05	0.481199	91.2837
SCARB1	ENSG00000073060	6.63649e-05	0.450246	27.4682
CYP2W1	ENSG00000073067	0.000893466	0.79287	NA
MCM2	ENSG00000073111	6.06685e-05	0.439202	NA
MOV10L1	ENSG00000073146	5.69279e-05	0.431389	NA
PANX2	ENSG00000073150	0.00019906	0.607866	16.505
SELO	ENSG00000073169	0.000375069	0.695804	93.5968
TP63	ENSG00000073282	2.10337e-05	0.344502	6.2948
ALPK1	ENSG00000073331	0.000476784	0.725593	94.6509
LLGL2	ENSG00000073350	0.000162166	0.576274	96.3496
PDE8A	ENSG00000073417	9.34354e-05	0.495774	17.4327
CLCN4	ENSG00000073464	0	0	3.69822
NLE1	ENSG00000073536	0.000381892	0.698283	57.7495
SDHA	ENSG00000073578	8.16405e-05	0.477931	66.1466
SMARCE1	ENSG00000073584	0.00205553	0.859021	15.8966
FNDC8	ENSG00000073598	0.000426252	0.711468	62.2975
GSDMB	ENSG00000073605	0.229466	0.988618	86.0069
KDM5A	ENSG00000073614	4.76052e-05	0.411029	2.91549
ADAM11	ENSG00000073670	1.86919e-05	0.33729	29.2512
PPP2R3A	ENSG00000073711	0.00114982	0.81477	82.0071
FERMT2	ENSG00000073712	8.00068e-05	0.474926	13.3847
ABCB11	ENSG00000073734	5.93265e-05	0.43646	10.0054
DHRS9	ENSG00000073737	0.00450994	0.904249	75.5436
CD5L	ENSG00000073754	0.00301577	0.883475	32.0282
PTGS2	ENSG00000073756	0	0	25.5888
IGF2BP2	ENSG00000073792	9.29298e-05	0.495436	11.2644
MAP3K13	ENSG00000073803	8.37748e-05	0.481086	NA
ST6GAL1	ENSG00000073849	5.3136e-05	0.423125	21.9264
TBX21	ENSG00000073861	2.72111e-05	0.361031	35.3533
FRY	ENSG00000073910	3.07714e-05	0.369858	0.114451
PICALM	ENSG00000073921	3.57131e-05	0.382743	16.4448
NSF	ENSG00000073969	0.000119628	0.530221	NA
GLI2	ENSG00000074047	1.31732e-05	0.320874	71.839
CLASP1	ENSG00000074054	0.000120678	0.531535	NA
MRPS34	ENSG00000074071	0.00285168	0.879494	NA
NOTCH3	ENSG00000074181	4.02882e-05	0.394125	20.3964
CLNS1A	ENSG00000074201	0.000102321	0.508358	62.1167
PPP2R2C	ENSG00000074211	9.56229e-05	0.499155	19.5289
TEAD2	ENSG00000074219	0.000415037	0.708275	31.9378
EED	ENSG00000074266	6.44258e-06	0.302844	37.0038
CDHR2	ENSG00000074276	8.17701e-05	0.478044	86.3442
SNCB	ENSG00000074317	2.12666e-05	0.345291	42.6119
TSG101	ENSG00000074319	3.51397e-05	0.381428	42.8227
C17orf85	ENSG00000074356	0.000342083	0.683934	59.9904
ATP2A3	ENSG00000074370	8.05729e-05	0.476278	3.82507
CA12	ENSG00000074410	0.0128908	0.940573	57.3098
MGLL	ENSG00000074416	0.000175944	0.588633	NA
NTN4	ENSG00000074527	3.22428e-05	0.373577	23.7154
BCS1L	ENSG00000074582	0.00108654	0.810112	45.2202
NUAK1	ENSG00000074590	8.09618e-05	0.476804	16.3846
DPP8	ENSG00000074603	3.43021e-05	0.379249	15.1256
SLC24A1	ENSG00000074621	0.000353222	0.688329	52.4366
ZNF532	ENSG00000074657	0.000218354	0.621427	5.65629
SCARF1	ENSG00000074660	0.000269402	0.651065	97.7592
LMAN1	ENSG00000074695	0.000144294	0.558431	27.4682
PTPLAD1	ENSG00000074696	0.000243615	0.636866	66.2731
IPCEF1	ENSG00000074706	8.00108e-05	0.474963	48.973
ZZEF1	ENSG00000074755	1.76871e-05	0.334172	3.48774
NOX3	ENSG00000074771	0.000542026	0.740806	37.317
ENO1	ENSG00000074800	0.000321933	0.675707	10.5295
SLC12A1	ENSG00000074803	0.000141601	0.555313	54.2799
C19orf10	ENSG00000074842	0.0994616	0.977837	53.292
ANO8	ENSG00000074855	0.000152439	0.566583	8.34889
TUBE1	ENSG00000074935	0.000634233	0.758236	58.8278
ARHGEF10L	ENSG00000074964	4.67401e-05	0.409188	21.4204
TXK	ENSG00000074966	6.10387e-05	0.440066	58.6892
WSCD2	ENSG00000075035	0.00107188	0.80861	14.7702
KCNQ2	ENSG00000075043	1.28363e-05	0.319748	9.42714
TACR2	ENSG00000075073	0.000287735	0.660418	92.3499
ACTR6	ENSG00000075089	0.00174776	0.847489	34.5883
TIPIN	ENSG00000075131	8.70768e-05	0.485669	78.5796
SRI	ENSG00000075142	0.000262399	0.647309	57.0448
EIF4G3	ENSG00000075151	0.000432973	0.713384	5.11415
NUP37	ENSG00000075188	0.000120433	0.531347	62.4541
SEMA3A	ENSG00000075213	1.11211e-05	0.314977	63.2974
GTSE1	ENSG00000075218	8.47411e-05	0.482326	97.2833
SEMA3C	ENSG00000075223	2.8522e-05	0.364412	20.0108
TTC38	ENSG00000075234	0.00243816	0.869652	90.2295
ACAT1	ENSG00000075239	0.000109913	0.5182	21.6613
GRAMD4	ENSG00000075240	2.36657e-06	0.294767	8.92115
CELSR1	ENSG00000075275	0.000316539	0.673566	5.29486
WNT8B	ENSG00000075290	0.000114475	0.524511	23.354
ZNF638	ENSG00000075292	3.66097e-05	0.385072	2.32516
SLC25A40	ENSG00000075303	0.00570833	0.91409	59.5567
TIMM21	ENSG00000075336	0.000674748	0.764735	53.6594
ADD2	ENSG00000075340	0.00013729	0.550731	16.5231
FGF4	ENSG00000075388	0.000115982	0.526201	NA
RASAL2	ENSG00000075391	0.000451897	0.718831	5.01175
VPS9D1	ENSG00000075399	5.43078e-05	0.425754	NA
ZNF37A	ENSG00000075407	0.00115773	0.815296	32.7149
MARK3	ENSG00000075413	7.55141e-05	0.467488	NA
SLC25A3	ENSG00000075415	0.000729685	0.7736	11.4873
FNDC3B	ENSG00000075420	3.74012e-05	0.387025	14.8786
FOSL2	ENSG00000075426	0	0	19.041
CACNG5	ENSG00000075429	0.00783362	0.926036	66.996
CACNG4	ENSG00000075461	2.44124e-05	0.353743	33.0522
FRYL	ENSG00000075539	0.000120244	0.531009	0.566231
TMEM131	ENSG00000075568	1.71264e-05	0.332519	20.9626
FSCN1	ENSG00000075618	0.000788641	0.781338	33.3173
ACTB	ENSG00000075624	5.13984e-05	0.41903	12.3487
MOCOS	ENSG00000075643	0.000141754	0.555426	NA
PLD1	ENSG00000075651	0.000246962	0.63927	72.5498
ATP12A	ENSG00000075673	0.00182645	0.850306	72.1884
WDR62	ENSG00000075702	0.000139657	0.552872	46.3827
DLG1	ENSG00000075711	3.9991e-05	0.393111	32.0041
RAB7A	ENSG00000075785	0	0	33.7389
BCAP29	ENSG00000075790	0.00198527	0.856129	45.2382
SEC31B	ENSG00000075826	0.000923677	0.795838	97.8857
SART3	ENSG00000075856	2.44026e-05	0.353706	5.24065
ARHGAP15	ENSG00000075884	0.000203019	0.610796	27.1188
TUBA3D	ENSG00000075886	0.000262662	0.647534	59.0145
PAX2	ENSG00000075891	7.5542e-05	0.467563	12.5053
EXOSC7	ENSG00000075914	0.000129129	0.54164	52.0451
KIFAP3	ENSG00000075945	4.69804e-05	0.410015	9.80061
MKRN2	ENSG00000075975	6.64279e-05	0.450434	NA
MCM6	ENSG00000076003	4.26155e-05	0.400323	NA
REXO2	ENSG00000076043	0.000158004	0.572067	64.9238
RBM7	ENSG00000076053	0.142961	0.983058	26.9743
RBMS2	ENSG00000076067	0.00147035	0.835017	15.1135
BAZ2A	ENSG00000076108	0.0106475	0.935652	5.65026
PTPN23	ENSG00000076201	6.62364e-05	0.450058	27.1731
MLH1	ENSG00000076242	0.00193448	0.854363	NA
UNG	ENSG00000076248	0.000858349	0.789076	74.0136
FMO4	ENSG00000076258	0.000391989	0.701664	72.4896
KLHL20	ENSG00000076321	0.0012602	0.822959	13.5775
RGS11	ENSG00000076344	0.00352528	0.892528	98.1085
SLC46A1	ENSG00000076351	0.945744	0.999474	NA
PLXNA2	ENSG00000076356	3.31777e-05	0.37677	1.81917
SPAG5	ENSG00000076382	0.00584503	0.915029	52.5571
ANKRD13A	ENSG00000076513	0.000622537	0.756283	25.119
TPD52	ENSG00000076554	0.000683232	0.766463	72.4113
ACACB	ENSG00000076555	0.000150692	0.564742	1.27703
TRAF4	ENSG00000076604	0.00407023	0.899816	24.4985
PAG1	ENSG00000076641	7.40353e-05	0.464483	39.4735
GPATCH1	ENSG00000076650	9.03459e-05	0.491341	53.6895
ICAM3	ENSG00000076662	0.00057524	0.747981	78.2784
NT5C2	ENSG00000076685	0.000124412	0.536231	15.8123
MCAM	ENSG00000076706	0.000376111	0.69633	NA
GPC4	ENSG00000076716	2.1369e-05	0.345517	30.9172
MBNL3	ENSG00000076770	5.58956e-05	0.42921	NA
CAMSAP3	ENSG00000076826	6.61964e-05	0.449946	3.99976
RAP1GAP	ENSG00000076864	0.000145331	0.559295	14.4208
XAB2	ENSG00000076924	2.55837e-05	0.356748	7.14415
ARHGEF1	ENSG00000076928	0.000261376	0.646707	10.1801
STXBP2	ENSG00000076944	9.19233e-05	0.493746	77.658
MAP2K7	ENSG00000076984	2.62341e-05	0.358213	NA
NMRK2	ENSG00000077009	0.00439877	0.903122	74.5437
DGKD	ENSG00000077044	0.000123194	0.534766	1.53003
CTTNBP2	ENSG00000077063	0.000576797	0.748357	4.96958
ACTL6B	ENSG00000077080	0.00399346	0.898877	16.1496
RARB	ENSG00000077092	3.28239e-05	0.375343	15.8364
TOP2B	ENSG00000077097	6.01264e-05	0.438075	11.2885
TM9SF3	ENSG00000077147	9.14431e-05	0.492844	20.8
NFKB2	ENSG00000077150	1.89714e-05	0.338304	11.7523
UBE2T	ENSG00000077152	0.000252958	0.642388	38.1122
PPP1R12B	ENSG00000077157	0.0190284	0.949551	27.7453
DNAJC10	ENSG00000077232	8.86294e-05	0.488186	37.2809
GTF3C1	ENSG00000077235	0.000180814	0.592803	1.93362
IL4R	ENSG00000077238	0.00296255	0.882123	80.8506
USP33	ENSG00000077254	4.24826e-05	0.400023	5.42136
PAK3	ENSG00000077264	8.46116e-05	0.482176	22.3373
CAPN6	ENSG00000077274	5.62457e-05	0.429811	22.4852
DCX	ENSG00000077279	0.000146472	0.560648	34.9112
SNRPA	ENSG00000077312	0.000216212	0.620112	9.79459
SPAG6	ENSG00000077327	0.00626685	0.918035	11.1138
EXOSC5	ENSG00000077348	0.000150318	0.564517	84.1757
DYNC1I2	ENSG00000077380	0.00630082	0.918185	56.3581
APBB1IP	ENSG00000077420	7.93136e-05	0.473874	27.167
LRCH4	ENSG00000077454	0.000174576	0.587281	13.0173
FAM76B	ENSG00000077458	4.00166e-05	0.393299	21.9987
SIRT6	ENSG00000077463	0.000132936	0.54596	41.3469
TYR	ENSG00000077498	0.00115157	0.814883	34.9557
POLD3	ENSG00000077514	6.10535e-05	0.440104	75.5135
ACTN2	ENSG00000077522	7.0713e-06	0.304346	28.426
CAPZB	ENSG00000077549	5.86354e-05	0.434957	31.0704
GPR137B	ENSG00000077585	0.000180832	0.59284	58.0146
NAALAD2	ENSG00000077616	0.000218925	0.62169	81.3264
JADE1	ENSG00000077684	6.51472e-05	0.448142	NA
SLC25A43	ENSG00000077713	0.000103656	0.510124	78.8462
UBE2A	ENSG00000077721	0	0	47.1893
FGFR1	ENSG00000077782	0.000748858	0.776192	4.49973
FKBP6	ENSG00000077800	0.00138961	0.830698	82.1457
NA	ENSG00000077809	0.00185074	0.851433	NA
SMC1B	ENSG00000077935	3.1527e-05	0.371962	15.1919
FBLN1	ENSG00000077942	0.00345455	0.891251	45.8346
ITGA8	ENSG00000077943	5.26955e-05	0.422336	75.4593
CST7	ENSG00000077984	0.000487856	0.728786	39.8109
MAP2	ENSG00000078018	0.000162852	0.576988	NA
PIAS2	ENSG00000078043	0.000663408	0.76327	8.84284
AMPH	ENSG00000078053	2.79247e-05	0.362533	48.5031
ARAF	ENSG00000078061	0.000278093	0.655197	14.9408
MCCC1	ENSG00000078070	0.000299897	0.666429	NA
LAMP3	ENSG00000078081	0.000169291	0.582998	71.2849
FAP	ENSG00000078098	0.000646269	0.760603	15.5412
NEBL	ENSG00000078114	0.000526364	0.737238	63.3998
ACER3	ENSG00000078124	9.81363e-06	0.311897	59.2314
UBE2K	ENSG00000078140	0	0	57.9604
PIK3C3	ENSG00000078142	0.000337661	0.682093	3.43955
N4BP2	ENSG00000078177	0.00029388	0.663161	38.5158
C12orf5	ENSG00000078237	7.47485e-05	0.465798	57.0448
TULP3	ENSG00000078246	0.00131765	0.826753	69.4175
SYNJ2	ENSG00000078269	0.000194738	0.604523	61.9661
ADCY2	ENSG00000078295	5.55643e-06	0.300965	15.487
PPP2R5C	ENSG00000078304	3.54524e-05	0.382029	18.2459
RBFOX1	ENSG00000078328	2.89175e-05	0.365351	10.6259
GNB1	ENSG00000078369	0	0	28.4923
HOXA9	ENSG00000078399	0.000812961	0.784005	60.5024
EDN1	ENSG00000078401	2.07611e-05	0.343676	82.3746
MLLT10	ENSG00000078403	8.83542e-05	0.487735	NA
ZCWPW1	ENSG00000078487	0.000497222	0.730551	85.4286
ADCYAP1R1	ENSG00000078549	0.000113205	0.523158	31.5644
FGF20	ENSG00000078579	8.17145e-06	0.307614	66.761
P2RY10	ENSG00000078589	7.87478e-05	0.472897	13.6095
ITM2A	ENSG00000078596	4.64852e-05	0.408662	26.7751
NRD1	ENSG00000078618	0.000116898	0.52729	4.22866
VDAC3	ENSG00000078668	5.63899e-05	0.429961	36.6243
PCM1	ENSG00000078674	0.000402589	0.704519	41.5216
TNRC6C	ENSG00000078687	5.92991e-05	0.436347	16.6797
CBFA2T2	ENSG00000078699	0.000393139	0.702115	11.7282
BRINP1	ENSG00000078725	5.76667e-05	0.432966	NA
ITCH	ENSG00000078747	7.50543e-05	0.466474	7.49352
PKD2L2	ENSG00000078795	0.000186211	0.596935	76.6761
TP53INP2	ENSG00000078804	0.000302656	0.667556	59.141
SDF4	ENSG00000078808	5.51938e-05	0.427632	29.3296
MYH7B	ENSG00000078814	0.000328578	0.678111	NA
BPIFB2	ENSG00000078898	0.000145828	0.559971	93.904
TP73	ENSG00000078900	8.32049e-06	0.308027	7.56581
TOLLIP	ENSG00000078902	0.000122679	0.533939	85.8442
UBE2D4	ENSG00000078967	0.000248472	0.639796	37.6664
CLUL1	ENSG00000079101	0.000121435	0.532474	70.0199
RUNX1T1	ENSG00000079102	7.3783e-05	0.463882	4.53587
CDH17	ENSG00000079112	0.000109396	0.517449	43.4432
THOC1	ENSG00000079134	2.93585e-05	0.366628	24.5226
FKBP7	ENSG00000079150	0.00227531	0.865407	41.9372
OSBPL6	ENSG00000079156	7.47506e-05	0.465835	6.03578
SLC1A3	ENSG00000079215	3.35499e-05	0.377522	25.896
XRCC5	ENSG00000079246	0	0	26.661
LXN	ENSG00000079257	0.000245014	0.637805	91.374
SP140	ENSG00000079263	0.000148676	0.563052	84.7238
MKNK1	ENSG00000079277	0.000536156	0.739867	NA
TNS1	ENSG00000079308	6.21941e-05	0.442282	96.2894
REXO1	ENSG00000079313	4.65488e-05	0.408813	93.4161
SAR1A	ENSG00000079332	0.00018366	0.595244	41.5999
CDC14A	ENSG00000079335	6.9846e-05	0.456857	31.727
RAPGEF3	ENSG00000079337	0.000540224	0.740581	59.6892
CEACAM1	ENSG00000079385	0.000199464	0.608204	62.6589
SENP1	ENSG00000079387	0.000308199	0.670486	20.9566
DUSP13	ENSG00000079393	0.0782314	0.974569	93.3558
CIC	ENSG00000079432	0.000274916	0.65377	0.686706
LIPE	ENSG00000079435	0.00439068	0.902971	61.7553
FDFT1	ENSG00000079459	3.24182e-05	0.374028	17.3845
PAFAH1B3	ENSG00000079462	0.00697712	0.922204	19.3482
OPHN1	ENSG00000079482	0	0	43.4911
AFM	ENSG00000079557	0.00164622	0.843019	70.1042
KIF22	ENSG00000079616	0.000136356	0.549641	55.8581
SCGN	ENSG00000079689	0.00112705	0.812817	83.8022
LRRC16A	ENSG00000079691	4.26842e-05	0.400436	71.4836
PGM1	ENSG00000079739	0.00555256	0.913302	47.2743
DDX1	ENSG00000079785	9.8928e-06	0.312122	6.99958
DNM2	ENSG00000079805	0.00392403	0.897938	5.4575
EPB41L2	ENSG00000079819	5.04632e-05	0.417039	30.3054
RIMS1	ENSG00000079841	0.000336949	0.681755	11.6258
MOXD1	ENSG00000079931	0.000373219	0.695241	NA
STX7	ENSG00000079950	0.000261939	0.647083	33.5221
RABL2B	ENSG00000079974	0.000881948	0.791668	72.9534
KEAP1	ENSG00000079999	0.00013999	0.553172	13.3847
DDX43	ENSG00000080007	0.000208449	0.614703	31.8475
PTPRH	ENSG00000080031	0.000757198	0.777131	98.0302
DCT	ENSG00000080166	0.000842645	0.787236	19.6133
SLC35C2	ENSG00000080189	0.000215533	0.619436	34.8533
CRYBG3	ENSG00000080200	0.000188374	0.5984	NA
EPHA6	ENSG00000080224	0.00226858	0.865294	50.9126
SCTR	ENSG00000080293	0.000150386	0.564629	91.38
RFX3	ENSG00000080298	0.000211093	0.616694	6.12011
RIF1	ENSG00000080345	7.72222e-05	0.470531	6.99355
RAB21	ENSG00000080371	2.22229e-05	0.347846	59.2314
SLC4A4	ENSG00000080493	0.00472149	0.906502	11.415
SMARCA2	ENSG00000080503	0.000366673	0.692987	1.12644
RDH8	ENSG00000080511	0.0992559	0.977799	74.3389
SESN1	ENSG00000080546	0.000340162	0.68307	8.21035
MID2	ENSG00000080561	3.51844e-05	0.381466	NA
PIH1D3	ENSG00000080572	0	0	34.6154
COL5A3	ENSG00000080573	4.45673e-05	0.404605	93.4642
SRCAP	ENSG00000080603	0.00104645	0.806694	0.120475
KIAA0020	ENSG00000080608	0.000822662	0.785057	98.5242
CPB2	ENSG00000080618	0.000127621	0.540137	35.8653
CHRNA3	ENSG00000080644	0.000167724	0.581421	39.7145
KCNN2	ENSG00000080709	2.60079e-05	0.357875	4.23468
CNOT4	ENSG00000080802	1.54593e-05	0.32726	15.0413
PSEN1	ENSG00000080815	2.0113e-05	0.34146	30.7873
CPOX	ENSG00000080819	3.64994e-05	0.384734	70.556
CLDND1	ENSG00000080822	0.000235769	0.632208	48.5453
MOK	ENSG00000080823	0.111364	0.979753	NA
HSP90AA1	ENSG00000080824	3.58622e-05	0.383457	2.94561
RBL1	ENSG00000080839	0.297263	0.991586	10.1319
DLGAP4	ENSG00000080845	4.74402e-05	0.410804	34.9437
IGSF9B	ENSG00000080854	0.00340405	0.890387	1.95771
CFHR2	ENSG00000080910	0.00465188	0.905826	80.7722
NDC80	ENSG00000080986	0.000243607	0.636828	17.2821
AP4E1	ENSG00000081014	0.000149849	0.564216	24.6853
RSBN1	ENSG00000081019	0.000823113	0.785132	6.81284
MAGI3	ENSG00000081026	0.000330595	0.679201	NA
CXCL2	ENSG00000081041	0.0145941	0.943766	63.1588
AFP	ENSG00000081051	0.000886627	0.792081	56.9664
COL4A4	ENSG00000081052	3.46785e-05	0.380414	4.46359
TCF7	ENSG00000081059	0.000884686	0.791931	64.201
OSTM1	ENSG00000081087	0.00101349	0.804102	42.0035
CDH7	ENSG00000081138	3.52233e-05	0.381616	4.40937
IMPG2	ENSG00000081148	8.96934e-05	0.490064	6.64418
PCNP	ENSG00000081154	0	0	50.6355
EXD2	ENSG00000081177	0.00014276	0.556628	22.4806
ARG2	ENSG00000081181	0.00117967	0.817137	69.7307
MEF2C	ENSG00000081189	0.00579581	0.914654	NA
PTPRC	ENSG00000081237	0.000106841	0.514406	12.2703
CACNA1S	ENSG00000081248	0.000387874	0.700312	76.0918
PKP1	ENSG00000081277	1.72084e-05	0.332858	50.9849
UBA5	ENSG00000081307	0.000138248	0.551632	24.6672
STK17B	ENSG00000081320	2.36945e-05	0.351565	28.3477
CDC14B	ENSG00000081377	0.000728018	0.773337	54.0751
ZNF510	ENSG00000081386	0.00260242	0.874084	91.8619
LRP2	ENSG00000081479	0.000158998	0.573344	49.9789
ZNF506	ENSG00000081665	0.00442336	0.903385	35.8653
JMJD4	ENSG00000081692	0.000465204	0.722324	93.2655
DUSP12	ENSG00000081721	0.000108807	0.516697	51.4427
AACS	ENSG00000081760	0.000154566	0.568423	88.3381
KIAA0141	ENSG00000081791	0.00208624	0.85996	79.6699
SLC13A1	ENSG00000081800	0.00240317	0.868562	91.9463
CADPS2	ENSG00000081803	7.48118e-05	0.466061	5.17439
PCDHB4	ENSG00000081818	0.00256061	0.872882	91.1933
PCDHA6	ENSG00000081842	2.4291e-05	0.353368	28.2031
PCDHGA2	ENSG00000081853	4.1225e-05	0.396867	82.0794
HSPB11	ENSG00000081870	2.38168e-05	0.351865	76.3629
PHLPP1	ENSG00000081913	4.80643e-05	0.411968	6.74658
ATP8B1	ENSG00000081923	3.86375e-05	0.389993	69.1404
IL12RB2	ENSG00000081985	0.000162024	0.576162	75.4171
SMARCD3	ENSG00000082014	2.8706e-05	0.3649	14.3666
WDR70	ENSG00000082068	0.142906	0.983021	9.34883
FYB	ENSG00000082074	3.34252e-05	0.377409	65.5442
MPP4	ENSG00000082126	0.000431692	0.713009	NA
STRADB	ENSG00000082146	1.53849e-05	0.32696	41.3469
BZW1	ENSG00000082153	7.68991e-05	0.470118	32.3535
PGR	ENSG00000082175	1.29915e-05	0.320424	69.6585
C1QTNF3	ENSG00000082196	0.0324293	0.959844	24.613
ME2	ENSG00000082212	0.00053303	0.739041	NA
C5orf22	ENSG00000082213	0.000211318	0.616844	36.8652
CCNT2	ENSG00000082258	3.14414e-05	0.371661	4.52985
FAM135A	ENSG00000082269	0.000389128	0.700687	6.15626
COL19A1	ENSG00000082293	0.000133301	0.54626	71.2427
EPB41L3	ENSG00000082397	0.000101402	0.506893	50.5391
COBLL1	ENSG00000082438	0.0207951	0.951279	17.6435
DLG3	ENSG00000082458	2.3303e-05	0.350663	5.17751
KCNK2	ENSG00000082482	0.000255596	0.643627	16.1195
SERTAD4	ENSG00000082497	1.81343e-05	0.335449	69.2729
TRAF5	ENSG00000082512	0.00121494	0.819654	58.6892
MRPL22	ENSG00000082515	0.000673818	0.764584	NA
GEMIN5	ENSG00000082516	9.1632e-05	0.493182	76.0376
OPRK1	ENSG00000082556	0.000283631	0.657977	25.9804
NFE2L1	ENSG00000082641	0.000345072	0.684948	7.37305
SEMA5B	ENSG00000082684	0.000242805	0.636528	48.2862
GSK3B	ENSG00000082701	0.000126895	0.539236	23.354
ITGB5	ENSG00000082781	5.0612e-05	0.417265	81.2662
ERC1	ENSG00000082805	0.000110265	0.519026	13.1137
XPO1	ENSG00000082898	0	0	6.33094
C4orf6	ENSG00000082929	0.310809	0.992074	86.4346
RNF13	ENSG00000082996	7.34531e-05	0.463318	24.2877
TRPM3	ENSG00000083067	9.26518e-05	0.494948	9.33679
PALB2	ENSG00000083093	0.000397414	0.703129	17.3604
DOPEY1	ENSG00000083097	0.000118284	0.528981	0.849346
LYRM2	ENSG00000083099	4.10956e-05	0.396454	62.695
BCKDHB	ENSG00000083123	0.000205353	0.612787	24.9744
KAT6A	ENSG00000083168	0.000298888	0.666016	1.58424
ZCCHC6	ENSG00000083223	3.90037e-05	0.390857	14.1498
ULK2	ENSG00000083290	6.91671e-05	0.455806	16.1797
GRHL2	ENSG00000083307	1.16923e-05	0.316254	9.04765
TNPO1	ENSG00000083312	2.61818e-06	0.29518	7.35498
PLOD1	ENSG00000083444	0.000340309	0.683182	60.9783
P2RX5	ENSG00000083454	0.60321	0.997183	64.0022
ITGAE	ENSG00000083457	0.000105971	0.513204	80.2903
DIS3	ENSG00000083520	0.00051176	0.734383	63.9359
PIBF1	ENSG00000083535	0.000240844	0.635476	16.487
TDRD3	ENSG00000083544	0.00024594	0.638594	16.1918
AC000111.6	ENSG00000083622	0	0	NA
NUFIP1	ENSG00000083635	0.218538	0.98813	75.9412
PDS5B	ENSG00000083642	0.00267968	0.875963	1.5481
OXCT1	ENSG00000083720	0.000110814	0.51959	21.9264
RRAGB	ENSG00000083750	0.000162953	0.577026	12.426
EPYC	ENSG00000083782	0.0153441	0.945231	74.4353
CYLD	ENSG00000083799	2.84305e-05	0.364224	4.79489
SLC27A5	ENSG00000083807	0.00045194	0.718869	77.0315
ZNF324	ENSG00000083812	0.000401879	0.704331	70.6704
ZNF671	ENSG00000083814	0.000484955	0.728072	21.7999
ZNF416	ENSG00000083817	0.00060197	0.752564	26.7032
ZNF586	ENSG00000083828	0.163764	0.984862	31.6126
ZNF446	ENSG00000083838	0.0017209	0.846399	95.3979
NA	ENSG00000083842	2.61285e-05	0.358026	NA
ZNF264	ENSG00000083844	0.000189299	0.599489	31.6668
RPS5	ENSG00000083845	0	0	34.7509
FAT1	ENSG00000083857	2.87891e-05	0.365088	99.4639
YTHDC1	ENSG00000083896	4.67349e-06	0.298787	13.204
CHMP2B	ENSG00000083937	0.000261465	0.646783	52.786
SMAP2	ENSG00000084070	0.000256402	0.644003	28.7392
PPIE	ENSG00000084072	0.000506682	0.732993	55.4786
ZMPSTE24	ENSG00000084073	0.000547774	0.742158	10.9632
STARD7	ENSG00000084090	4.47522e-05	0.405094	53.1594
NOA1	ENSG00000084092	0.000111407	0.520266	57.4724
REST	ENSG00000084093	0.000317683	0.674054	82.0914
HAL	ENSG00000084110	0.000260684	0.646219	95.5545
SSH1	ENSG00000084112	0.000282241	0.657188	40.0217
GSTP1	ENSG00000084207	3.75323e-05	0.387551	71.068
APLP2	ENSG00000084234	2.83504e-05	0.363811	39.4133
KIAA1467	ENSG00000084444	4.46028e-05	0.404681	17.1315
SLCO1A2	ENSG00000084453	0.000695087	0.768566	74.5076
WBP11	ENSG00000084463	1.22408e-05	0.317794	19.9988
EIF3I	ENSG00000084623	0.0004056	0.705496	22.3842
NKAIN1	ENSG00000084628	6.17787e-05	0.441418	72.6041
COL16A1	ENSG00000084636	0.00118732	0.818076	96.0725
TXLNA	ENSG00000084652	2.80118e-05	0.362834	41.1662
APOB	ENSG00000084674	0.000140322	0.553586	68.6344
NCOA1	ENSG00000084676	3.91459e-05	0.391345	0.825251
AGBL5	ENSG00000084693	0.000207106	0.613989	13.5052
EFR3B	ENSG00000084710	8.36252e-05	0.480861	NA
KIF3C	ENSG00000084731	1.33954e-05	0.321325	16.0532
RAB10	ENSG00000084733	0	0	42.2384
GCKR	ENSG00000084734	0.0024168	0.868938	85.79
HADHA	ENSG00000084754	0.000160757	0.574997	10.0837
MAPRE3	ENSG00000084764	5.28784e-06	0.300177	NA
CAD	ENSG00000084774	0.000118832	0.529732	0.156617
CD59	ENSG00000085063	0.000169373	0.583149	45.431
CD82	ENSG00000085117	5.64829e-05	0.430224	74.0739
BCORL1	ENSG00000085185	8.25728e-05	0.479171	8.87574
ATRX	ENSG00000085224	0.000104445	0.511326	4.73373
TAF9	ENSG00000085231	0.0024117	0.868788	23.3781
FCN1	ENSG00000085265	0.000577771	0.748695	78.2061
MYNN	ENSG00000085274	0.000203832	0.611622	NA
MECOM	ENSG00000085276	5.2967e-05	0.422862	NA
SCAMP1	ENSG00000085365	0.553459	0.996469	NA
PREP	ENSG00000085377	5.16666e-05	0.419669	8.39708
HACE1	ENSG00000085382	4.60212e-05	0.407611	4.5178
SEH1L	ENSG00000085415	8.59672e-05	0.484129	17.9869
WDR47	ENSG00000085433	6.3965e-05	0.445626	4.15035
WDFY1	ENSG00000085449	3.06375e-05	0.369483	34.9015
OVGP1	ENSG00000085465	0.000238846	0.634086	91.6812
SLC25A24	ENSG00000085491	0.000482518	0.727133	49.3404
MAP3K4	ENSG00000085511	0.136296	0.98227	NA
PILRA	ENSG00000085514	0.000762717	0.77792	60.3879
IGSF9	ENSG00000085552	0.00014289	0.556741	9.71628
ABCB1	ENSG00000085563	3.14351e-05	0.371624	22.7938
ZNF213	ENSG00000085644	0.00175236	0.847639	12.0354
AKR1B1	ENSG00000085662	0.000105273	0.512565	24.9383
CPNE3	ENSG00000085719	0.00034372	0.684497	58.0688
RRN3	ENSG00000085721	0.000147309	0.561549	81.9168
CTTN	ENSG00000085733	0.000154353	0.568236	17.1315
WNT11	ENSG00000085741	1.03311e-05	0.313174	43.3347
MTIF2	ENSG00000085760	0.000123079	0.534616	NA
DDHD2	ENSG00000085788	0.00157238	0.8396	20.1012
TTC39A	ENSG00000085831	0.000451958	0.718944	24.1973
EPS15	ENSG00000085832	0.00787827	0.926299	43.1119
ORC1	ENSG00000085840	0.000882678	0.791743	13.6919
MGST2	ENSG00000085871	0.000528853	0.737876	NA
CHERP	ENSG00000085872	0.000236909	0.633109	6.89717
ATG16L1	ENSG00000085978	9.18724e-06	0.310244	27.1972
USP40	ENSG00000085982	0.000990604	0.802074	92.5607
POMGNT1	ENSG00000085998	0.000576676	0.748319	17.6134
RAD54L	ENSG00000085999	0.00317878	0.886631	20.6373
MAST2	ENSG00000086015	0.00016108	0.575185	NA
DNAJA1	ENSG00000086061	9.81841e-05	0.502723	13.8787
B4GALT1	ENSG00000086062	4.2183e-05	0.398745	33.4076
CHMP5	ENSG00000086065	5.10286e-05	0.418354	22.4505
NFX1	ENSG00000086102	9.41936e-05	0.497051	32.1065
AQP6	ENSG00000086159	0.00245937	0.870065	92.886
DIMT1	ENSG00000086189	0.000190227	0.600391	33.4498
IPO11	ENSG00000086200	4.66505e-05	0.409	6.65623
FOLH1	ENSG00000086205	3.27085e-05	0.374854	69.9777
EIF2AK1	ENSG00000086232	5.28643e-05	0.422486	24.5708
NME8	ENSG00000086288	0.000377251	0.696555	80.1879
EPDR1	ENSG00000086289	0.0222648	0.952594	80.8987
SNX10	ENSG00000086300	0.000540643	0.740693	36.7388
SEPHS1	ENSG00000086475	0	0	14.7642
MRPL28	ENSG00000086504	0.00142414	0.832764	NA
HBQ1	ENSG00000086506	0.00243424	0.869539	NA
ITPKC	ENSG00000086544	0.000303167	0.667819	68.8091
CEACAM6	ENSG00000086548	0.000112935	0.522783	80.718
FAT2	ENSG00000086570	3.32689e-05	0.377146	94.8798
RBM22	ENSG00000086589	0.00240123	0.868487	21.7818
TMED2	ENSG00000086598	1.46504e-05	0.324781	42.5998
ERO1LB	ENSG00000086619	5.15232e-05	0.419368	76.7303
ZFAND6	ENSG00000086666	9.60521e-05	0.499681	66.7972
HSD17B2	ENSG00000086696	0.00241918	0.868976	62.9721
TXLNG	ENSG00000086712	0.0028119	0.878517	55.6213
PPEF1	ENSG00000086717	2.90611e-05	0.365764	10.503
LAT2	ENSG00000086730	0.000870556	0.790541	60.0506
HUWE1	ENSG00000086758	0.00101972	0.804515	0.147929
ZW10	ENSG00000086827	0.000113062	0.522971	40.6421
ALG9	ENSG00000086848	5.67852e-05	0.430976	67.3514
MYBPC2	ENSG00000086967	0.0011662	0.816198	NA
NOX4	ENSG00000086991	9.58724e-05	0.499493	15.6135
ACOX3	ENSG00000087008	0.000932712	0.796364	67.1586
MTMR2	ENSG00000087053	0.000316613	0.673604	NA
PPP1R15A	ENSG00000087074	0.0840797	0.975546	96.452
HSD17B14	ENSG00000087076	0.0124587	0.939484	89.4464
TRIP6	ENSG00000087077	0.00103077	0.805492	77.4291
ACHE	ENSG00000087085	0.000303783	0.668119	21.5409
FTL	ENSG00000087086	0.000304677	0.668607	25.4804
SRRT	ENSG00000087087	2.65521e-05	0.359077	2.54804
BAX	ENSG00000087088	0.00116625	0.816273	40.7927
NLK	ENSG00000087095	0	0	21.1614
PIGS	ENSG00000087111	0.000407313	0.706022	28.7694
ADAMTS2	ENSG00000087116	4.33743e-05	0.401901	91.1029
TMPRSS11E	ENSG00000087128	0.00018859	0.598663	37.7327
ATXN7L3	ENSG00000087152	0.000670146	0.764021	18.0772
PGS1	ENSG00000087157	0.00417809	0.901056	10.915
PSMC5	ENSG00000087191	1.6651e-05	0.331017	23.0468
UIMC1	ENSG00000087206	0.000101694	0.507419	54.1654
CETP	ENSG00000087237	0.000168681	0.581947	56.4544
MMP2	ENSG00000087245	1.40834e-05	0.323504	NA
MT3	ENSG00000087250	0.000829359	0.785846	NA
LPCAT2	ENSG00000087253	0.000110861	0.519702	49.4067
GNAO1	ENSG00000087258	0	0	20.0952
OGFOD1	ENSG00000087263	0.000391671	0.701514	74.6582
SH3BP2	ENSG00000087266	0.00016255	0.576725	74.9413
NOP14	ENSG00000087269	0.000187025	0.597611	85.5792
ADD1	ENSG00000087274	0.000501165	0.73134	31.1427
L2HGDH	ENSG00000087299	5.66366e-05	0.430713	28.2272
TXNDC16	ENSG00000087301	0.000160864	0.575072	72.0378
C14orf166	ENSG00000087302	0.000261671	0.646933	54.3461
NID2	ENSG00000087303	0.000105171	0.512377	97.464
GMCL1	ENSG00000087338	0.00048451	0.727884	34.4618
SF3B2	ENSG00000087365	0.000397836	0.703317	6.2948
KLHL42	ENSG00000087448	6.44279e-05	0.446527	NA
GNAS	ENSG00000087460	0.000311672	0.671913	43.8468
DNM1L	ENSG00000087470	0.000132811	0.545659	18.6676
PTHLH	ENSG00000087494	0.314243	0.992187	49.3826
PHACTR3	ENSG00000087495	5.19581e-05	0.420533	63.448
ERGIC2	ENSG00000087502	8.30313e-05	0.479772	18.0411
TFAP2C	ENSG00000087510	1.96988e-05	0.340183	28.7633
AURKA	ENSG00000087586	4.30517e-05	0.401225	59.0567
CASS4	ENSG00000087589	2.80997e-05	0.363134	84.6937
PIR	ENSG00000087842	0.000337013	0.681793	83.432
AAMDC	ENSG00000087884	0.235491	0.989106	NA
RFX2	ENSG00000087903	9.98029e-06	0.312235	32.1728
NA	ENSG00000087916	0.000203354	0.611247	NA
METTL2A	ENSG00000087995	0.000716673	0.771534	NA
SULT2B1	ENSG00000088002	1.97518e-05	0.340446	77.911
ALG6	ENSG00000088035	0.000170375	0.583637	65.1286
CNOT3	ENSG00000088038	8.78196e-05	0.486759	20.547
GP6	ENSG00000088053	0.00511109	0.909958	91.9161
PTPN4	ENSG00000088179	0.264058	0.990609	17.2158
DDX18	ENSG00000088205	4.43791e-05	0.404267	82.1095
KHSRP	ENSG00000088247	0.000236706	0.632997	9.11993
GNA11	ENSG00000088256	3.99345e-06	0.297472	14.0293
ASAP3	ENSG00000088280	0.00029366	0.663123	83.1637
EDEM2	ENSG00000088298	0.000280709	0.656362	48.0513
DNMT3B	ENSG00000088305	1.62376e-05	0.329815	23.6974
REM1	ENSG00000088320	0.000375799	0.696217	92.4041
TPX2	ENSG00000088325	4.46148e-05	0.404718	9.25848
FER1L4	ENSG00000088340	0	0	NA
PDRG1	ENSG00000088356	0.00871145	0.929154	51.1295
EPB41L1	ENSG00000088367	0.00022873	0.627925	5.82495
SLC15A1	ENSG00000088386	0.000252573	0.642125	65.9057
DOCK9	ENSG00000088387	1.35176e-05	0.321776	2.36733
ANKRD10	ENSG00000088448	0.000161564	0.575598	26.4442
TGDS	ENSG00000088451	0.000460483	0.721198	33.4498
DOCK3	ENSG00000088538	8.12547e-05	0.477292	0.578278
C3orf18	ENSG00000088543	0.000231428	0.629616	55.087
COQ9	ENSG00000088682	0.0171086	0.947147	78.2724
TMEM40	ENSG00000088726	0.000182336	0.594155	53.1594
KIF9	ENSG00000088727	0.00023232	0.630179	79.5554
ARHGAP28	ENSG00000088756	0.000162497	0.57665	19.1434
CRLS1	ENSG00000088766	3.55456e-05	0.382292	51.0391
DEFB127	ENSG00000088782	5.54061e-05	0.428196	77.8447
PPP1R13B	ENSG00000088808	9.47079e-05	0.49784	1.92157
ATRN	ENSG00000088812	0.000345959	0.685474	7.24053
SMOX	ENSG00000088826	2.83935e-05	0.364036	8.5778
SIGLEC1	ENSG00000088827	0.00193867	0.854476	56.8821
FKBP1A	ENSG00000088832	0	0	66.5502
NSFL1C	ENSG00000088833	0.000153879	0.568048	56.9303
SLC4A11	ENSG00000088836	7.94623e-05	0.47425	6.55985
C20orf194	ENSG00000088854	7.91482e-05	0.473461	9.92711
ZNF343	ENSG00000088876	0.0321529	0.959543	87.049
EBF4	ENSG00000088881	8.68493e-05	0.485181	NA
CPXM1	ENSG00000088882	0.000441197	0.715713	51.8583
MAVS	ENSG00000088888	0.000675944	0.76496	NA
LZTS3;	ENSG00000088899	3.7954e-05	0.388302	NA
F11	ENSG00000088926	0.00214524	0.861726	12.7281
XRN2	ENSG00000088930	4.83067e-05	0.412569	16.0713
KIZ	ENSG00000088970	0	0	NA
DYNLL1	ENSG00000088986	7.85921e-05	0.47271	55.334
TESC	ENSG00000088992	0.00290206	0.880884	41.5999
SNX5	ENSG00000089006	6.40559e-05	0.445701	22.8842
RPL6	ENSG00000089009	0	0	51.6897
SIRPG	ENSG00000089012	0.000359715	0.69062	95.4762
MAPKAPK5	ENSG00000089022	0.000117225	0.527666	NA
P2RX7	ENSG00000089041	0.00100836	0.803726	96.699
ESF1	ENSG00000089048	0.000920619	0.79565	13.0474
RBBP9	ENSG00000089050	9.24979e-05	0.494685	56.5689
ANAPC5	ENSG00000089053	0.000196968	0.606251	14.9991
SLC23A2	ENSG00000089057	2.81249e-05	0.363247	11.5716
SLC8B1	ENSG00000089060	0.000877539	0.79133	NA
TMEM230	ENSG00000089063	0.00195973	0.855227	63.6227
DZANK1	ENSG00000089091	0.000203803	0.611547	67.3393
KDM2B	ENSG00000089094	0.000845122	0.787611	1.85531
CFAP61	ENSG00000089101	9.67214e-05	0.50047	NA
LHX5	ENSG00000089116	0.000864636	0.78979	37.1544
TASP1	ENSG00000089123	4.40511e-05	0.403366	29.9681
OAS1	ENSG00000089127	0.232331	0.988919	96.2352
GCN1L1	ENSG00000089154	5.41971e-05	0.425454	0.162641
RPLP0	ENSG00000089157	0.000121867	0.532963	27.0405
PXN	ENSG00000089159	0.00137382	0.829909	88.4585
SIRT4	ENSG00000089163	0.000309238	0.671012	53.551
RPH3A	ENSG00000089169	4.87237e-05	0.413471	61.8216
KIF16B	ENSG00000089177	0.000642144	0.759889	95.8195
TRMT6	ENSG00000089195	0.000119877	0.530559	6.41528
CHGB	ENSG00000089199	0.000103831	0.510499	82.5312
PEBP1	ENSG00000089220	0.00108356	0.809812	63.0805
TBX5	ENSG00000089225	4.95263e-06	0.2995	64.4299
BRAP	ENSG00000089234	0.00142373	0.832726	12.6137
ERP29	ENSG00000089248	0.00155566	0.838586	61.918
NOS1	ENSG00000089250	0.00013835	0.55182	10.5717
FUS	ENSG00000089280	2.98746e-05	0.368018	11.4391
IGBP1	ENSG00000089289	0	0	38.6095
FXYD5	ENSG00000089327	2.13856e-05	0.345592	78.9169
ZNF302	ENSG00000089335	0.00186294	0.851846	77.0014
GRAMD1A	ENSG00000089351	0.00111482	0.812028	13.7642
FXYD3	ENSG00000089356	0.000215882	0.619736	80.5735
HEPH	ENSG00000089472	0.00110213	0.811164	10.355
CDIP1	ENSG00000089486	7.15576e-05	0.45975	NA
CMTM1	ENSG00000089505	0.00501078	0.908869	27.5947
KCNH4	ENSG00000089558	1.47936e-05	0.325119	2.87332
GANAB	ENSG00000089597	7.61173e-05	0.468465	49.1537
GMIP	ENSG00000089639	0.0246834	0.954096	65.7491
RBM41	ENSG00000089682	0.000192147	0.602194	31.213
BIRC5	ENSG00000089685	0.00143397	0.833177	79.2302
LAG3	ENSG00000089692	0.000323442	0.676383	88.8681
MLF2	ENSG00000089693	0.00010455	0.511438	NA
OTUB2	ENSG00000089723	0.00019644	0.605837	47.4429
DDX24	ENSG00000089737	0.000375493	0.696142	79.2362
ZBTB25	ENSG00000089775	7.37463e-05	0.463769	48.3284
NECAP1	ENSG00000089818	0.000295756	0.664062	37.9736
ARHGAP4	ENSG00000089820	4.44864e-05	0.404493	76.1834
ANKRD24	ENSG00000089847	5.64569e-05	0.430112	NA
DHX32	ENSG00000089876	0.000275982	0.654521	20.7879
RCOR1	ENSG00000089902	5.67272e-06	0.301191	19.3121
GPATCH2L	ENSG00000089916	0.112997	0.979941	NA
LTBP4	ENSG00000090006	0.177318	0.986064	NA
BLVRB	ENSG00000090013	0.00100355	0.803388	89.1452
SLC9A1	ENSG00000090020	4.59837e-05	0.407498	6.96946
SPTLC1	ENSG00000090054	0.00107045	0.808459	26.384
PAPOLA	ENSG00000090060	8.21645e-05	0.478532	7.2345
CCNK	ENSG00000090061	0.000226077	0.626085	27.0405
PCBP4	ENSG00000090097	0.000709991	0.770595	20.6855
RGS1	ENSG00000090104	5.7856e-05	0.43353	63.0444
YPEL3	ENSG00000090238	0.00179155	0.848954	48.7561
MRPS33	ENSG00000090263	0.00743725	0.924345	NA
NDUFB2	ENSG00000090266	0.0121731	0.938996	60.6831
NUDC	ENSG00000090273	0.000133846	0.546749	36.0219
MAEA	ENSG00000090316	0.000171247	0.584426	NA
ICAM1	ENSG00000090339	0.00023699	0.633147	91.4463
STRN4	ENSG00000090372	0.000240771	0.635438	5.69243
IRAK3	ENSG00000090376	0.00159674	0.840652	96.1267
LYZ	ENSG00000090382	0.000808364	0.783479	71.6222
SI	ENSG00000090402	0.000122899	0.534315	9.80664
MUL1	ENSG00000090432	0.000527983	0.737688	NA
TFAP4	ENSG00000090447	0	0	33.4498
PDCD7	ENSG00000090470	0.00105115	0.80707	38.829
SPG21	ENSG00000090487	0.000221399	0.623155	20.5229
FETUB	ENSG00000090512	0.00315297	0.88603	89.2356
DNAJB11	ENSG00000090520	0.000174766	0.587619	63.9178
LEPREL1	ENSG00000090530	8.86644e-05	0.488261	45.6719
THPO	ENSG00000090534	0.000382615	0.698584	17.9869
CHRD	ENSG00000090539	0.00015141	0.565418	49.1537
FLT3LG	ENSG00000090554	4.24186e-05	0.39976	55.0268
RAB11FIP3	ENSG00000090565	8.37297e-06	0.308215	35.0762
GNPTG	ENSG00000090581	0.000450719	0.718493	37.6423
ZNF268	ENSG00000090612	0.00144647	0.833628	NA
GOLGA3	ENSG00000090615	0.00015546	0.569513	50.4729
PABPC4	ENSG00000090621	0.00106881	0.808309	2.99982
CD209	ENSG00000090659	0.00113367	0.81338	69.9777
CERS4	ENSG00000090661	0.000247115	0.639345	39.7747
MCOLN1	ENSG00000090674	0.000533607	0.739266	NA
USP48	ENSG00000090686	0.104627	0.978663	22.3962
EFNB1	ENSG00000090776	0	0	35.355
PDPR	ENSG00000090857	0.000430024	0.712595	98.4639
AARS	ENSG00000090861	0.000207016	0.613951	3.62026
GLG1	ENSG00000090863	0.00019788	0.607077	2.49985
KIF4A	ENSG00000090889	0.000185804	0.596709	25.8876
TNRC6A	ENSG00000090905	1.81452e-05	0.335487	16.8303
NA	ENSG00000090920	0.00014191	0.555652	NA
PLEKHG2	ENSG00000090924	0.000867496	0.790203	98.3917
DLL3	ENSG00000090932	0.00022417	0.624657	NA
NAT14	ENSG00000090971	0.00156013	0.839112	NA
PITPNM2	ENSG00000090975	0.000159307	0.573607	10.9692
EXOC1	ENSG00000090989	0.000216469	0.620262	4.25276
RBM27	ENSG00000091009	0.00048219	0.726982	2.43961
POU4F3	ENSG00000091010	0.000708296	0.770257	24.4865
OSBPL8	ENSG00000091039	9.72352e-05	0.501371	12.8125
DTX2	ENSG00000091073	6.32499e-05	0.444198	73.8148
NLRC4	ENSG00000091106	0.000223195	0.624056	7.68628
PUS7	ENSG00000091127	0.00017581	0.588558	4.42142
LAMB4	ENSG00000091128	0.0025915	0.873709	74.6883
NRCAM	ENSG00000091129	5.83719e-05	0.434356	5.01777
LAMB1	ENSG00000091136	9.94673e-05	0.504414	2.52394
SLC26A4	ENSG00000091137	0.0108086	0.936141	95.2352
SLC26A3	ENSG00000091138	0.000194576	0.604335	26.7394
DLD	ENSG00000091140	3.7058e-05	0.386086	21.2517
WDR7	ENSG00000091157	5.21225e-06	0.300026	0.752967
TXNL1	ENSG00000091164	5.23325e-05	0.421509	28.4923
IL5RA	ENSG00000091181	8.88595e-05	0.488749	45.0816
ABCC6	ENSG00000091262	0.00028309	0.657564	75.6521
CMTM6	ENSG00000091317	0.000851238	0.788137	55.2376
ITGA6	ENSG00000091409	0.000577459	0.74862	9.0356
RAPGEF4	ENSG00000091428	4.92454e-05	0.414335	22.083
PK	ENSG00000091436	7.2414e-05	0.461252	NA
SMPX	ENSG00000091482	0.00316535	0.88633	41.716
FH	ENSG00000091483	0.000977033	0.800834	9.75845
SEL1L3	ENSG00000091490	5.79055e-05	0.433643	14.4449
TF	ENSG00000091513	5.38483e-05	0.424665	54.7316
CDV3	ENSG00000091527	0.000840201	0.786898	63.6227
MYO15A	ENSG00000091536	0.000677589	0.765336	NA
ALKBH5	ENSG00000091542	6.43555e-06	0.302768	12.3366
APOH	ENSG00000091583	0.000319791	0.674693	69.1645
NLRP1	ENSG00000091592	0.000300796	0.666767	95.5786
PITPNM3	ENSG00000091622	1.36374e-05	0.322264	6.49961
SPAG7	ENSG00000091640	5.18396e-05	0.419932	33.5221
ORC6	ENSG00000091651	0.00018562	0.596484	43.389
ZFHX4	ENSG00000091656	0.00053163	0.738665	0.421661
SLC17A6	ENSG00000091664	4.79538e-05	0.411743	11.0957
CPA1	ENSG00000091704	0.000508858	0.733481	72.1523
ZC3HC1	ENSG00000091732	0.000164162	0.578153	47.5995
ESR1	ENSG00000091831	2.59001e-05	0.357387	14.8244
RGS17	ENSG00000091844	3.13181e-05	0.371211	44.0455
ANGPT2	ENSG00000091879	5.61239e-05	0.429661	18.5953
TMEM101	ENSG00000091947	0.00139431	0.830923	28.0586
CD200	ENSG00000091972	4.36279e-05	0.402389	33.4799
CCDC80	ENSG00000091986	0.756527	0.998197	11.4933
CMA1	ENSG00000092009	0.00178302	0.848616	75.7665
PSME1	ENSG00000092010	0.000686811	0.767139	54.9003
PPP2R3C	ENSG00000092020	0.000338906	0.682769	26.0587
HAUS4	ENSG00000092036	0.000281659	0.656925	66.2008
JPH4	ENSG00000092051	0	0	NA
MYH7	ENSG00000092054	9.11135e-05	0.492431	NA
CEBPE	ENSG00000092067	0.00095567	0.79873	27.2333
SLC7A8	ENSG00000092068	9.1411e-05	0.492769	31.8475
OSGEP	ENSG00000092094	0.000143384	0.557492	26.4803
SLC22A17	ENSG00000092096	0.000122518	0.533639	19.2458
RNF31	ENSG00000092098	0.000165925	0.57973	11.168
SCFD1	ENSG00000092108	4.91536e-05	0.414184	39.4735
G2E3	ENSG00000092140	0.0460312	0.966192	29.8175
HECTD1	ENSG00000092148	2.74357e-05	0.361519	0.259021
HNRNPC	ENSG00000092199	0.000115093	0.525187	47.6658
RPGRIP1	ENSG00000092200	0.00164713	0.843094	17.9025
SUPT16H	ENSG00000092201	4.67575e-05	0.409338	7.60798
TOX4	ENSG00000092203	2.67893e-05	0.359716	14.1257
GEMIN2	ENSG00000092208	8.22058e-05	0.47872	30.3596
TGM1	ENSG00000092295	0.000442827	0.716164	80.2422
TINF2	ENSG00000092330	0.0062088	0.917659	50.0934
DAZL	ENSG00000092345	3.63537e-06	0.296796	39.7024
TBL1Y	ENSG00000092377	0.0701285	0.972728	NA
SEMA6A	ENSG00000092421	5.81478e-06	0.301604	4.77682
TRPM7	ENSG00000092439	0.000103385	0.509823	1.2951
TYRO3	ENSG00000092445	5.12541e-05	0.418842	36.8291
WDR76	ENSG00000092470	0.000259455	0.645806	33.004
CAPN3	ENSG00000092529	0.000657249	0.762293	30.3656
SNAP23	ENSG00000092531	3.59763e-05	0.38372	68.5682
TBX15	ENSG00000092607	0.000120665	0.53146	45.19
PHGDH	ENSG00000092621	8.55578e-05	0.483378	20.2156
COL9A3	ENSG00000092758	4.45047e-05	0.40453	98.9519
EZR	ENSG00000092820	2.04531e-05	0.342662	13.1016
MYL6	ENSG00000092841	0.117245	0.980354	NA
AGO1	ENSG00000092847	1.2459e-05	0.318546	NA
TEKT2	ENSG00000092850	0.000439575	0.715037	91.7595
CLSPN	ENSG00000092853	0.000104278	0.510988	88.8501
RFFL	ENSG00000092871	0.000238962	0.634199	52.6354
UNC13D	ENSG00000092929	0.000710647	0.770707	89.7958
[truncated: 24,622 more rows]

## Sheet: Table S3
Gene symbol	Merged gene list	Gene lists	Ensembl Identifier	# Tbr1 peaks	# Tbr1 peaks GREAT binomial p-value	Fraction LoF	Fraction LoF percentile	Icelandic KO status	limma E14.5 log(fold-change)	limma E14.5 p-value
NFIB	probable	pIossifov	ENSG00000147862	14	5.43735e-05	3.31457e-06	0.296007	Normal	1.55362	0.00423294
PBX1	probable	pDeRubeis	ENSG00000185630	12	0.00532022	1.64159e-05	0.330378	Normal	0.863422	0.0272015
NFIA	probable	pIossifov, pDeRubeis, pWillsey	ENSG00000162599	12	4.04565e-05	4.85291e-05	0.41302	Normal	1.26393	0.00908698
ZFHX3	probable	pIossifov	ENSG00000140836	12	0.00612012	0.000126852	0.539198	Normal	-0.439644	0.0892205
MYT1L	probable	pDeRubeis	ENSG00000186487	10	0.00254336	9.86994e-06	0.311972	Normal	0.941037	0.0255789
DSCAM	high-confidence	hcIossifov, pDeRubeis	ENSG00000171587	10	0.000358331	2.50467e-05	0.355396	Normal	0.392676	0.328742
INSC	probable	pDeRubeis	ENSG00000188487	9	0.00331403	0.000321202	0.675482	Normal	-0.0228751	0.864255
ELAVL2	probable	pIossifov	ENSG00000107105	8	0.141648	3.62571e-05	0.384321	Normal	1.85207	0.0370781
PARD3B	probable	pIossifov	ENSG00000116117	8	0.105945	8.94886e-05	0.489651	Normal	0.165286	0.271518
GRIN2B	high-confidence	hcIossifov, hcDeRubeis, hcWillsey	ENSG00000273079	8	0.00724626	0.000121913	0.533113	Normal	0.344418	0.0341276
NBEA	probable	pIossifov	ENSG00000172915	8	0.0515725	0.000266682	0.64975	Normal	0.90763	0.0780612
ZNF238	probable	pDeRubeis	ENSG00000179456	7	0.000499171	0	0	Normal	1.17385	0.0295188
JARID2	probable	pDeRubeis	ENSG00000008083	7	0.0635608	1.40026e-05	0.323279	Normal	0.212642	0.484249
SORCS3	probable	pDeRubeis	ENSG00000156395	7	0.0755411	5.26618e-05	0.422261	Normal	-0.108312	0.485021
CMPK2	probable	pIossifov	ENSG00000134326	7	0.01473	6.17573e-05	0.441343	Normal	-0.108597	0.606334
ANK2	high-confidence	hcIossifov, hcDeRubeis, hcWillsey	ENSG00000145362	7	0.0213136	7.41066e-05	0.46452	Normal	0.967954	0.025799
MED13L	high-confidence	hcIossifov, pDeRubeis, pWillsey	ENSG00000123066	7	0.0864094	7.45316e-05	0.465497	Normal	0.601537	0.0413064
GSDMC	probable	pDeRubeis	ENSG00000147697	7	0.0314388	0.000819871	0.784832	Normal	-0.223907	0.0566827
TBL1XR1	probable	pIossifov	ENSG00000177565	6	0.509279	0	0	Normal	0.354374	0.00664488
CUL1	probable	pDeRubeis	ENSG00000055130	6	0.112612	1.67589e-05	0.331355	Normal	0.728397	0.0634557
RELN	probable	pDeRubeis, pWillsey	ENSG00000189056	6	0.0145771	2.11735e-05	0.344953	Normal	1.18438	0.00807816
TCF4	probable	pDeRubeis	ENSG00000196628	6	0.255793	0.000241709	0.636002	Normal	0.986485	0.00403172
TAF4	probable	pDeRubeis	ENSG00000130699	6	0.0069688	0.00595495	0.915668	Normal	-0.22708	0.0747351
SEMA6A	probable	pDeRubeis	ENSG00000092421	5	0.200549	5.81478e-06	0.301604	Normal	-0.352901	0.259624
BAI1	probable	pIossifov	ENSG00000181790	5	0.0794877	8.33513e-06	0.308103	Normal	0.0751616	0.731505
CACNA2D3	high-confidence	hcDeRubeis, pIossifov, pWillsey	ENSG00000157445	5	0.137469	1.18177e-05	0.316667	Normal	-0.0853816	0.783204
GRIA2	probable	pDeRubeis	ENSG00000120251	5	0.174088	2.02227e-05	0.341798	Normal	1.12023	0.0193269
CTNNB1	probable	pIossifov	ENSG00000168036	5	0.0539255	2.71695e-05	0.360843	Normal	-0.275199	0.470342
LRP6	probable	pIossifov	ENSG00000070018	5	0.000647372	5.2461e-05	0.42181	Normal	0.616293	0.0411466
ZNF462	probable	pDeRubeis	ENSG00000148143	5	0.371028	7.6374e-05	0.468991	Normal	1.06806	0.0262284
NUAK1	probable	pIossifov, pDeRubeis, pWillsey	ENSG00000074590	5	0.0855889	8.09618e-05	0.476804	Normal	0.225989	0.466833
DNAH5	probable	pIossifov, pDeRubeis, pWillsey	ENSG00000039139	5	0.247938	9.37449e-05	0.496262	Normal	-0.170932	0.18787
CUX2	probable	pDeRubeis	ENSG00000111249	5	0.000805091	0.000128206	0.540626	Normal	-0.133799	0.512416
IGSF3	probable	pIossifov	ENSG00000143061	5	0.00222703	0.000158136	0.572217	Normal	-0.0687693	0.797866
NXPE4	probable	pIossifov	ENSG00000137634	5	0.0854276	0.000253519	0.642651	Normal	0.274389	0.116146
NFE2L3	probable	pIossifov	ENSG00000050344	5	0.0846432	0.00314119	0.885767	Normal	0.308325	0.113281
EPHB2	probable	pIossifov, pDeRubeis, pWillsey	ENSG00000133216	5	0.00128843	0.00542798	0.912137	Normal	-0.333188	0.0327622
DPP4	probable	pDeRubeis	ENSG00000197635	5	0.00898849	0.00672607	0.920739	Normal	-0.199186	0.0959993
GALNT18, GALNTL4	probable	pIossifov, pDeRubeis, pWillsey	ENSG00000110328	4	0.277878	6.89068e-06	0.304046	Normal	-0.99998	0.0282131
BCL11A	high-confidence	hcDeRubeis, pIossifov, pWillsey	ENSG00000119866	4	0.435423	1.71297e-05	0.332557	Normal	1.14353	0.0261191
CUL3	high-confidence	hcDeRubeis, hcWillsey, pIossifov	ENSG00000036257	4	0.0709797	1.94001e-05	0.339694	Normal	0.807959	0.00732935
THSD7A	probable	pIossifov, pDeRubeis, pWillsey	ENSG00000005108	4	0.410218	3.17332e-05	0.372413	Normal	-0.1037	0.465671
LRRC4	probable	pDeRubeis	ENSG00000128594	4	0.0847949	3.24026e-05	0.37399	Normal	-0.10753	0.717055
FAM190A	probable	pDeRubeis	ENSG00000184305	4	0.470996	4.08651e-05	0.395928	Normal	0.44712	0.0378901
SETBP1	probable	pIossifov, pDeRubeis, pWillsey	ENSG00000152217	4	0.590047	5.01369e-05	0.416138	Normal	NA	NA
HGF	probable	pDeRubeis	ENSG00000019991	4	0.639806	5.77284e-05	0.433042	Normal	-0.140412	0.168259
WDFY3	high-confidence	hcIossifov, pDeRubeis, pWillsey	ENSG00000163625	4	0.148889	8.82967e-05	0.48766	Normal	0.242166	0.0785885
FAM8A1	probable	pIossifov, pDeRubeis, pWillsey	ENSG00000137414	4	0.00423543	0.000110192	0.518801	Normal	0.681618	0.344721
WNT7B	probable	pIossifov	ENSG00000188064	4	0.0276568	0.000161806	0.575748	Normal	0.764682	0.0340495
CTNNA3	probable	pIossifov	ENSG00000183230	4	0.144417	0.000183871	0.595395	Normal	-0.105618	0.231078
DYSF	probable	pDeRubeis	ENSG00000135636	4	0.132114	0.000191412	0.601593	Normal	-0.241195	0.127914
GRAMD3	probable	pDeRubeis	ENSG00000155324	4	0.402318	0.000413202	0.707411	Normal	-0.238414	0.0619802
BTBD9	probable	pIossifov	ENSG00000183826	4	0.0982421	0.000443267	0.716314	Normal	0.134737	0.448672
CTTNBP2	probable	pIossifov, pDeRubeis, pWillsey	ENSG00000077063	4	0.12932	0.000576797	0.748357	Normal	0.554678	0.205001
TNRC18	probable	pIossifov	ENSG00000182095	4	0.00347524	0.00107189	0.808647	Normal	0.0415175	0.809121
NARG2	probable	pIossifov	ENSG00000128915	4	0.195074	0.00183282	0.850532	Normal	0.083857	0.325975
PDE11A	probable	pDeRubeis	ENSG00000128655	4	0.0233129	0.00208525	0.859885	KO	NA	NA
SCN2A	high-confidence	hcIossifov, hcDeRubeis, hcWillsey	ENSG00000136531	3	0.0145263	9.38946e-06	0.310619	Normal	0.26609	0.210889
NR3C2	probable	pIossifov, pDeRubeis, pWillsey	ENSG00000151623	3	0.839706	1.78427e-05	0.33451	Normal	-0.0326863	0.692526
SVIL	probable	pDeRubeis	ENSG00000197321	3	0.322426	1.99176e-05	0.341009	Normal	-0.226554	0.132963
WAC	high-confidence	hcIossifov	ENSG00000095787	3	0.686914	2.05436e-05	0.343	Normal	0.748058	0.17996
LRFN2	probable	pIossifov	ENSG00000156564	3	0.522853	3.27256e-05	0.37493	Normal	-0.203378	0.488067
FOXP1	high-confidence	hcIossifov, pDeRubeis, pWillsey	ENSG00000114861	3	0.683306	3.57467e-05	0.382856	Normal	0.470754	0.0161674
DYRK1A	high-confidence	hcIossifov, hcDeRubeis, hcWillsey	ENSG00000157540	3	0.15014	3.81743e-05	0.388866	Normal	-0.284837	0.0490199
CSMD2	probable	pIossifov	ENSG00000121904	3	0.0770891	4.08137e-05	0.395552	Normal	0.128671	0.640028
ERBB2IP	probable	pDeRubeis	ENSG00000112851	3	0.073003	4.67366e-05	0.409151	Normal	1.24828	0.0730723
HIVEP3	probable	pIossifov	ENSG00000127124	3	0.122016	4.83347e-05	0.412719	Normal	0.0921016	0.327544
PPP1R15B	probable	pWillsey	ENSG00000158615	3	0.0189502	4.98531e-05	0.415386	Normal	-0.27783	0.0270983
ADAMTS9	probable	pIossifov	ENSG00000163638	3	0.661712	5.46997e-05	0.426543	Normal	-0.431411	0.088196
DSCAML1	probable	pIossifov	ENSG00000177103	3	0.121344	5.57411e-05	0.42891	Normal	-0.113292	0.330319
TUSC1	probable	pIossifov	ENSG00000198680	3	0.924662	6.93836e-05	0.456331	Normal	-0.156383	0.587616
NIN	probable	pIossifov	ENSG00000100503	3	0.0307931	9.08635e-05	0.492018	Normal	0.533993	0.0757974
TRPM3	probable	pIossifov	ENSG00000083067	3	0.74451	9.26518e-05	0.494948	Normal	-0.295793	0.0527543
NRXN1	probable	pIossifov, pDeRubeis, pWillsey	ENSG00000179915	3	0.924662	0.00012073	0.531573	Normal	1.4288	0.00437542
SORBS1	probable	pIossifov	ENSG00000095637	3	0.0611812	0.000147865	0.562075	Normal	0.883257	0.0480639
TTN	probable	pDeRubeis, pDeRubeis	ENSG00000155657	3	0.0668616	0.000171636	0.584952	Normal	-0.0995841	0.449249
CECR2	probable	pDeRubeis	ENSG00000099954	3	0.0300677	0.000295485	0.66395	Normal	0.218522	0.249853
DST	probable	pIossifov, pDeRubeis, pWillsey	ENSG00000151914	3	0.189852	0.000297238	0.665339	Normal	0.0652808	0.41417
RIMS1	high-confidence	hcIossifov, pDeRubeis, pWillsey	ENSG00000079841	3	0.60996	0.000336949	0.681755	Normal	0.168607	0.328818
SUCLG2	probable	pIossifov	ENSG00000172340	3	0.538132	0.000518509	0.73581	Normal	-0.399569	0.3525
TYW5	probable	pIossifov	ENSG00000162971	3	0.0882721	0.00167694	0.844484	Normal	0.0518233	0.648534
KMT2E, MLL5	high-confidence	hcIossifov, pDeRubeis, pWillsey	ENSG00000005483	3	0.452563	0.00928261	0.931483	Normal	0.648666	0.00950393
IRF2BPL	probable	pIossifov	ENSG00000119669	3	0.0223735	0.0274639	0.956726	Normal	-0.0440482	0.747818
SHANK2	probable	pIossifov, pDeRubeis, pWillsey	ENSG00000162105	3	0.279433	0.0898355	0.976485	Normal	0.342039	0.180687
ARMC2	probable	pDeRubeis	ENSG00000118690	3	0.147475	0.319932	0.99245	Normal	-0.171704	0.285766
TBR1	high-confidence	hcIossifov, hcDeRubeis, hcWillsey	ENSG00000136535	2	0.242676	0	0	Normal	1.29152	0.0132075
NCKAP1	high-confidence	hcIossifov, pDeRubeis, pWillsey	ENSG00000061676	2	0.0775931	2.63559e-06	0.295218	Normal	0.93287	0.0632073
ZMYND11	probable	pIossifov, pDeRubeis, pWillsey	ENSG00000015171	2	0.815097	4.27939e-06	0.298148	Normal	0.403965	0.315187
RFX7	probable	pDeRubeis	ENSG00000181827	2	0.129701	7.4936e-06	0.305623	Normal	1.18312	0.0520989
ASXL3	high-confidence	hcDeRubeis	ENSG00000141431	2	0.705591	1.80467e-05	0.335149	Normal	0.698224	0.0118035
MED13	probable	pIossifov	ENSG00000108510	2	0.129003	2.71098e-05	0.360693	Normal	1.45742	0.0545153
LEO1	probable	pDeRubeis	ENSG00000166477	2	0.0650845	2.93013e-05	0.366252	Normal	-0.241984	0.0522654
PRPF40A	probable	pDeRubeis	ENSG00000196504	2	0.25159	3.49868e-05	0.381015	Normal	0.694587	0.00719206
SPATA13	probable	pIossifov, pDeRubeis, pWillsey	ENSG00000182957	2	0.300533	3.79146e-05	0.388227	Normal	-0.186944	0.452698
MPP6	probable	pIossifov	ENSG00000105926	2	0.355906	3.99531e-05	0.39296	Normal	-0.412957	0.263369
TANC2	probable	pIossifov	ENSG00000170921	2	0.40059	4.37373e-05	0.402727	Normal	0.906698	0.0325307
GABRB3	probable	pDeRubeis	ENSG00000166206	2	0.812375	6.01852e-05	0.438188	Normal	0.977502	0.0201713
RIMBP2	probable	pDeRubeis	ENSG00000060709	2	0.181822	7.63399e-05	0.468878	Normal	NA	NA
IQGAP2	probable	pIossifov, pDeRubeis, pWillsey	ENSG00000145703	2	0.352283	8.01164e-05	0.475151	Normal	0.179307	0.290947
CSTF2T	probable	pIossifov, pDeRubeis, pWillsey	ENSG00000177613	2	0.860148	9.02486e-05	0.491116	Normal	-0.0114557	0.975493
PRKAR1B	probable	pDeRubeis	ENSG00000188191	2	0.0658457	0.000107289	0.515007	Normal	0.312246	0.472077
VAV3	probable	pIossifov	ENSG00000134215	2	0.787858	0.000113891	0.523835	Normal	-0.205757	0.207254
CBX4	probable	pIossifov, pDeRubeis, pWillsey	ENSG00000141582	2	0.0928062	0.000192615	0.602532	Normal	0.0957397	0.433116
ATP10D	probable	pIossifov, pDeRubeis, pWillsey	ENSG00000145246	2	0.243916	0.000193662	0.603396	Normal	-0.0353564	0.714184
SPRED2	probable	pDeRubeis	ENSG00000198369	2	0.817367	0.000205357	0.612824	Normal	-0.101832	0.328839
ANKFN1	probable	pIossifov	ENSG00000153930	2	0.49249	0.00020757	0.614177	Normal	NA	NA
XKR6	probable	pIossifov	ENSG00000171044	2	0.219102	0.000211905	0.617107	Normal	0.346223	0.393351
BRCA1	probable	pIossifov	ENSG00000012048	2	0.0256233	0.000250707	0.641073	Normal	-0.217919	0.0690923
ARID1B	high-confidence	hcIossifov, hcDeRubeis, pWillsey	ENSG00000049618	2	0.913656	0.000278519	0.655347	Normal	0.134738	0.525317
PTPN13	probable	pIossifov	ENSG00000163629	2	0.329986	0.000401754	0.704256	Normal	-0.106239	0.414994
DNMT3A	probable	pIossifov	ENSG00000119772	2	0.292886	0.000414985	0.708238	Normal	-0.374636	0.200192
MTUS1	probable	pIossifov	ENSG00000129422	2	0.198896	0.000431842	0.713046	Normal	-0.127337	0.248846
PSD3	probable	pIossifov	ENSG00000156011	2	0.629955	0.000443852	0.716577	Normal	0.453888	0.0387811
RGS2	probable	pDeRubeis	ENSG00000116741	2	0.311497	0.000544223	0.74137	Normal	-0.0437428	0.59742
LRRTM2	probable	pDeRubeis	ENSG00000146006	2	0.294413	0.000578365	0.74877	Normal	0.370144	0.0290018
TRIM37	probable	pDeRubeis	ENSG00000108395	2	0.155547	0.000675231	0.764772	Normal	0.336191	0.0663403
C10orf90	probable	pIossifov	ENSG00000154493	2	0.354265	0.00127225	0.823823	Normal	-0.122589	0.362009
AMBP	probable	pIossifov	ENSG00000106927	2	0.117166	0.00134381	0.828556	Normal	0.0622342	0.742788
EFCAB5	probable	pIossifov, pDeRubeis, pWillsey	ENSG00000176927	2	0.0527675	0.00208831	0.860073	KO	NA	NA
GPRIN1	probable	pIossifov	ENSG00000169258	2	0.0144218	0.111335	0.979715	Normal	-0.12507	0.589808
USP29	probable	pIossifov	ENSG00000131864	2	0.176038	0.404252	0.99414	Normal	NA	NA
3	probable	pIossifov	ENSG00000274391	1	0.364142	NA	NA	Normal	-0.0635625	0.618305
AHDC1	probable	pIossifov	ENSG00000126705	1	0.350102	4.13138e-06	0.297923	Normal	-0.16633	0.108166
ANKRD11	high-confidence	hcIossifov	ENSG00000167522	1	0.453605	5.77446e-06	0.301491	Normal	0.310914	0.051498
GABRB1	probable	pDeRubeis	ENSG00000163288	1	0.76367	6.19019e-06	0.302355	Normal	-0.0057012	0.95493
SMARCC2	probable	pDeRubeis, pWillsey	ENSG00000139613	1	0.20018	7.67997e-06	0.306074	Normal	0.218482	0.283678
TRIP12	probable	pIossifov, pDeRubeis, pWillsey	ENSG00000153827	1	0.336083	1.03112e-05	0.313099	Normal	0.875931	0.032979
WNT9A	probable	pIossifov	ENSG00000143816	1	0.202176	1.05558e-05	0.313812	Normal	-0.961416	0.000723842
FAM59A	probable	pDeRubeis	ENSG00000141441	1	0.808876	1.71002e-05	0.332444	Normal	0.142309	0.108785
PTEN	probable	pDeRubeis	ENSG00000171862	1	0.854798	1.84188e-05	0.336652	Normal	0.452582	0.00514285
SPTBN1	probable	pIossifov	ENSG00000115306	1	0.71608	1.95052e-05	0.33992	Normal	0.523395	0.0178179
ATP1A1	probable	pIossifov	ENSG00000163399	1	0.729803	1.95214e-05	0.339957	Normal	-0.556247	0.0590261
MYO1E	probable	pIossifov	ENSG00000157483	1	0.543598	2.63923e-05	0.358627	Normal	0.0791881	0.542442
HECTD1	probable	pIossifov	ENSG00000092148	1	0.542827	2.74357e-05	0.361519	Normal	0.579759	0.0409091
KAT2B	probable	pIossifov	ENSG00000114166	1	0.337566	2.75435e-05	0.361782	Normal	0.4451	0.40243
KDM6B	high-confidence	hcIossifov, pDeRubeis, pWillsey	ENSG00000132510	1	0.339479	2.83711e-05	0.363886	Normal	-0.673801	0.002131
IL17RA	probable	pIossifov	ENSG00000177663	1	0.376818	2.90941e-05	0.365877	Normal	-0.384639	0.0917757
ILF2	probable	pIossifov, pDeRubeis	ENSG00000143621	1	0.0533351	2.92602e-05	0.366215	Normal	0.0518481	0.767497
SKI	probable	pDeRubeis	ENSG00000157933	1	0.3559	2.93867e-05	0.366778	Normal	-0.212547	0.274439
UBR5	probable	pIossifov	ENSG00000104517	1	0.508541	3.18334e-05	0.372751	Normal	0.195318	0.0677767
EP300	probable	pDeRubeis	ENSG00000100393	1	0.422213	3.32532e-05	0.377108	Normal	0.335538	0.0479696
DOCK8	probable	pDeRubeis	ENSG00000107099	1	0.532474	3.47224e-05	0.380489	Normal	-0.163762	0.0825441
FARP1	probable	pIossifov, pDeRubeis, pWillsey	ENSG00000152767	1	0.736629	3.53136e-05	0.381766	Normal	-0.209908	0.15977
ARHGAP30	probable	pIossifov	ENSG00000186517	1	0.0966502	3.56427e-05	0.382518	Normal	-0.136115	0.313145
AXL	probable	pDeRubeis	ENSG00000167601	1	0.147654	3.71328e-05	0.386499	Normal	-0.583791	0.0525733
MYH10	probable	pIossifov, pDeRubeis, pWillsey	ENSG00000133026	1	0.530475	4.02352e-05	0.393975	Normal	0.345218	0.229398
NEDD9	probable	pIossifov	ENSG00000111859	1	0.633237	4.05359e-05	0.394726	Normal	-0.225164	0.215551
NF1	probable	pIossifov	ENSG00000196712	1	0.501798	4.18877e-05	0.398069	Normal	0.259208	0.0426758
KCNS3	probable	pDeRubeis	ENSG00000170745	1	0.903357	4.25676e-05	0.400135	Normal	0.026452	0.796736
ARHGAP5	probable	pIossifov	ENSG00000100852	1	0.818275	4.463e-05	0.404793	Normal	0.0311861	0.895028
RAPGEF4	probable	pDeRubeis	ENSG00000091428	1	0.687561	4.92454e-05	0.414335	Normal	-0.278931	0.0962668
STXBP5	probable	pDeRubeis	ENSG00000164506	1	0.876552	5.46194e-05	0.42643	Normal	0.116803	0.293303
STAM	probable	pIossifov	ENSG00000136738	1	0.266966	5.47016e-05	0.426581	Normal	0.442183	0.02794
BAZ2B	probable	pIossifov	ENSG00000123636	1	0.596846	5.49669e-05	0.427257	Normal	0.171136	0.271386
TTK	probable	pDeRubeis	ENSG00000112742	1	0.315612	6.07558e-05	0.439428	Normal	0.120397	0.67493
PHF2	high-confidence	hcIossifov, pDeRubeis, pWillsey	ENSG00000197724	1	0.579715	6.31865e-05	0.44401	Normal	-0.135336	0.241077
INTS6	probable	pIossifov	ENSG00000102786	1	0.381833	7.42063e-05	0.464783	Normal	NA	NA
KDM5B	high-confidence	hcIossifov, pDeRubeis	ENSG00000117139	1	0.226011	7.85119e-05	0.472522	Normal	0.391502	0.00864355
SH3D19	probable	pDeRubeis	ENSG00000109686	1	0.318939	7.91263e-05	0.473386	Normal	-0.494746	0.00922805
RASAL1	probable	pDeRubeis	ENSG00000111344	1	0.233909	8.40096e-05	0.4815	Normal	-0.051628	0.681655
CNOT3	probable	pIossifov, pDeRubeis, pWillsey	ENSG00000088038	1	0.0821783	8.78196e-05	0.486759	Normal	-0.0406465	0.788841
CCIN	probable	pDeRubeis	ENSG00000185972	1	0.130728	8.81934e-05	0.487472	Normal	0.0325716	0.710235
OSBPL3	probable	pDeRubeis	ENSG00000070882	1	0.574587	8.96434e-05	0.489914	Normal	-0.268508	0.214197
SPARCL1	probable	pDeRubeis	ENSG00000152583	1	0.286046	9.40474e-05	0.496788	Normal	-0.0555159	0.876246
OSBPL8	probable	pIossifov	ENSG00000091039	1	0.549589	9.72352e-05	0.501371	Normal	1.23648	0.0119814
CPD	probable	pIossifov	ENSG00000108582	1	0.312691	0.00010857	0.516322	Normal	0.511794	0.0383755
ADNP	high-confidence	hcIossifov, hcDeRubeis, pWillsey	ENSG00000101126	1	0.337099	0.000116653	0.526952	Normal	0.345728	0.150674
PCSK2	probable	pIossifov	ENSG00000125851	1	0.893631	0.000123757	0.53548	Normal	-0.155194	0.578902
UNC80	probable	pIossifov, pWillsey	ENSG00000144406	1	0.65614	0.000135931	0.549115	Normal	-0.0102275	0.928338
PDCD1	probable	pIossifov, pWillsey	ENSG00000188389	1	0.94777	0.000138436	0.551933	Normal	-0.129864	0.39378
ZMYM2	probable	pWillsey	ENSG00000121741	1	0.497273	0.000140554	0.554036	Normal	1.0322	0.0648234
AMOTL1	probable	pIossifov	ENSG00000166025	1	0.488595	0.000148328	0.562676	Normal	-0.0593338	0.779
ACACB	probable	pIossifov, pDeRubeis, pWillsey	ENSG00000076555	1	0.329402	0.000150692	0.564742	KO	-0.112016	0.234155
BTRC	probable	pDeRubeis	ENSG00000166167	1	0.594588	0.000162	0.576124	Normal	-0.0967151	0.608921
OLFM3	probable	pIossifov	ENSG00000118733	1	0.990687	0.000166869	0.580632	Normal	-0.0934249	0.322399
TSPAN17	probable	pIossifov, pDeRubeis, pWillsey	ENSG00000048140	1	0.367519	0.000183292	0.594906	Normal	-0.421741	0.156061
ARHGAP44	probable	pDeRubeis	ENSG00000006740	1	0.56273	0.000199218	0.608091	Normal	-0.00588274	0.976646
TRIO	probable	pDeRubeis	ENSG00000038382	1	0.769281	0.000209019	0.615041	Normal	0.528607	0.101147
CCPG1	probable	pIossifov	ENSG00000260916	1	0.202206	0.000215619	0.619511	Normal	0.142322	0.194695
UTP6	probable	pDeRubeis	ENSG00000108651	1	0.678053	0.000273928	0.653244	Normal	0.583642	0.131511
MAD1L1	probable	pDeRubeis	ENSG00000002822	1	0.697779	0.000370118	0.694114	Normal	-0.119574	0.457893
KDM4B	probable	pDeRubeis	ENSG00000127663	1	0.385663	0.000409731	0.706848	Normal	-0.035135	0.867091
STARD10	probable	pIossifov	ENSG00000214530	1	0.0978699	0.000535744	0.739792	Normal	-0.402298	0.216953
C12orf51	probable	pDeRubeis	ENSG00000173064	1	0.238608	0.000542072	0.740881	Normal	0.344889	0.200986
TCF7L2	high-confidence	hcIossifov	ENSG00000148737	1	0.774242	0.000562404	0.745727	Normal	-1.49967	0.126474
RANBP17	probable	pDeRubeis	ENSG00000204764	1	0.652652	0.000623261	0.756358	KO	-0.302228	0.038702
SCAMP2	probable	pIossifov	ENSG00000140497	1	0.078366	0.000664426	0.763345	Normal	-0.232036	0.264911
CCDC171	probable	pIossifov	ENSG00000164989	1	0.94823	0.000736178	0.774877	KO	-0.266943	0.0973233
SRCAP	probable	pIossifov	ENSG00000080603	1	0.239707	0.00104645	0.806694	Normal	0.334301	0.0927253
PHF3	probable	pIossifov	ENSG00000118482	1	0.95531	0.00119429	0.818639	Normal	0.514934	0.0429956
INTS1	probable	pDeRubeis	ENSG00000164880	1	0.121374	0.00119797	0.818902	Normal	-0.0211712	0.908374
C16orf13	probable	pIossifov	ENSG00000130731	1	0.0264353	0.00155576	0.838624	Normal	-0.243282	0.283213
MYOC	probable	pDeRubeis	ENSG00000034971	1	0.216862	0.00241162	0.86875	Normal	0.0502172	0.630212
JAKMIP1	probable	pIossifov	ENSG00000152969	1	0.501384	0.00436875	0.902859	Normal	0.472738	0.537531
KMT2C, MLL3	high-confidence	hcDeRubeis, pIossifov, pWillsey	ENSG00000055609	1	0.560495	0.00629359	0.91811	Normal	0.743287	0.0202086
WDR27	probable	pDeRubeis	ENSG00000184465	1	0.509543	0.00705559	0.922542	KO	-0.00717469	0.951892
KIF21A	probable	pIossifov	ENSG00000139116	1	0.765386	0.0188701	0.949363	Normal	0.652785	0.148433
LTN1	probable	pIossifov, pWillsey	ENSG00000198862	1	0.237672	0.080374	0.974945	KO	0.27398	0.314017
GGNBP2	probable	pDeRubeis	ENSG00000278311	0	1	NA	NA	Normal	0.714955	0.0491961
LYPD4	probable	pDeRubeis	ENSG00000273111	0	1	NA	NA	Normal	0.23261	0.132116
PPPDE1	probable	pDeRubeis	ENSG00000268723	0	1	NA	NA	Normal	0.43212	0.0631538
CASP8AP2	probable	pIossifov	ENSG00000118412	0	1	0	0	Normal	1.23989	0.0329619
MAP3K14	probable	pIossifov, pDeRubeis, pWillsey	ENSG00000006062	0	1	0	0	Normal	-0.22827	0.0819568
MFRP	probable	pIossifov, pWillsey	ENSG00000259159	0	1	0	0	Normal	-0.213753	0.345761
RPS6KA3	probable	pIossifov, pDeRubeis, pWillsey	ENSG00000177189	0	1	0	0	Normal	0.788024	0.13695
SLC38A3	probable	pIossifov	ENSG00000188338	0	1	0	0	Normal	-0.246463	0.293145
L1CAM	probable	pIossifov, pDeRubeis, pWillsey	ENSG00000198910	0	1	1.2238e-06	0.294016	Normal	0.345939	0.458313
NMT1	probable	pIossifov	ENSG00000136448	0	1	2.42718e-06	0.29488	Normal	-0.249418	0.175079
YTHDC1	probable	pIossifov	ENSG00000083896	0	1	4.67349e-06	0.298787	Normal	0.384575	0.312339
NOTCH1	probable	pIossifov	ENSG00000148400	0	1	4.82803e-06	0.299162	Normal	0.0974081	0.432709
MBD5	probable	pIossifov, pDeRubeis, pWillsey	ENSG00000204406	0	1	5.34407e-06	0.300402	Normal	0.503215	0.0618723
POGZ	high-confidence	hcIossifov, hcDeRubeis, hcWillsey	ENSG00000143442	0	1	8.26623e-06	0.307877	Normal	-0.188903	0.0776209
ZC3H11A	probable	pDeRubeis	ENSG00000058673	0	1	8.52309e-06	0.308591	Normal	0.540468	0.0133642
ATP1B1	probable	pIossifov, pDeRubeis, pWillsey	ENSG00000143153	0	1	8.87364e-06	0.309342	Normal	-0.179236	0.527643
UBAP2L	probable	pIossifov	ENSG00000143569	0	1	9.15226e-06	0.310169	Normal	-0.120449	0.319774
BTAF1	probable	pIossifov	ENSG00000095564	0	1	9.88632e-06	0.312009	Normal	0.500679	0.307257
PHF21A	probable	pIossifov	ENSG00000135365	0	1	1.11198e-05	0.314939	Normal	0.624711	0.0726374
APBB1	probable	pIossifov	ENSG00000166313	0	1	1.22628e-05	0.317907	Normal	-0.0873033	0.769817
CHD1	probable	pIossifov	ENSG00000153922	0	1	1.37577e-05	0.322602	Normal	0.491272	0.109186
PLEKHO1	probable	pIossifov	ENSG00000023902	0	1	1.52399e-05	0.326472	Normal	-0.197928	0.355846
DIP2A	high-confidence	hcIossifov, pDeRubeis, pWillsey	ENSG00000160305	0	1	1.65173e-05	0.330641	Normal	-0.382731	0.0307494
RAB2A	probable	pIossifov, pDeRubeis, pWillsey	ENSG00000104388	0	1	1.71169e-05	0.332482	Normal	-0.137444	0.225095
KMT2A, MLL	probable	pIossifov, pDeRubeis	ENSG00000118058	0	1	1.7181e-05	0.33267	Normal	0.516546	0.0666703
PSMD12	probable	pIossifov	ENSG00000197170	0	1	1.73211e-05	0.333271	Normal	-0.130963	0.590251
PTMS	probable	pDeRubeis	ENSG00000159335	0	1	1.73992e-05	0.333571	Normal	0.0966803	0.668018
C11orf30	probable	pDeRubeis	ENSG00000158636	0	1	1.82704e-05	0.335938	Normal	0.510714	0.0275395
UNC79	probable	pIossifov	ENSG00000133958	0	1	1.88391e-05	0.337778	Normal	NA	NA
CDC73	probable	pDeRubeis	ENSG00000134371	0	1	1.93818e-05	0.339582	Normal	0.175778	0.078507
MORC3	probable	pIossifov	ENSG00000159256	0	1	2.01819e-05	0.34176	Normal	0.929543	0.0242103
GOPC	probable	pIossifov	ENSG00000047932	0	1	2.04946e-05	0.34285	Normal	0.271255	0.0330393
CDC42BPB	probable	pIossifov, pDeRubeis, pWillsey	ENSG00000198752	0	1	2.07604e-05	0.343638	Normal	-0.0128942	0.930275
NACC1	probable	pIossifov	ENSG00000160877	0	1	2.14589e-05	0.345855	Normal	-0.0589829	0.581924
TNFRSF8	probable	pIossifov	ENSG00000120949	0	1	2.20312e-05	0.347282	Normal	-0.153962	0.218473
SMURF1	probable	pDeRubeis	ENSG00000198742	0	1	2.24006e-05	0.348559	Normal	-0.233874	0.19094
ZC3H4	probable	pIossifov	ENSG00000130749	0	1	2.4574e-05	0.353856	Normal	-0.0191532	0.83927
DIP2C	probable	pIossifov, pDeRubeis, pWillsey	ENSG00000151240	0	1	2.67513e-05	0.359566	Normal	0.289409	0.421097
GOLGA5	probable	pIossifov	ENSG00000066455	0	1	2.6834e-05	0.359904	Normal	0.132991	0.583212
NOL6	probable	pDeRubeis	ENSG00000165271	0	1	2.83189e-05	0.36366	Normal	-0.0519701	0.709923
ITGA5	probable	pDeRubeis, pWillsey	ENSG00000161638	0	1	2.95964e-05	0.367417	Normal	-0.704132	0.0764083
ASH1L	high-confidence	hcDeRubeis, pIossifov, pWillsey	ENSG00000116539	0	1	2.99447e-05	0.368168	Normal	0.930843	0.0118832
JUP	probable	pDeRubeis	ENSG00000173801	0	1	2.99914e-05	0.368243	Normal	-0.194479	0.48158
SETD2	probable	pIossifov, pDeRubeis, pWillsey	ENSG00000181555	0	1	3.00392e-05	0.368318	Normal	0.335017	0.0245546
DLL1	probable	pIossifov, pDeRubeis, pWillsey	ENSG00000198719	0	1	3.12341e-05	0.370948	Normal	-0.162867	0.328607
RPL12	probable	pDeRubeis	ENSG00000197958	0	1	3.69672e-05	0.385861	Normal	-0.219193	0.162458
CSDE1	probable	pIossifov, pDeRubeis, pWillsey	ENSG00000009307	0	1	3.7068e-05	0.386161	Normal	0.787055	0.0839345
TNRC6B	high-confidence	hcIossifov	ENSG00000100354	0	1	3.81114e-05	0.388641	Normal	0.522984	0.0671125
KLHDC10	probable	pIossifov	ENSG00000128607	0	1	3.95337e-05	0.392059	Normal	-0.321873	0.106871
MUC5B	probable	pIossifov	ENSG00000117983	0	1	4.03362e-05	0.394313	Normal	-0.016521	0.880626
UBR3	probable	pIossifov, pDeRubeis, pWillsey	ENSG00000144357	0	1	4.31511e-05	0.401375	Normal	0.313852	0.162779
KDM1B	probable	pDeRubeis	ENSG00000165097	0	1	4.31693e-05	0.401525	Normal	0.146998	0.505896
COL5A3	probable	pIossifov	ENSG00000080573	0	1	4.45673e-05	0.404605	Normal	-0.155304	0.173287
MDN1	probable	pIossifov	ENSG00000112159	0	1	4.47278e-05	0.404981	Normal	0.196671	0.164586
REXO1	probable	pIossifov	ENSG00000079313	0	1	4.65488e-05	0.408813	Normal	-0.11889	0.516987
PHF15	probable	pDeRubeis	ENSG00000043143	0	1	4.99898e-05	0.415687	Normal	-0.283379	0.0935381
UGT1A6	probable	pIossifov	ENSG00000167165	0	1	5.01179e-05	0.416025	Normal	-0.704168	0.062511
OVOL1	probable	pDeRubeis	ENSG00000172818	0	1	5.18645e-05	0.420119	Normal	-0.290516	0.0974471
FAM91A1	probable	pIossifov, pDeRubeis, pWillsey	ENSG00000176853	0	1	5.54001e-05	0.428158	Normal	0.196339	0.45811
MOV10	probable	pIossifov	ENSG00000155363	0	1	5.54672e-05	0.428384	Normal	-0.303708	0.104048
DENND5A	probable	pDeRubeis	ENSG00000184014	0	1	5.57267e-05	0.428872	Normal	0.333975	0.109777
BIRC3	probable	pDeRubeis	ENSG00000023445	0	1	5.60913e-05	0.429623	Normal	-0.150433	0.144242
CTCF	probable	pIossifov	ENSG00000102974	0	1	5.71044e-05	0.431614	Normal	0.387845	0.0820258
B4GALNT1	probable	pIossifov	ENSG00000135454	0	1	5.86209e-05	0.434882	Normal	-0.000471522	0.998936
BRWD1	probable	pIossifov, pDeRubeis, pWillsey	ENSG00000185658	0	1	5.87748e-05	0.435295	Normal	1.10693	0.0408552
UGT1A9	probable	pIossifov	ENSG00000241119	0	1	5.97254e-05	0.437399	Normal	-0.704168	0.062511
PAFAH1B2	probable	pIossifov	ENSG00000168092	0	1	6.05017e-05	0.438751	Normal	0.412642	0.165758
PHF7	probable	pIossifov, pDeRubeis, pWillsey	ENSG00000010318	0	1	6.05768e-05	0.439014	Normal	0.0682642	0.457382
ADCY9	probable	pIossifov	ENSG00000162104	0	1	6.06165e-05	0.439089	Normal	0.0674422	0.639477
SPAST	probable	pIossifov, pDeRubeis, pWillsey	ENSG00000021574	0	1	6.28317e-05	0.443372	Normal	0.927123	0.149071
DOCK5	probable	pIossifov	ENSG00000147459	0	1	6.49225e-05	0.447654	Normal	-0.158148	0.145305
MGRN1	probable	pDeRubeis	ENSG00000102858	0	1	6.57867e-05	0.449269	Normal	-0.230879	0.132111
PLXNB1	probable	pDeRubeis, pWillsey	ENSG00000164050	0	1	6.6945e-05	0.451486	Normal	-0.0283859	0.743542
FAM169A	probable	pDeRubeis	ENSG00000198780	0	1	6.79358e-05	0.453477	Normal	0.163338	0.0958718
FAM40A	probable	pDeRubeis	ENSG00000143093	0	1	7.00663e-05	0.457083	Normal	-0.0453907	0.762359
COL25A1	probable	pIossifov, pDeRubeis, pWillsey	ENSG00000188517	0	1	7.01176e-05	0.457271	Normal	-0.180315	0.14764
KDM3A	probable	pDeRubeis	ENSG00000115548	0	1	7.10154e-05	0.458698	Normal	0.701456	0.297582
SIK3	probable	pIossifov	ENSG00000160584	0	1	7.64073e-05	0.469178	Normal	-0.197356	0.128923
PLVAP	probable	pDeRubeis	ENSG00000130300	0	1	7.7439e-05	0.470831	Normal	-0.633671	0.0429139
C20orf194	probable	pDeRubeis	ENSG00000088854	0	1	7.91482e-05	0.473461	Normal	0.697343	0.0299122
SETD5	probable	pDeRubeis	ENSG00000168137	0	1	8.20379e-05	0.478344	Normal	0.37525	0.0725181
RCBTB1	probable	pIossifov	ENSG00000136144	0	1	8.52178e-05	0.482889	Normal	0.140572	0.533397
SRPK2	probable	pDeRubeis	ENSG00000135250	0	1	8.80536e-05	0.487209	Normal	0.423451	0.0510514
BIRC6	probable	pDeRubeis	ENSG00000115760	0	1	8.87524e-05	0.488449	Normal	0.248566	0.0673933
RANBP2	probable	pIossifov	ENSG00000153201	0	1	8.95966e-05	0.489839	Normal	0.185519	0.629297
PAX5	probable	pIossifov, pDeRubeis, pWillsey	ENSG00000196092	0	1	9.11378e-05	0.492468	Normal	-0.139193	0.133355
LARP4B	probable	pIossifov	ENSG00000107929	0	1	9.18101e-05	0.493558	Normal	0.807813	0.0923842
ZC3H14	probable	pDeRubeis	ENSG00000100722	0	1	9.21109e-05	0.493971	Normal	-0.295447	0.105481
PCDHA13	probable	pIossifov	ENSG00000239389	0	1	9.23906e-05	0.494422	Normal	0.599415	0.121285
UGT1A7	probable	pIossifov	ENSG00000244122	0	1	9.29549e-05	0.495473	Normal	-0.704168	0.062511
MSH4	probable	pDeRubeis	ENSG00000057468	0	1	9.39679e-05	0.496488	Normal	0.124935	0.22411
IL27	probable	pDeRubeis	ENSG00000197272	0	1	9.48558e-05	0.498028	Normal	NA	NA
PINK1	probable	pIossifov	ENSG00000158828	0	1	9.52449e-05	0.498479	Normal	-0.0734559	0.844286
TLK2	probable	pIossifov	ENSG00000146872	0	1	9.54894e-05	0.498854	Normal	0.471525	0.0353633
TSPAN4	probable	pIossifov	ENSG00000214063	0	1	9.68067e-05	0.500545	Normal	-0.67613	0.023257
SLC7A7	probable	pIossifov, pDeRubeis, pWillsey	ENSG00000155465	0	1	9.81821e-05	0.502648	Normal	-0.324796	0.0754202
GIGYF2	probable	pIossifov	ENSG00000204120	0	1	9.89536e-05	0.503663	Normal	0.306312	0.0773946
EIF2AK2	probable	pIossifov	ENSG00000055332	0	1	0.000101928	0.507832	Normal	-0.0814374	0.432115
ARVCF	probable	pIossifov	ENSG00000099889	0	1	0.000104171	0.510837	Normal	-0.177703	0.143401
PTPRR	probable	pDeRubeis	ENSG00000153233	0	1	0.000109661	0.517824	Normal	-0.0377564	0.811343
DPP3	probable	pDeRubeis	ENSG00000254986	0	1	0.000113609	0.523684	Normal	-0.184487	0.306978
ZWILCH	probable	pIossifov	ENSG00000174442	0	1	0.000117313	0.527779	Normal	0.263139	0.715424
BTN1A1	probable	pIossifov, pDeRubeis, pWillsey	ENSG00000124557	0	1	0.000117471	0.528079	Normal	0.0900743	0.30893
UGT1A10	probable	pIossifov	ENSG00000242515	0	1	0.0001201	0.530671	Normal	-0.704168	0.062511
SLC25A39	probable	pIossifov, pDeRubeis, pWillsey	ENSG00000013306	0	1	0.000120174	0.530897	Normal	-0.241406	0.25231
FRYL	probable	pDeRubeis	ENSG00000075539	0	1	0.000120244	0.531009	Normal	0.810824	0.0233651
LRRFIP1	probable	pIossifov	ENSG00000124831	0	1	0.000121073	0.532061	Normal	-0.133063	0.355459
DGKD	probable	pDeRubeis	ENSG00000077044	0	1	0.000123194	0.534766	Normal	0.18096	0.0958557
TROVE2	probable	pIossifov, pDeRubeis, pWillsey	ENSG00000116747	0	1	0.000126385	0.53886	Normal	0.730061	0.0233358
NFKBIL1	probable	pIossifov, pDeRubeis, pWillsey	ENSG00000204498	0	1	0.000127585	0.540062	Normal	-0.384122	0.191647
PCYT1A	probable	pDeRubeis, pWillsey	ENSG00000161217	0	1	0.000127599	0.5401	Normal	0.244858	0.102062
TECTA	probable	pIossifov	ENSG00000109927	0	1	0.000129105	0.541602	Normal	-0.131155	0.279741
BST2	probable	pIossifov	ENSG00000130303	0	1	0.000129655	0.542354	Normal	-0.133328	0.399422
LDB1	probable	pDeRubeis	ENSG00000198728	0	1	0.000130366	0.542955	Normal	0.00936791	0.95934
DBX2	probable	pDeRubeis	ENSG00000185610	0	1	0.000131218	0.543744	Normal	-0.0437155	0.648451
MPHOSPH8	probable	pIossifov, pDeRubeis, pWillsey	ENSG00000196199	0	1	0.000132958	0.546035	Normal	0.223709	0.26863
MYO9B	probable	pDeRubeis	ENSG00000099331	0	1	0.000135921	0.549078	Normal	0.0544747	0.586884
SIX2	probable	pDeRubeis	ENSG00000170577	0	1	0.000136718	0.550167	Normal	-1.02175	0.0231004
CDAN1	probable	pIossifov	ENSG00000140326	0	1	0.000140458	0.553773	Normal	-0.203807	0.145528
BRSK2	probable	pDeRubeis	ENSG00000174672	0	1	0.000143252	0.557267	Normal	0.215325	0.43935
SH2B1	probable	pIossifov	ENSG00000178188	0	1	0.0001448	0.55892	Normal	-0.034132	0.729789
RPAP1	probable	pIossifov	ENSG00000103932	0	1	0.000144838	0.558995	Normal	-0.253643	0.137064
FAM168B	probable	pIossifov	ENSG00000152102	0	1	0.000146217	0.560347	Normal	0.0553631	0.751707
HEATR5B	probable	pDeRubeis	ENSG00000008869	0	1	0.000146618	0.560723	Normal	-0.0951955	0.427993
FPGS	probable	pDeRubeis	ENSG00000136877	0	1	0.000147276	0.561512	Normal	-0.16369	0.35577
POLRMT	probable	pIossifov, pDeRubeis, pWillsey	ENSG00000099821	0	1	0.000147635	0.561887	Normal	0.078396	0.594529
UGT1A4	probable	pIossifov	ENSG00000244474	0	1	0.000147841	0.562	Normal	-0.704168	0.062511
MYH2	probable	pIossifov	ENSG00000125414	0	1	0.000148871	0.56324	Normal	-0.112605	0.195793
PRSS38	probable	pIossifov	ENSG00000185888	0	1	0.000153128	0.567334	Normal	NA	NA
HSPA13	probable	pDeRubeis	ENSG00000155304	0	1	0.00015351	0.567559	Normal	0.478152	0.00655647
URB1	probable	pIossifov	ENSG00000142207	0	1	0.000153562	0.56771	Normal	0.165093	0.246548
TBC1D23	probable	pIossifov, pDeRubeis, pWillsey	ENSG00000036054	0	1	0.000154144	0.568198	Normal	0.125779	0.530649
LRP2	probable	pIossifov	ENSG00000081479	0	1	0.000158998	0.573344	Normal	-0.146161	0.263662
IFT88	probable	pIossifov	ENSG00000032742	0	1	0.000159711	0.574021	Normal	0.0125964	0.935281
CUBN	probable	pIossifov, pDeRubeis, pWillsey	ENSG00000107611	0	1	0.000159981	0.574171	Normal	0.0534185	0.603031
SUFU	probable	pIossifov	ENSG00000107882	0	1	0.000160025	0.574246	Normal	-0.159791	0.184693
QRICH1	probable	pDeRubeis	ENSG00000198218	0	1	0.000163159	0.577176	Normal	0.032432	0.785951
DHX57	probable	pDeRubeis	ENSG00000163214	0	1	0.00016409	0.57804	KO	0.327729	0.2538
SKIDA1	probable	pIossifov	ENSG00000180592	0	1	0.00016456	0.578378	Normal	0.0344931	0.760421
RNF213	probable	pIossifov	ENSG00000173821	0	1	0.000164777	0.578528	KO	-0.12207	0.272921
FBXO11	probable	pIossifov	ENSG00000138081	0	1	0.000167147	0.58097	Normal	0.556712	0.20562
TRPM5	probable	pIossifov, pDeRubeis, pWillsey	ENSG00000070985	0	1	0.000169093	0.582698	Normal	-0.177916	0.0560564
NDST4	probable	pIossifov	ENSG00000138653	0	1	0.000173476	0.586229	Normal	-0.0589554	0.664544
CHD2	high-confidence	hcIossifov	ENSG00000173575	0	1	0.000176052	0.588671	Normal	0.329609	0.19711
DOT1L	probable	pIossifov	ENSG00000104885	0	1	0.000185534	0.596446	Normal	0.0794407	0.402376
NAPRT1	probable	pIossifov, pDeRubeis, pWillsey	ENSG00000147813	0	1	0.000186866	0.597423	Normal	-0.280522	0.150537
SPP2	probable	pDeRubeis, pWillsey	ENSG00000072080	0	1	0.000196615	0.60595	Normal	0.0133883	0.923484
MTHFS	probable	pDeRubeis, pWillsey	ENSG00000136371	0	1	0.000196796	0.606138	Normal	-0.30931	0.0980233
RAD21L1	probable	pIossifov, pDeRubeis, pWillsey	ENSG00000244588	0	1	0.000200483	0.608918	Normal	NA	NA
ZNF292	probable	pDeRubeis	ENSG00000188994	0	1	0.000201333	0.609519	Normal	0.919672	0.0384512
SUV420H1	high-confidence	hcDeRubeis, pIossifov, pWillsey	ENSG00000110066	0	1	0.000205337	0.612712	Normal	0.347396	0.0716436
C11orf24	probable	pIossifov	ENSG00000171067	0	1	0.000206532	0.613651	Normal	-0.117714	0.514899
ST3GAL6	probable	pDeRubeis	ENSG00000064225	0	1	0.000207958	0.614365	Normal	-0.119473	0.205988
ECE1	probable	pIossifov	ENSG00000117298	0	1	0.00020996	0.615754	Normal	-0.341575	0.071902
LIG3	probable	pIossifov	ENSG00000005156	0	1	0.00020996	0.615754	Normal	-0.31902	0.0321032
ADSS	probable	pDeRubeis	ENSG00000035687	0	1	0.000214912	0.61906	Normal	0.125367	0.783596
MAK	probable	pDeRubeis	ENSG00000111837	0	1	0.000217718	0.620863	Normal	-0.0756917	0.633066
RNF38	probable	pIossifov, pDeRubeis, pWillsey	ENSG00000137075	0	1	0.000220192	0.622291	Normal	-0.381551	0.0113475
MTMR12	probable	pDeRubeis, pWillsey	ENSG00000150712	0	1	0.000224177	0.624695	Normal	-0.133214	0.565502
UBN2	probable	pIossifov, pDeRubeis, pWillsey	ENSG00000157741	0	1	0.000227916	0.627287	Normal	0.58376	0.0733117
PLA1A	probable	pDeRubeis	ENSG00000144837	0	1	0.000231266	0.629541	Normal	-0.222245	0.154865
AKAP9	probable	pIossifov	ENSG00000127914	0	1	0.000237288	0.633259	Normal	1.20649	0.0560983
KLB	probable	pIossifov	ENSG00000134962	0	1	0.000241953	0.636039	Normal	-0.0262444	0.779328
KIAA1731	probable	pIossifov	ENSG00000166004	0	1	0.000246339	0.638819	Normal	0.566382	0.157844
ASB4	probable	pDeRubeis	ENSG00000005981	0	1	0.000248909	0.640059	KO	-0.168321	0.441509
SMAP2	probable	pIossifov	ENSG00000084070	0	1	0.000256402	0.644003	Normal	0.00598693	0.9811
RUNDC1	probable	pIossifov	ENSG00000198863	0	1	0.000257898	0.644829	Normal	-0.0870159	0.546972
NRG4	probable	pDeRubeis	ENSG00000169752	0	1	0.000261271	0.646632	Normal	-0.133679	0.342164
TUBGCP4	probable	pDeRubeis, pWillsey	ENSG00000137822	0	1	0.000266576	0.649638	Normal	0.503212	0.0244676
GIGYF1	high-confidence	hcIossifov	ENSG00000146830	0	1	0.000267705	0.650389	Normal	0.0874843	0.481156
SCUBE2	probable	pIossifov, pDeRubeis, pWillsey	ENSG00000175356	0	1	0.000269534	0.651215	Normal	-0.149686	0.245808
PFKFB2	probable	pIossifov	ENSG00000123836	0	1	0.000272379	0.652718	Normal	-0.161133	0.100753
CIC	probable	pIossifov	ENSG00000079432	0	1	0.000274916	0.65377	Normal	0.0673195	0.474761
STMN4	probable	pDeRubeis	ENSG00000015592	0	1	0.000281625	0.65685	Normal	0.0438921	0.905269
BTBD6	probable	pDeRubeis	ENSG00000184887	0	1	0.000281917	0.657	Normal	-0.259003	0.337076
PPP2R5D	probable	pIossifov	ENSG00000112640	0	1	0.000282871	0.657413	Normal	-0.158727	0.402068
KLC1	probable	pDeRubeis	ENSG00000126214	0	1	0.000283151	0.657601	Normal	-0.192981	0.192606
KAT6A	probable	pIossifov	ENSG00000083168	0	1	0.000298888	0.666016	Normal	0.620358	0.0712823
FBXW11	probable	pIossifov	ENSG00000072803	0	1	0.000304644	0.66857	Normal	-0.240855	0.270837
PRPF39	probable	pDeRubeis, pWillsey	ENSG00000185246	0	1	0.000307873	0.670411	Normal	0.173672	0.313159
CHD8	high-confidence	hcIossifov, hcDeRubeis, hcWillsey	ENSG00000100888	0	1	0.000314585	0.672777	Normal	0.519351	0.0265817
EP400	probable	pDeRubeis	ENSG00000183495	0	1	0.000315207	0.673115	Normal	0.207027	0.0469034
DSG3	probable	pIossifov	ENSG00000134757	0	1	0.000318601	0.674317	Normal	NA	NA
NUDT6	probable	pDeRubeis	ENSG00000170917	0	1	0.000333991	0.680478	Normal	0.0345937	0.735539
ZFAND5	probable	pDeRubeis	ENSG00000107372	0	1	0.000334324	0.680666	Normal	-0.105637	0.246048
ANO9	probable	pIossifov	ENSG00000185101	0	1	0.000341367	0.683671	Normal	-0.124357	0.386738
FBXO18	probable	pIossifov	ENSG00000134452	0	1	0.000392076	0.701777	Normal	-0.128719	0.177061
MFRP	probable	pIossifov, pWillsey	ENSG00000235718	0	1	0.000398171	0.70343	Normal	-0.213753	0.345761
KIAA0100	probable	pIossifov, pDeRubeis, pWillsey	ENSG00000007202	0	1	0.000414299	0.7079	Normal	-0.0829378	0.59415
CDC23	probable	pIossifov	ENSG00000094880	0	1	0.000433987	0.713685	Normal	0.197191	0.19779
TGM1	probable	pDeRubeis	ENSG00000092295	0	1	0.000442827	0.716164	KO	-0.075937	0.64935
C21orf2	probable	pIossifov	ENSG00000160226	0	1	0.000443544	0.716427	Normal	-0.295058	0.151904
UGT1A5	probable	pIossifov	ENSG00000240224	0	1	0.000445266	0.716878	Normal	-0.704168	0.062511
DDX60	probable	pIossifov	ENSG00000137628	0	1	0.000446918	0.717591	Normal	-0.122656	0.181961
MSL2	probable	pIossifov	ENSG00000174579	0	1	0.000450106	0.718268	Normal	-0.249696	0.101982
HOXD1	probable	pIossifov	ENSG00000128645	0	1	0.000453673	0.719357	Normal	-0.501854	0.0880496
SCP2	probable	pIossifov, pDeRubeis, pWillsey	ENSG00000116171	0	1	0.00047751	0.72578	Normal	-0.176576	0.250464
TERF2	probable	pIossifov	ENSG00000132604	0	1	0.000484258	0.727771	Normal	0.0794843	0.608293
MEGF6	probable	pIossifov	ENSG00000162591	0	1	0.000503101	0.732016	KO	-0.737727	0.0457426
DHX29	probable	pIossifov	ENSG00000067248	0	1	0.000513049	0.734683	Normal	0.287176	0.127996
SIRPB2	probable	pDeRubeis	ENSG00000196209	0	1	0.000514263	0.734909	Normal	NA	NA
UGT1A8	probable	pIossifov	ENSG00000241635	0	1	0.000518803	0.735848	Normal	-0.704168	0.062511
RAPGEF3	probable	pDeRubeis	ENSG00000079337	0	1	0.000540224	0.740581	Normal	-0.429801	0.00329042
KIAA0232	probable	pIossifov, pDeRubeis, pWillsey	ENSG00000170871	0	1	0.000542871	0.741032	Normal	0.775315	0.167858
ZFYVE26	probable	pIossifov, pDeRubeis, pWillsey	ENSG00000072121	0	1	0.000554241	0.743736	Normal	-0.208659	0.0523739
NAA15	probable	pDeRubeis	ENSG00000164134	0	1	0.000560497	0.745239	Normal	0.629209	0.103182
ANO5	probable	pIossifov, pDeRubeis, pWillsey	ENSG00000171714	0	1	0.000561268	0.745464	KO	NA	NA
TMEM39B	probable	pIossifov	ENSG00000121775	0	1	0.000576943	0.748432	Normal	-0.0456438	0.751316
UGT1A3	probable	pIossifov	ENSG00000243135	0	1	0.000577516	0.748657	Normal	-0.704168	0.062511
KIAA1609	probable	pDeRubeis	ENSG00000140950	0	1	0.000593719	0.751249	KO	-0.0910102	0.669612
PLCD4	probable	pIossifov	ENSG00000115556	0	1	0.000614114	0.754705	Normal	-0.159526	0.269481
CNGB3	probable	pDeRubeis	ENSG00000170289	0	1	0.000627894	0.757034	KO	-0.047364	0.576833
NUDT17	probable	pIossifov	ENSG00000186364	0	1	0.000627976	0.757071	Normal	-0.203669	0.271461
VCPIP1	probable	pDeRubeis	ENSG00000175073	0	1	0.000634102	0.758198	Normal	0.596581	0.110557
SLCO1B3	probable	pDeRubeis	ENSG00000111700	0	1	0.000645803	0.76049	Normal	-0.118796	0.323358
REPIN1	probable	pDeRubeis	ENSG00000214022	0	1	0.000684483	0.766688	Normal	-0.282967	0.130164
ADAM33	probable	pIossifov, pDeRubeis, pWillsey	ENSG00000149451	0	1	0.00068629	0.766988	Normal	-0.227992	0.150604
FREM3	probable	pIossifov, pDeRubeis, pWillsey	ENSG00000183090	0	1	0.000687366	0.767327	Normal	NA	NA
TOR1AIP2	probable	pIossifov	ENSG00000169905	0	1	0.000687972	0.767364	Normal	-0.310279	0.14986
CC2D1A	probable	pIossifov	ENSG00000132024	0	1	0.000722614	0.772398	Normal	-0.131173	0.742142
ASB17	probable	pDeRubeis	ENSG00000154007	0	1	0.000808954	0.783592	Normal	-0.122043	0.224308
IFI30	probable	pIossifov	ENSG00000216490	0	1	0.000848058	0.787799	Normal	-0.549407	0.0256892
GRAMD2	probable	pIossifov	ENSG00000175318	0	1	0.000901945	0.794035	KO	NA	NA
STARD9	probable	pIossifov	ENSG00000159433	0	1	0.000908443	0.794749	KO	0.0902168	0.501173
SCARA3	probable	pDeRubeis	ENSG00000168077	0	1	0.000954881	0.79858	Normal	-0.722111	0.075706
ACOX2	probable	pIossifov	ENSG00000168306	0	1	0.00100137	0.8032	KO	-0.0435182	0.764605
SDCCAG3	probable	pIossifov	ENSG00000165689	0	1	0.00103106	0.805529	Normal	-0.215898	0.0566055
ECM2	probable	pIossifov, pDeRubeis, pWillsey	ENSG00000106823	0	1	0.00104104	0.806243	KO	-0.0510839	0.522187
GIMAP8	probable	pIossifov, pDeRubeis, pWillsey	ENSG00000171115	0	1	0.00105787	0.807633	KO	0.0865461	0.419475
PLA2G16	probable	pDeRubeis	ENSG00000176485	0	1	0.00106634	0.808084	Normal	-0.105422	0.648281
IL3	probable	pIossifov	ENSG00000164399	0	1	0.00107277	0.808798	Normal	-0.0679136	0.49925
SPEN	probable	pIossifov	ENSG00000065526	0	1	0.00107877	0.809286	Normal	0.247997	0.0483279
VCP	probable	pIossifov, pDeRubeis, pWillsey	ENSG00000165280	0	1	0.00112392	0.812592	Normal	0.145223	0.447152
RP1L1	probable	pIossifov	ENSG00000183638	0	1	0.00113987	0.813756	KO	NA	NA
PER2	probable	pIossifov	ENSG00000132326	0	1	0.00115954	0.815672	Normal	-0.091625	0.510791
RALGAPB	probable	pDeRubeis	ENSG00000170471	0	1	0.00122604	0.820518	Normal	0.722755	0.0483853
PCOLCE	probable	pIossifov, pDeRubeis, pWillsey	ENSG00000106333	0	1	0.00122854	0.820818	Normal	-2.03102	0.0169575
COL6A6	probable	pIossifov	ENSG00000206384	0	1	0.0012928	0.825138	KO	NA	NA
FAM65C	probable	pDeRubeis	ENSG00000042062	0	1	0.00135736	0.829195	Normal	-0.248982	0.0525055
DDX3X	probable	pIossifov, pDeRubeis, pWillsey	ENSG00000215301	0	1	0.00146053	0.834492	Normal	1.20446	0.110628
WHSC1	probable	pDeRubeis	ENSG00000109685	0	1	0.00161576	0.841554	Normal	0.930866	0.097252
AFM	probable	pIossifov	ENSG00000079557	0	1	0.00164622	0.843019	KO	0.0491317	0.610323
CARKD	probable	pIossifov, pDeRubeis, pWillsey	ENSG00000213995	0	1	0.00166774	0.844108	Normal	-0.0241172	0.87154
PTK7	probable	pIossifov	ENSG00000112655	0	1	0.00168993	0.84501	Normal	-0.0474029	0.906723
VSIG4	probable	pIossifov	ENSG00000155659	0	1	0.0017044	0.845573	Normal	0.0329156	0.822897
NINL	probable	pIossifov	ENSG00000101004	0	1	0.00177038	0.84824	KO	0.0782341	0.721166
SPAG9	probable	pIossifov	ENSG00000008294	0	1	0.00185115	0.851471	Normal	0.488856	0.0661965
ZFP2	probable	pIossifov	ENSG00000198939	0	1	0.00186704	0.851997	KO	-0.102198	0.349478
SPINK5	probable	pIossifov	ENSG00000133710	0	1	0.00189667	0.853086	Normal	-0.10876	0.294769
PPM1D	probable	pIossifov, pDeRubeis, pWillsey	ENSG00000170836	0	1	0.00199133	0.856279	Normal	-0.139183	0.323481
SMARCE1	probable	pDeRubeis	ENSG00000073584	0	1	0.00205553	0.859021	Normal	-0.160894	0.433556
UGT1A1	probable	pIossifov	ENSG00000242366	0	1	0.00208074	0.85981	Normal	-0.704168	0.062511
NPBWR1	probable	pDeRubeis	ENSG00000183729	0	1	0.00218069	0.862702	Normal	NA	NA
RIPPLY1	probable	pIossifov	ENSG00000147223	0	1	0.00242106	0.869013	Normal	NA	NA
UMODL1	probable	pDeRubeis	ENSG00000177398	0	1	0.00242359	0.869201	Normal	0.0317645	0.74885
IFI44L	probable	pIossifov	ENSG00000137959	0	1	0.00249769	0.871117	KO	-0.205747	0.0622118
DVL3	probable	pIossifov	ENSG00000161202	0	1	0.00268974	0.876263	Normal	-0.0835209	0.662958
WDR33	probable	pIossifov	ENSG00000136709	0	1	0.00281896	0.878667	Normal	-0.0576653	0.582116
SHANK3	probable	pDeRubeis	ENSG00000251322	0	1	0.00349281	0.892115	Normal	-0.307504	0.214977
FLG	probable	pIossifov, pWillsey	ENSG00000143631	0	1	0.00359051	0.893468	Normal	-0.0847988	0.413881
FAM200B	probable	pIossifov	ENSG00000237765	0	1	0.00359512	0.893543	KO	-0.19182	0.236372
RUNDC3B	probable	pIossifov	ENSG00000105784	0	1	0.00359537	0.89358	Normal	0.613391	0.167461
RNF146	probable	pIossifov	ENSG00000118518	0	1	0.00375558	0.895609	Normal	0.0549047	0.65372
TCF3	probable	pDeRubeis, pWillsey	ENSG00000071564	0	1	0.00394348	0.898126	Normal	-0.21246	0.516378
USP45	probable	pIossifov	ENSG00000123552	0	1	0.00422201	0.901469	KO	0.250103	0.228989
CCDC87	probable	pIossifov	ENSG00000182791	0	1	0.00447431	0.903873	KO	-0.0508323	0.657687
SRSF11	probable	pDeRubeis	ENSG00000116754	0	1	0.00462181	0.905563	Normal	0.286573	0.140105
SCN7A	probable	pDeRubeis	ENSG00000136546	0	1	0.00482628	0.907291	KO	0.108001	0.404857
PNPLA7	probable	pIossifov	ENSG00000130653	0	1	0.00484924	0.907554	KO	-0.256338	0.0588186
USP15	probable	pIossifov, pDeRubeis, pWillsey	ENSG00000135655	0	1	0.00680113	0.921077	Normal	-0.046765	0.80132
PFKL	probable	pIossifov	ENSG00000141959	0	1	0.0093506	0.931896	Normal	-0.475692	0.178545
OR10Z1	probable	pIossifov	ENSG00000198967	0	1	0.0103539	0.935014	KO	NA	NA
BRF2	probable	pIossifov, pDeRubeis, pWillsey	ENSG00000104221	0	1	0.0114624	0.937681	KO	-0.0107577	0.959658
MLANA	probable	pIossifov	ENSG00000120215	0	1	0.012872	0.940536	Normal	-0.121357	0.45964
GLTSCR2	probable	pIossifov	ENSG00000105373	0	1	0.0130625	0.941062	Normal	-0.17503	0.51355
ASAH2	probable	pIossifov, pDeRubeis, pWillsey	ENSG00000188611	0	1	0.013687	0.942527	KO	-0.0252078	0.750115
OR52M1	probable	pIossifov	ENSG00000197790	0	1	0.0147332	0.943916	KO	NA	NA
APH1A	probable	pDeRubeis, pWillsey	ENSG00000117362	0	1	0.0201426	0.950828	Normal	-0.146693	0.556873
TRIM17	probable	pIossifov, pDeRubeis, pWillsey	ENSG00000162931	0	1	0.0240647	0.953871	Normal	-0.0475347	0.693927
LMTK3	probable	pIossifov, pDeRubeis, pWillsey	ENSG00000142235	0	1	0.0267841	0.956313	Normal	-0.0817809	0.397806
UPF3B	probable	pIossifov	ENSG00000125351	0	1	0.0331468	0.960482	Normal	0.469185	0.345919
ETFB	probable	pIossifov, pDeRubeis, pWillsey	ENSG00000105379	0	1	0.0508752	0.96777	Normal	-0.282116	0.276438
FCRL6	probable	pIossifov, pDeRubeis, pWillsey	ENSG00000181036	0	1	0.0561384	0.969085	KO	NA	NA
KIAA2018	probable	pDeRubeis	ENSG00000176542	0	1	0.0583971	0.969686	Normal	0.725327	0.0393023
CAPN8	probable	pIossifov	ENSG00000203697	0	1	0.0647868	0.971226	Normal	-0.24366	0.119789
BNIP1	probable	pIossifov	ENSG00000113734	0	1	0.0657343	0.971601	Normal	-0.189423	0.153528
KATNAL2	high-confidence	hcIossifov, hcDeRubeis, hcWillsey	ENSG00000167216	0	1	0.0662815	0.971676	Normal	-0.258096	0.119953
MFSD3	probable	pIossifov	ENSG00000167700	0	1	0.0681707	0.972278	Normal	-0.308539	0.22161
SLC6A8	probable	pIossifov	ENSG00000130821	0	1	0.0956438	0.977123	Normal	-0.181575	0.252566
CCDC66	probable	pIossifov	ENSG00000180376	0	1	0.107229	0.979114	KO	0.215412	0.273248
HAPLN3	probable	pDeRubeis	ENSG00000140511	0	1	0.119947	0.980579	Normal	-0.133492	0.290392
ZNF598	probable	pIossifov	ENSG00000167962	0	1	0.125745	0.981518	Normal	-0.196537	0.135229
AMPD1	probable	pDeRubeis	ENSG00000116748	0	1	0.135397	0.982157	Normal	0.147387	0.244296
TM4SF19	probable	pIossifov, pWillsey	ENSG00000145107	0	1	0.143518	0.983171	Normal	NA	NA
S100G	probable	pIossifov, pDeRubeis, pWillsey	ENSG00000169906	0	1	0.159855	0.984561	Normal	-0.0713141	0.523562
RAI1	probable	pIossifov	ENSG00000108557	0	1	0.162674	0.984711	Normal	0.196325	0.202151
OR4C11	probable	pIossifov	ENSG00000172188	0	1	0.218543	0.988167	Normal	NA	NA
ETV2	probable	pDeRubeis	ENSG00000105672	0	1	0.553832	0.996507	Normal	-0.108489	0.538471
P2RX5	probable	pIossifov	ENSG00000083454	0	1	0.60321	0.997183	Normal	0.190506	0.322769
MEMO1	probable	pIossifov	ENSG00000162959	0	1	0.657914	0.997746	Normal	-0.0840732	0.589299

## Sheet: Table S4
GO Cellular Component Term	pASD genes annotated w/ term w/ Tbr1 peak	pASD genes w/ Tbr1 peak	pASD genes annotated w/ term	pASD genes	Hyper p-value	Bonferroni p-value
synapse	18	189	22	477	4.45076e-05	0.0138419
cell projection	28	189	43	477	0.000361684	0.112484
cell junction	23	189	34	477	0.000580498	0.180535
GO Biological Process Term	pASD genes annotated w/ term w/ Tbr1 peak	pASD genes w/ Tbr1 peak	pASD genes annotated w/ term	pASD genes	Hyper p-value	Bonferroni p-value
muscle structure development	11	189	12	477	0.000246056	0.524346
negative regulation of cellular process	44	189	77	477	0.000533231	1.13631
nervous system development	35	189	58	477	0.000551697	1.17567
GO Cellular Component Term	pASD genes annotated w/ term w/ Tbr1 peak	pASD genes w/ Tbr1 peak	pASD genes annotated w/ term	pASD genes	Hyper p-value	Bonferroni p-value
protein binding	84	189	171	477	0.00109112	0.442993
protein binding transcription factor activity	12	189	17	477	0.00863583	3.50615
transcription factor binding transcription factor activity	12	189	17	477	0.00863583	3.50615

## Sheet: Table S5
Replicate	Treatment Total Fragments	Treatment Unique Fragments	Input Total Fragments	Input Unique Fragments	NSC	RSC	QualityTag (2 - highest)
TBR1 E15.5 Replicate 1	19361954	18157229	21899443	20790840	1.16805	1.6308	2
TBR1 E15.5 Replicate 2	17388853	16400477	21899443	20790840	1.19988	2.53517	2

## Sheet: Table S6
	Forward Primer Sequence (5’ - 3’)	Reverse Primer Sequence (5’ - 3’)
Adnp	TGTGCCCGTCATAGATTGGT	ACTATCGCAGGGTCAAGCTT
Ank2	AAGAGGCCAAATGAGGAGCT	CTGCGCAGAAATGGGAAGTT
Arid1b	CACCGGAAAGTGGTTACGTT	TTGGCTGCTAGGAGTGGATT
Chd8	TGGAATCCCTTACTCTGGCC	CACCTCCTGAAGTCTTGGGT
Cul3	AGCAACTGAAGGCTCGATTC	CTTTGCGATCCTCAGGTGTT
Dyrk1a	TCCCTGTCCAGGATCAAAAG	GCCACGTGGAATTAAGCAAT
Grin2b	CAATAACCCACCCTGTGAGG	CGGTGGTGATGGTGATAGTG
Katnal2	GCTGACGAATGACAGTTGTC	CTGTTTAAGGTGTTCCTTGA
Pogz	AGGGAGGTTAGAGGGGCTTA	GATCACTACCGGCGTTCCTA
Scn2a1	AGCCATCTTCTGCTCTTGGT	TTCGTTGGCTCAAACATGCA
Tbr1 3’ UTR	TTTGTTTTTCCCCAAAGTGC	TAAAGGTGGAGTGGGGTCTG
Tbr1 exons 2-3	CGCATGTTTCCCTTTTTGAG	CATTTGCCTCCTTGAAACCT

## Sheet: Table S7
	Forward Primer Sequence (5’ - 3’)	Reverse Primer Sequence (5’ - 3’)
Adnp	CATGGGAGGATGTAGGACTG	CAGTAAGGGCAGTTAAGGAG
Ank2	GGCCACTTGAACATTGTCCT	ATCCACAAGAGCACCATTCC
Arid1b	CAAGCAAGTCTCCCTTCCTG	CTCAGCCAACAGACCCGATT
Chd8	GAAGCCTGCAGTTACACTGAC	GGGCATTCTTGGCTTGAGTC
Cul3	GAAGGTGGTGGAGAGGGAACT	GTCTTCAAACCATTTGGCACA
Dyrk1a	TGGGGCAGAGGATATACCAG	CCACTGAACAGAGGCTCTCC
Grin2b	TGCTATCCTGCAGCTGTTTG	GCTGCCCCCAACATATAGAA
Katnal2	GTGACAACGTTGACCTGGAAA	CGTCAGCCTTTTGTTCTTCC
Pogz	GCTCTGAGAGGTCACATGTGT	AGGTGGTGAGAGAGCAGGAA
Scn2a1	GTGCCTGATTTGGGACTGTT	GTGAAGATCCCAGTGAAGAC
Tbr1	GCCCAGCTAATGGTCCTCTC	CTGCCCATTGTTGTTTGATG
Eif1a (Housekeeping gene)	AAGCTCTTCCTGGGGACAAT	ATGCTATGTGGGCTGTGTGA

## Sheet: Table S8
Gene	Vector	Insert Size (bp)	Linearizing Enzyme	RNA Pol.
Adnp	pCMV-SPORT 6	~ 1869	ScaI	T7
Ank2	pCR™II-TOPO	~ 1000	XhoI	SP6
Arid1b	pT7T3D-PacI	~ 881	SmaI	T7
Chd8	pCR™II-TOPO	~ 800	NotI	SP6
Cul3	pCR™II-TOPO	~ 950	XhoI	SP6
Dyrk1a	pCMV-SPORT 6	~ 2368	HincII	T7
Grin2b	pCR™II-TOPO	~ 750	XhoI	SP6
Katnal2	pCR™II-TOPO	~ 650	XhoI	SP6
Pogz	pCMV-SPORT 6	~ 1313	BamHI	T7
Scn2a1	pCR™II-TOPO	~ 1658	XhoI	SP6
Tbr1	pBS KDD-	~ 2400	BamHI	T7
